# Supplementary material for: Spin-state crossover in photo-catalyzed nitrile dihydroboration via Mn-thiolate cooperation
Source: Royal Society of Chemistry journal article supplement (doi:10.1039/d2sc04339d), 2022-01-01
Supplement: d2sc04339d1.pdf [file d2sc04339d1.pdf]

## Spin-state crossover in photo-catalyzed nitrile dihydroboration via Mn-thiolate cooperation

Matthew R. Elsby,<sup>#,†</sup> Changjin Oh,<sup>#,‡</sup> Mina Son,<sup>‡</sup> Scott Y. H. Kim,<sup>†</sup> Mu-Hyun Baik<sup>\*,‡</sup> and R. Tom Baker<sup>\*,†</sup>

<sup>†</sup> Department of Chemistry and Biomolecular Sciences and Centre for Catalysis Research and Innovation, University of Ottawa, Ottawa, Ontario K1N 6N5, Canada

<sup>‡</sup> Department of Chemistry, Korea Advanced Institute of Science and Technology (KAIST) and Center for Catalytic Hydrocarbon Functionalizations Institute for Basic Science (IBS), Daejeon 34141, Korea

*rbaker@uottawa.ca; mbaik2805@kaist.ac.kr*

### Electronic Supplementary Information:

#### Table of Contents:

|                                   |     |
|-----------------------------------|-----|
| I. General Considerations.....    | S2  |
| II. Synthetic Procedures .....    | S2  |
| III. Catalysis Procedures.....    | S3  |
| IV. Mechanistic Studies.....      | S6  |
| V. Spectroscopic Data.....        | S8  |
| VI. Crystallographic Details..... | S23 |
| VII. DFT Calculations.....        | S24 |
| VIII. References.....             | S81 |

## I. General Considerations.

Unless otherwise stated, all reactions were carried out under an atmosphere of dry, oxygen-free dinitrogen by means of standard Schlenk or glovebox techniques. Benzene- $d_6$  and acetonitrile- $d_3$  were degassed by three freeze-pump-thaw cycles, and subsequently dried by running through a column of activated alumina. THF- $d_8$  was run through a small plug of activated alumina before use. Toluene, hexanes, diethyl ether, acetonitrile, and THF were dried on columns of activated alumina using a J. C. Meyer (formerly Glass Contour) solvent purification system and stored over activated 4 Å molecular sieves. Photolysis was performed with a High Intensity UVA/UVB Tekizoo Sun Lamp.  $^1\text{H}$ ,  $^{13}\text{C}\{^1\text{H}\}$ , and  $^{11}\text{B}$  NMR spectra were recorded on Bruker AvanceII and AvanceIII spectrometers operating at 300 or 400, and 500 MHz respectively, with respect to proton nuclei.  $^1\text{H}$  NMR spectra were referenced to residual protons ( $\text{C}_6\text{D}_6$ ,  $\delta$  7.15), ( $\text{CD}_3\text{CN}$ ,  $\delta$  1.96), ( $\text{C}_4\text{D}_8\text{O}$ ,  $\delta$  3.58) with respect to tetramethylsilane at  $\delta$  0.00.  $^{13}\text{C}\{^1\text{H}\}$  NMR spectra were referenced to relative solvent resonances ( $\text{C}_6\text{D}_6$ ,  $\delta$  128.26,  $\text{CD}_3\text{CN}$ ,  $\delta$  118.26). EPR spectra were recorded on a Bruker Elexsys E580 X-band spectrometer and were modelled using EasySpin (v 5.25), a package developed by Stoll and Schweiger based on Matlab.<sup>1</sup> Optimized values were searched for the following parameters: isotropic  $g$  value ( $g_{iso}$ ), zero field splitting parameters ( $D$  and  $E$ ), hyperfine coupling constants ( $a_{\text{Mn}}$  and  $a_{\text{N}}$ ), and isotropic peak-to-peak line width ( $\Delta B$ ). FT-IR data were collected on a Thermo Scientific Nicolet 6700 spectrometer. All reagents were purchased from commercial suppliers. The  $[\text{S}^{Me}\text{N}^H\text{S}]$  ligand ( $\text{L}^H$ ) was synthesized according to a literature procedure.<sup>2</sup>

## II. Synthetic Protocols

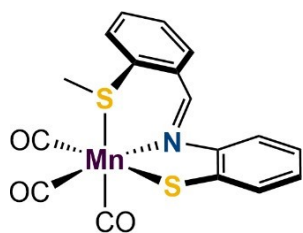

**Synthesis of  $[\text{Mn}(\kappa^3\text{-SNS}^{Me})(\text{CO})_3]$  (**1**).** A vial equipped with a magnetic stir bar was charged with  $\text{Mn}(\text{CO})_5\text{Br}$  (0.200 g, 0.730 mmol) and 5 mL of toluene. A solution of  $\text{S}^{Me}\text{N}^H\text{S}$  (0.188 g, 0.730 mmol) and lithium[bis(trimethylsilyl)amide] (0.122 g, 0.730 mmol) in 2 mL of toluene was added dropwise to the suspension, giving an immediate color change from yellow-orange to reddish-brown. The solution was stirred for 16 h, filtered through Celite, and concentrated under vacuum. The residue was washed with  $\text{Et}_2\text{O}$  (3 x 2 mL), hexane (3 x 2 mL), and dried under vacuum to yield 0.253 g of a red-brown powder (92% yield). Crystals suitable for single crystal X-ray diffraction were obtained from a concentrated acetonitrile solution at  $-30$  °C.  $^1\text{H}$  NMR ( $\text{CD}_3\text{CN}$ , 22 °C, 300 MHz):  $\delta$  2.47 (br s, 3H, S- $\text{CH}_3$ ); 6.94 (ddd, 1H, Ar- $H$ ,  $^4J_{\text{HH}} = 1.5$  Hz,  $^3J_{\text{HH}} = 7$  Hz,  $^3J_{\text{HH}} = 8.5$  Hz); 7.05 (ddd, 1H, Ar- $H$ ,  $^4J_{\text{HH}} = 1.5$  Hz,  $^3J_{\text{HH}} = 7$  Hz,  $^3J_{\text{HH}} = 8$  Hz); 7.42 (dd, 1H, Ar- $H$ ,  $^4J_{\text{HH}} = 1.5$  Hz,  $^3J_{\text{HH}} = 8$

Hz); 7.49 (dd, 1H, Ar-H,  $^4J_{HH} = 1.5$  Hz,  $^3J_{HH} = 8$  Hz); 7.64 (multiplet, 2H, Ar-H); 7.81 (multiplet, 2H, Ar-H); 8.72 (s, 1H, imine-H).  $^{13}\text{C}\{^1\text{H}\}$  NMR ( $\text{CD}_3\text{CN}$ , 22 °C, 75 MHz):  $\delta$  19.5 (s, S-CH<sub>3</sub>); 110.5 (s, Ar-C); 120.6 (s, Ar-C); 122.4 (s, Ar-C); 126.1 (s, Ar-C); 127.6 (s, Ar-C); 129.1 (s, Ar-C); 131.6 (s, Ar-C); 133.5 (s, Ar-C); 134.9 (s, Ar-C); 151.5 (s, Ar-C); 15.0 (s, Ar-C); 164.3 (s, N=CH); 216.6 (s, Mn-CO); 220.1 (s, Mn-CO); 222.7 (s, Mn-CO). IR (ATM,  $\text{cm}^{-1}$ ): 1898, 1922, 2009 (CO). HRMS (ESI-QTOF,  $\text{C}_6\text{H}_5\text{Cl}$ ): Calcd for  $\text{C}_{17}\text{H}_{12}\text{MnNO}_3\text{S}_2$   $m/z$  397.9717 ( $[\text{M}^+]$ ). Found  $m/z$  397.9736.

### III. Catalysis Protocols

#### General Procedure 'A' for Dihydroboration of Nitriles.

A catalyst stock solution was first prepared by dissolving **1** (10 mg) in  $\text{C}_6\text{D}_6$  (1 mL). A vial containing **1** (0.001 g, 100  $\mu\text{L}$ , 0.003 mmol, 1 mol%) in 0.6 g of THF was charged first with nitrile substrate (0.32 mmol), and subsequently with 2.2 equiv. pinacolborane (0.090 g, 102  $\mu\text{L}$ , 0.70 mmol) to give a dark yellow-brown solution. The solution was charged to an NMR tube, removed from the glovebox, and placed 15 cm away from a UV light sun lamp for the appropriate reaction time. Yield was determined by  $^1\text{H}$  NMR in reference to internal standard mesitylene. In the glovebox, volatile materials were removed under reduced pressure. Hexane was added to extract the product, the solution was filtered through Celite, and placed in the freezer at -35 °C overnight to afford white crystals.

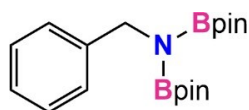

**Dihydroboration of benzonitrile.** Conducted according to *General Procedure A* using benzonitrile (0.032 g, 32  $\mu\text{L}$ , 0.32 mmol), pinacolborane (0.090 g, 102  $\mu\text{L}$ , 0.70 mmol), and catalytic **1**. The solution was placed under white light lamp with a cooling fan for 4 h (99% NMR yield).  $^1\text{H}$  NMR shifts matched with literature values.<sup>3</sup>

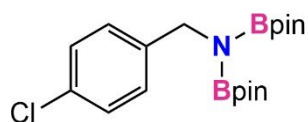

**Dihydroboration of 4-chlorobenzonitrile.** Conducted according to *General Procedure A* using 4-chlorobenzonitrile (0.044 g, 0.32 mmol), pinacolborane (0.090 g, 102  $\mu\text{L}$ , 0.70 mmol), and catalytic **1**. The solution was placed under white light lamp with a cooling fan for 4h (99% NMR yield).  $^1\text{H}$  NMR shifts matched with literature values.<sup>3</sup>

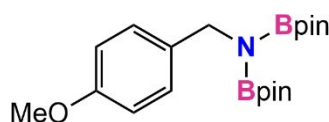**Dihydroboration of 4-methoxybenzonnitrile.**

Conducted according to *General Procedure A* using 4-methoxybenzonnitrile (0.042 g, 0.32 mmol), pinacolborane (0.090 g, 102  $\mu$ L, 0.70 mmol), and catalytic **1**. The solution was placed under white light lamp with a cooling fan for 4 h (99% NMR yield).  $^1\text{H}$  NMR shifts matched with literature values.<sup>3</sup>

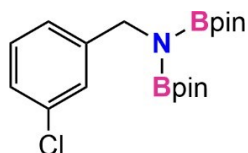**Dihydroboration of 3-chlorobenzonnitrile.**

Conducted according to *General Procedure A* using 3-chlorobenzonnitrile (0.044 g, 0.32 mmol), pinacolborane (0.090 g, 102  $\mu$ L, 0.70 mmol), and catalytic **1**. The solution was placed under white light lamp with a cooling fan for 6 h (92% NMR yield).  $^1\text{H}$  NMR shifts matched with literature values.<sup>3</sup>

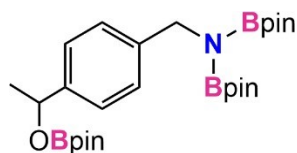**Trihydroboration of 4-acetyl-benzonnitrile.**

Conducted according to *General Procedure A* using 4-acetyl-benzonnitrile (0.022 g, 29  $\mu$ L, 0.32 mmol), pinacolborane (0.135 g, 153  $\mu$ L, 1.06 mmol, 3.3 equiv), and catalytic **1**. The solution was placed under white light lamp with a cooling fan for 5 h (95% NMR yield).  $^1\text{H}$  NMR shifts matched with literature values.<sup>3</sup>

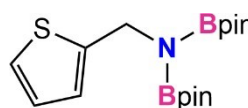**Dihydroboration of 2-cyanyl-thiophene.**

Conducted according to *General Procedure A* using 2-cyanyl-thiophene (0.035 g, 0.32 mmol), pinacolborane (0.090 g, 102  $\mu$ L, 0.70 mmol), and catalytic **1**. The solution was placed under white light lamp with a cooling fan for 5 h (96% NMR yield).  $^1\text{H}$  NMR shifts matched with literature values.<sup>3</sup>

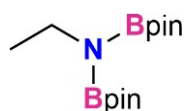**Dihydroboration of acetonitrile.**

Conducted according to *General Procedure A* using acetonitrile (0.013 g, 17  $\mu$ L, 0.32 mmol), pinacolborane (0.090 g, 102  $\mu$ L, 0.70 mmol), and catalytic **1**. The solution was placed under white light lamp with a cooling fan for 8 h (95% NMR yield).  $^1\text{H}$  NMR shifts matched with literature values.<sup>3</sup>

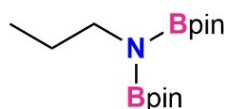**Dihydroboration of propionitrile.**

Conducted according to *General Procedure A* using propionitrile (0.017 g, 22  $\mu$ L, 0.32 mmol), pinacolborane (0.090 g, 102  $\mu$ L, 0.70 mmol), and catalytic **1**. The solution was placed under white light lamp with a cooling fan for 8 h (92% NMR yield).  $^1\text{H}$  NMR shifts matched with literature values.<sup>3</sup>

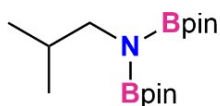

**Dihydroboration of isobutylnitrile.** Conducted according to *General Procedure A* using isobutylnitrile (0.022 g, 29  $\mu$ L, 0.32 mmol), pinacolborane (0.090 g, 102  $\mu$ L, 0.70 mmol), and catalytic **1**. The solution was placed under white light lamp with a cooling fan for 8 h (85% NMR yield).  $^1\text{H}$  NMR shifts matched with literature values.<sup>3</sup>

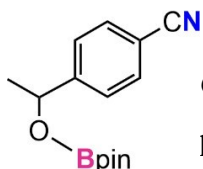

**Hydroboration of 4-acetyl-benzonitrile.** Conducted according to a modified *General Procedure A* using 4-acetyl-benzonitrile (0.022 g, 29  $\mu$ L, 0.32 mmol), pinacolborane (0.090 g, 102  $\mu$ L, 0.70 mmol), and catalytic **1**. Reactants were mixed in a vial and subsequently charged to an NMR tube. After approx. 5 minutes at room temperature the crude  $^{11}\text{B}$  NMR showed full conversion to the carbonyl-reduced products (99% NMR yield).  $^1\text{H}$  NMR shifts matched with literature values.<sup>4</sup>

**Hydroboration of 4-methoxystyrene.** Conducted according to *General Procedure A* using 4-methoxystyrene (0.042 g, 42  $\mu$ L, 0.32 mmol), pinacolborane (0.041 g, 45  $\mu$ L, 0.32 mmol), and catalytic **1**. The solution was placed under white light lamp with a cooling fan for 16 h (85% NMR yield).  $^{11}\text{B}$  NMR showed incomplete conversion to the reduced product, featuring a mixture of unreacted pinacolborane and hydroborated product (23% yield by NMR). Increasing catalyst loading to 5% gave a slight increase in product conversion (48%), but not appreciable enough to pursue further substrates. See Figure S23.

**Larger Scale Dihydroboration of benzonitrile.** Conducted according to *General Procedure A* in a 10 mL scintillation vial using: benzonitrile (0.250 g, 250  $\mu$ L, 2.42 mmol), pinacolborane (0.683 g, 775  $\mu$ L, 5.32 mmol) and catalytic **1** (0.048 g, 0.121 mmol). The solution was irradiated with a UV light sun lamp for 10 hours. Workup according to *General Procedure A* yielded 0.75 g of diborylamine product (86% yield).

#### Control Studies

**Attempted dihydroboration with HL1 and/or  $\text{MnCO}_5\text{Br}$ .** A solution of catalytic  $\text{MnCO}_5\text{Br}$  (0.01 g, 0.025 mmol) in THF was charged with benzonitrile (0.032 g, 32  $\mu$ L, 0.32 mmol) and pinacolborane (0.090 g, 102  $\mu$ L, 0.70 mmol). Another solution of catalytic  $\text{MnCO}_5\text{Br}$  (0.01 g, 0.025 mmol) and  $\text{S}^{\text{Me}}\text{N}^{\text{H}}\text{S}$  (0.009 g, 0.025 mmol) in THF was charged with benzonitrile (0.032 g, 32  $\mu$ L, 0.32 mmol) and pinacolborane (0.090 g, 102  $\mu$ L, 0.70 mmol). Both reactions were irradiated with a UV light sun lamp for 16 h. Analysis of the crude  $^{11}\text{B}$  NMR spectra showed less than 10% conversion to the reduced diborylamine product.

**Hydroboration of 4-acetyl-benzonitrile in absence of light.** Conducted according to a modified *General Procedure A* using 4-acetyl-benzonitrile (0.022 g, 29  $\mu$ L, 0.32 mmol), pinacolborane (0.135 g, 153  $\mu$ L, 1.06 mmol, 3.3 equiv), and catalytic **1**. A solution of 4-acetyl benzonitrile and **1** was added to an NMR tube wrapped in aluminum foil to protect from light. Pinacolborane was charged to the light-protected reaction mixture. The NMR tube was enclosed in a box to avoid possible light exposure and kept overnight. Analysis of the crude NMR the next day showed conversion to exclusively the carbonyl reduced product with ca. 2 equiv. of unreacted HBpin.

---

#### **IV. Mechanistic Studies**

##### *Stoichiometric Studies*

**Stoichiometric reaction of **1** and HBpin.** A dark yellow-brown solution of **1** (0.01 g, 0.025 mmol) and HBpin (0.003 g, 3.5  $\mu$ L, 0.025 mmol) in 0.5 mL of THF- $d_8$  was prepared and charged to an NMR tube. The solution was irradiated for 30 minutes which initiated a color change to a dark red-orange. Analysis of the resultant crude  $^1\text{H}$  NMR showed the disappearance of the characteristic imine C–H resonance at  $\delta$  8.81, accompanied by the growth of a new singlet at  $\delta$  4.85 indicative of a C– $H_2$  group. See **Figure S24**.

**Attempted stoichiometric dihydroboration.** A dark yellow-brown solution of **1** (0.01 g, 0.025 mmol) and HBpin (0.003 g, 3.  $\mu$ L, 0.025 mmol) in 0.5 mL of THF was prepared and charged to an NMR tube. The solution was irradiated for 30 minutes which initiated a color change to a dark red-orange and analysis of the  $^1\text{H}$  NMR confirmed borylation of the imine. Benzonitrile (0.003 g, 3  $\mu$ L, 0.025 mmol) and an additional equivalent of HBpin (0.003 g, 3.5  $\mu$ L, 0.025 mmol) were then added to the reaction mixture, which was subsequently irradiated for an additional 4 h. No color change was seen and formation of nitrile dihydroboration product was not observed.

**Analysis of crude catalysis mixture.** The dihydroboration of benzonitrile was conducted according to *General Procedure A* except with a larger catalyst loading of **1** (0.015 g). After catalysis completion, the sample was worked up according to *General Procedure A*. After hexanes product extraction, the remaining crude residue was dried under reduced pressure, redissolved in  $\text{CD}_3\text{CN}$ , and analyzed by  $^1\text{H}$  NMR. Analysis of the crude  $^1\text{H}$  NMR showed the retention of the imine C–H resonance.

**Stoichiometric reaction of 1 and benzonitrile.** A dark yellow-brown solution of **1** (0.01 g, 0.025 mmol) and benzonitrile (0.003 g, 3  $\mu$ L, 0.025 mmol) in 0.5 mL of acetonitrile- $d_3$  was prepared and charged to an NMR tube. The reaction mixture was irradiated for 2 h and no color change was observed and no change in the  $^1\text{H}$  NMR spectrum was observed.

#### $^{13}\text{C}$ -labelling Studies

**General Preparation of  $^{13}\text{C}$ -labelled  $[\text{Mn}(\kappa^3\text{-SNS}^{Me})(\text{CO})_3]$  (**1\***).** A solution of **1** (0.020 g, 0.05 mmol) in 0.6 mL THF was charged to an NMR tube equipped with a rubber septum. The NMR tube was charged with ca. 2 mL of  $^{13}\text{CO}$  and exposed to a white-light lamp for 30 minutes.  $^{13}\text{C}\{^1\text{H}\}$  NMR confirmed successful transfer of the  $^{13}\text{CO}$  to the Mn complex as indicated by observed signals at 216, 220, and 222 ppm (**Figure S2**).

**Dihydroboration of benzonitrile catalyzed by  $^{13}\text{C}$ -1.** A sample of  $^{13}\text{C}$ -**1** was prepared (0.01 g, 0.025 mmol, 10 mol%) in 0.6 mL THF. Benzonitrile (0.015 g, 12  $\mu$ L, 0.143 mmol) and HBpin (0.041 g, 46  $\mu$ L, 0.32 mmol, 2.2 equiv) were added to the solution. The NMR tube was exposed to white-light and monitored by  $^{13}\text{C}\{^1\text{H}\}$  NMR every hour until reaction completion. The resulting  $^{13}\text{C}\{^1\text{H}\}$  NMR spectra are shown in **Figure S24**.

#### EPR Studies

**Observation of paramagnetic intermediate.** A catalytic reaction mixture of benzonitrile, HBpin, and 10% **1** was prepared according to *General Procedure A*. An initial EPR spectrum of the mixture afforded no signal. The reaction mixture in the EPR tube was irradiated for 45 min and an EPR spectrum was recorded with continuous irradiation in the cavity. The resulting EPR spectrum is shown in **Figure S25**. The spectrum was modelled with the Easyspintool in MATLAB as a fit for hyperfine coupling to  $^{55}\text{Mn}$  and  $^{14}\text{N}$  with the following parameters:

```
%%
clc
Sys.g = 1.995;
Sys.Nucs = '55Mn,14N'; %nuclei
Sys.A = [42.5 41.2]; %MHz
Sys.lwpp = 0.5; %mT for random distribution
Exp.mwFreq = 9.8; %GHz
Exp.Range = [280 420]; %sweepwidth
[C,spp] = garlic(Sys,Exp);
%%
plot(B,spc,'black',C,spp,'r');
xlabel 'Magnetic Field (mT)';
```

## V. NMR Spectra

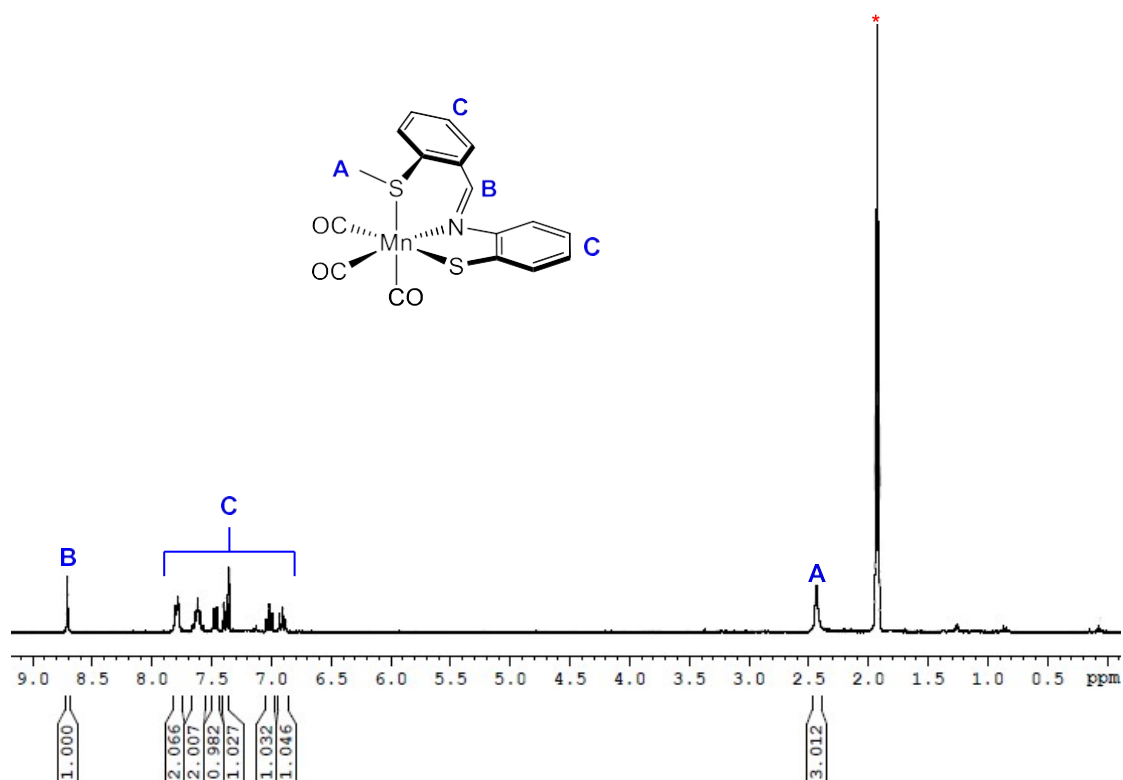

Figure S1.  $^1\text{H}$  spectrum of  $[\text{Mn}(\kappa^3\text{-SNS}^{\text{Me}})(\text{CO})_3]$  (1). \* is protic impurity in acetonitrile- $d_3$ .

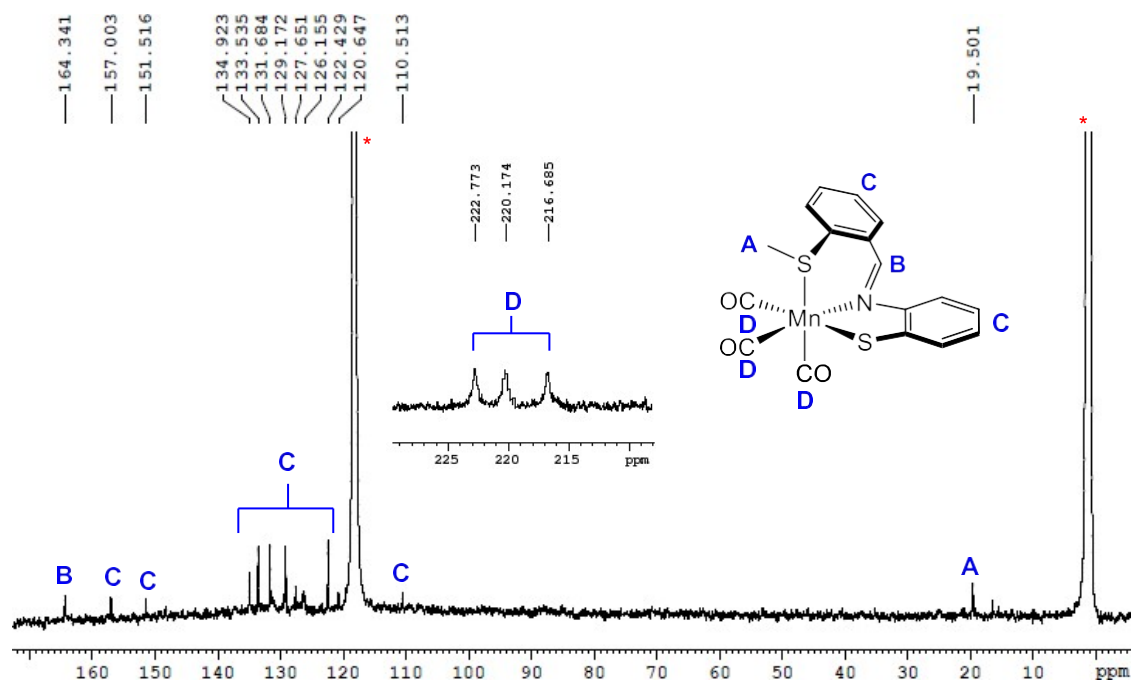

Figure S2.  $^{13}\text{C}\{^1\text{H}\}$  spectrum of  $[\text{Mn}(\kappa^3\text{-SNS}^{\text{Me}})(\text{CO})_3]$  (1). \* is acetonitrile- $d_3$ .



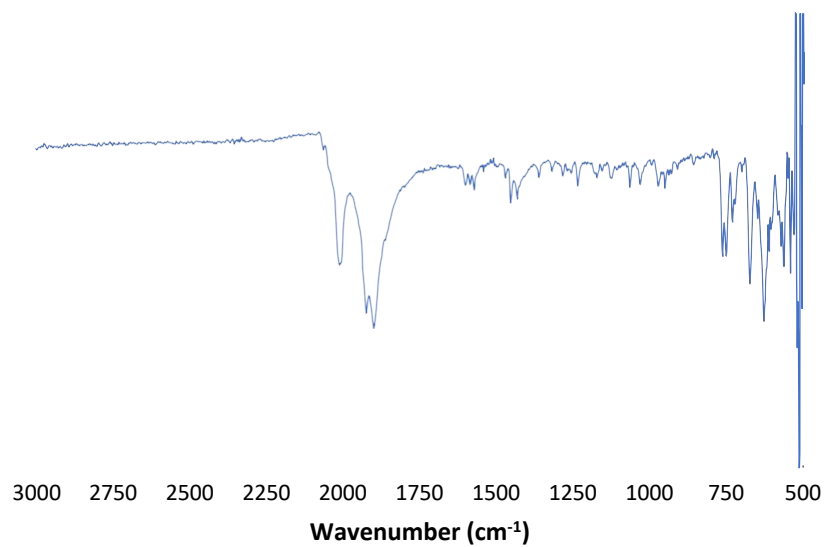

**Figure S3.** FT-IR (solid) spectrum of **1**.

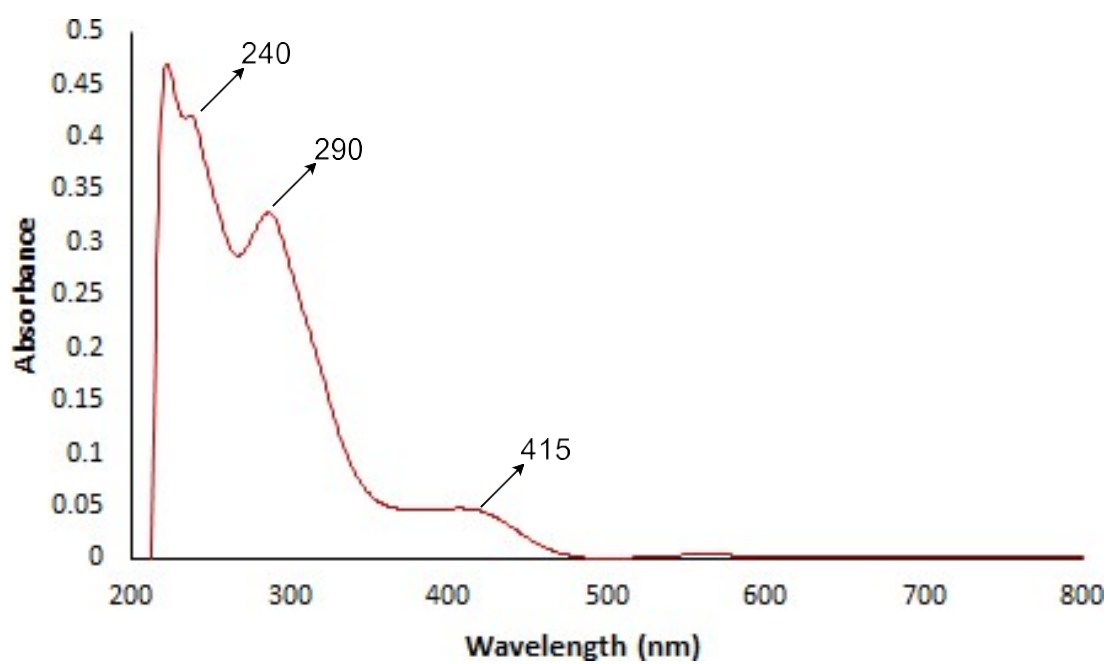

**Figure S4.** UV-vis spectrum of **1**.

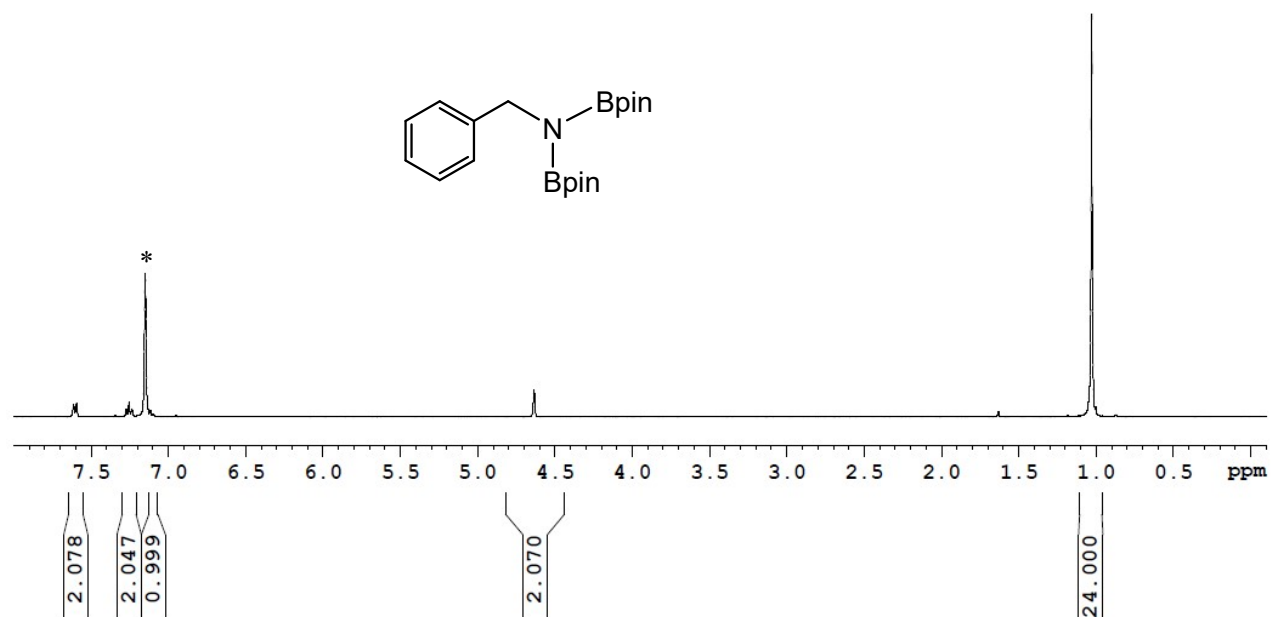

**Figure S5.**  $^1\text{H}$  spectrum of benzonitrile dihydroboration product. \* is protic impurity in benzene- $d_6$ .

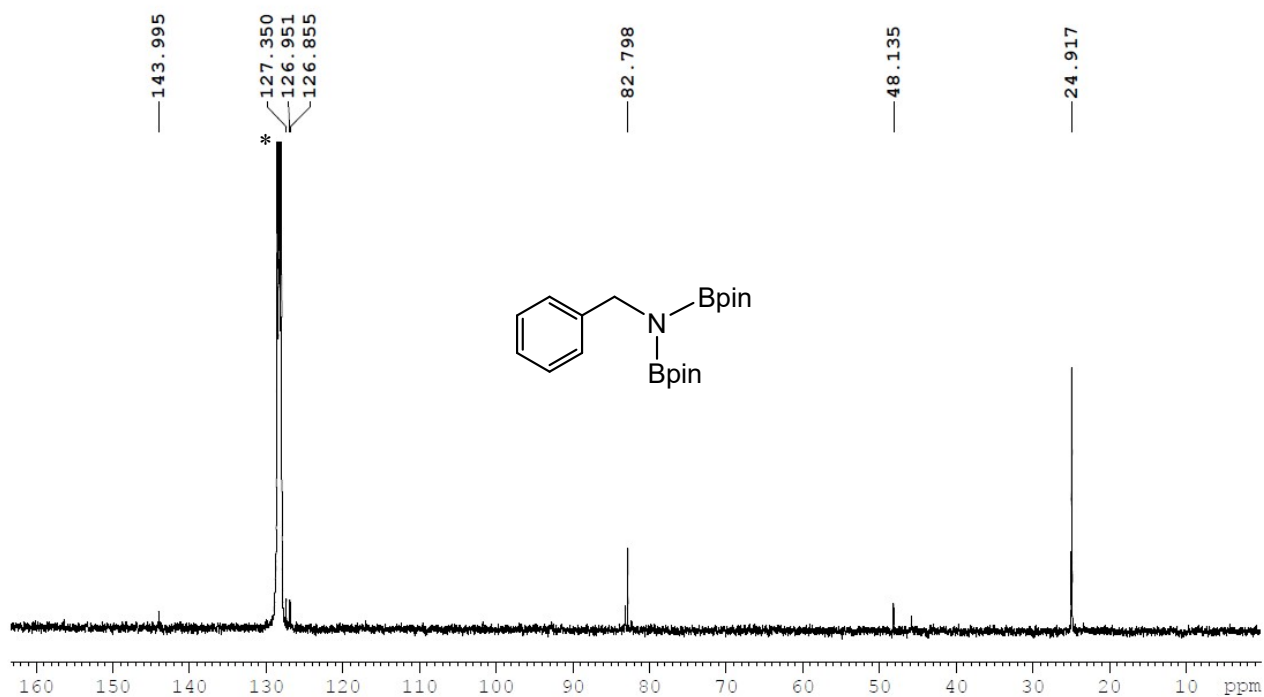

**Figure S6.**  $^{13}\text{C}\{^1\text{H}\}$  spectrum of benzonitrile dihydroboration product. \* is benzene- $d_6$ .

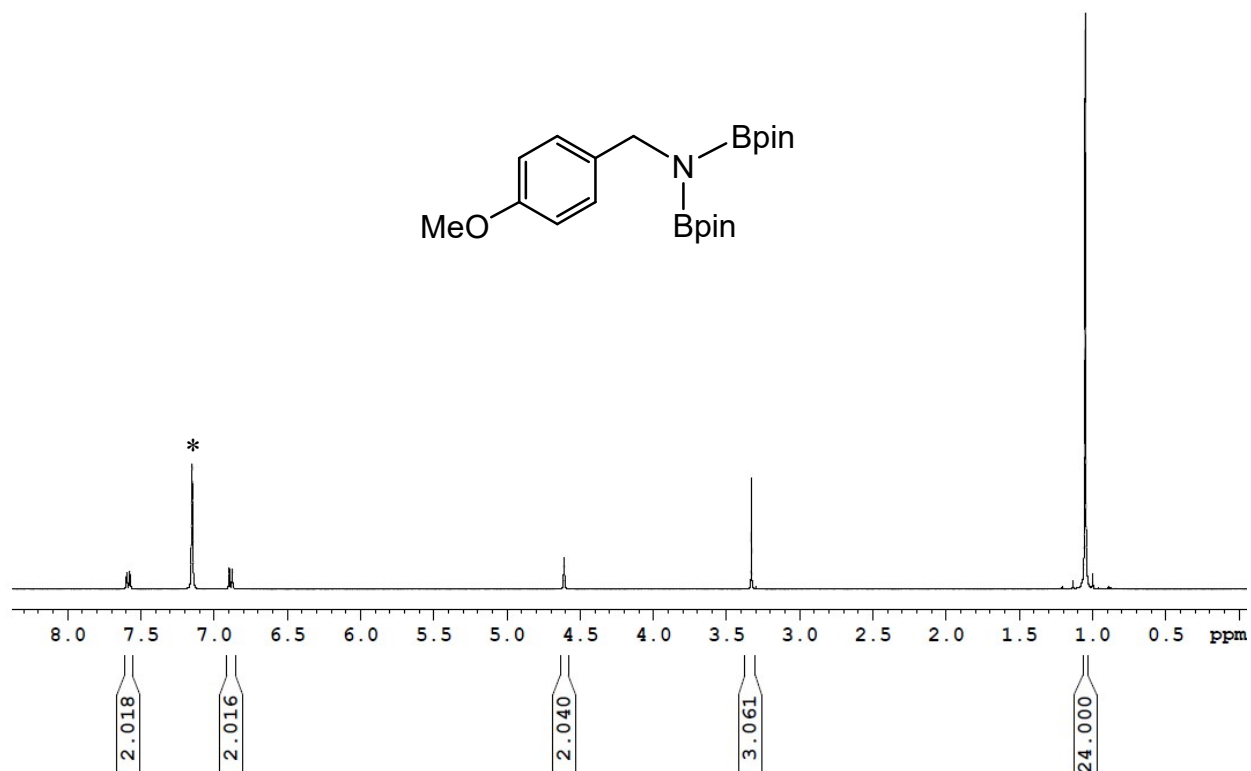

**Figure S7.**  $^1\text{H}$  spectrum of 4-methoxy benzonitrile dihydroboration product. \* is protic impurity in benzene- $d_6$ .

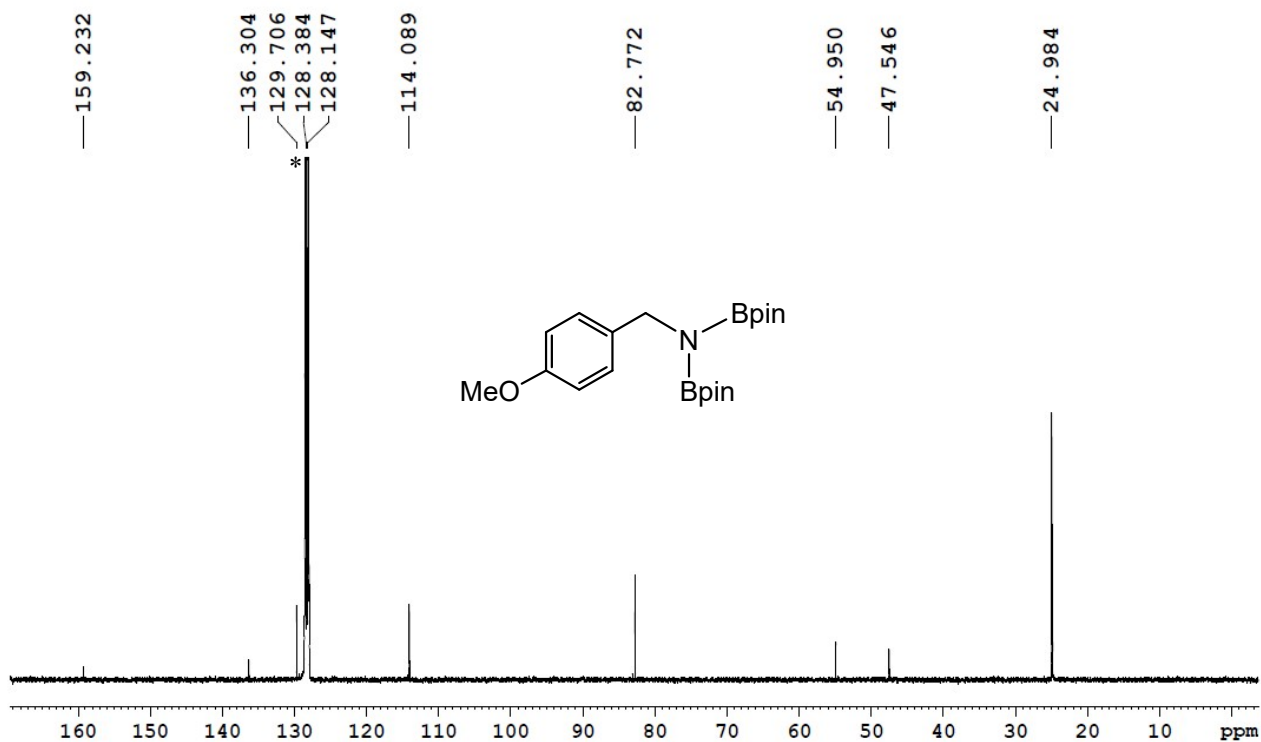

**Figure S8.**  $^{13}\text{C}\{^1\text{H}\}$  spectrum of 4-methoxy benzonitrile dihydroboration product. \* is benzene- $d_6$ .

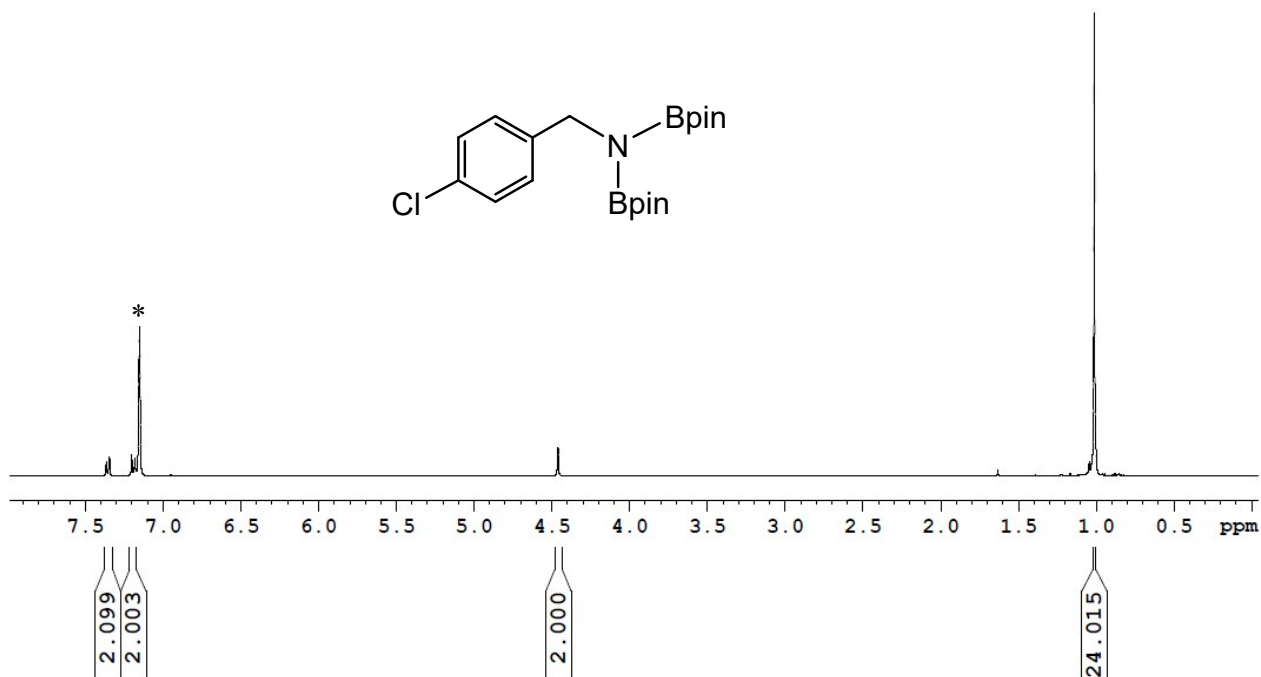

**Figure S9.** <sup>1</sup>H spectrum of 4-chloro benzonitrile dihydroboration product. \* is protic impurity in benzene-*d*<sub>6</sub>.

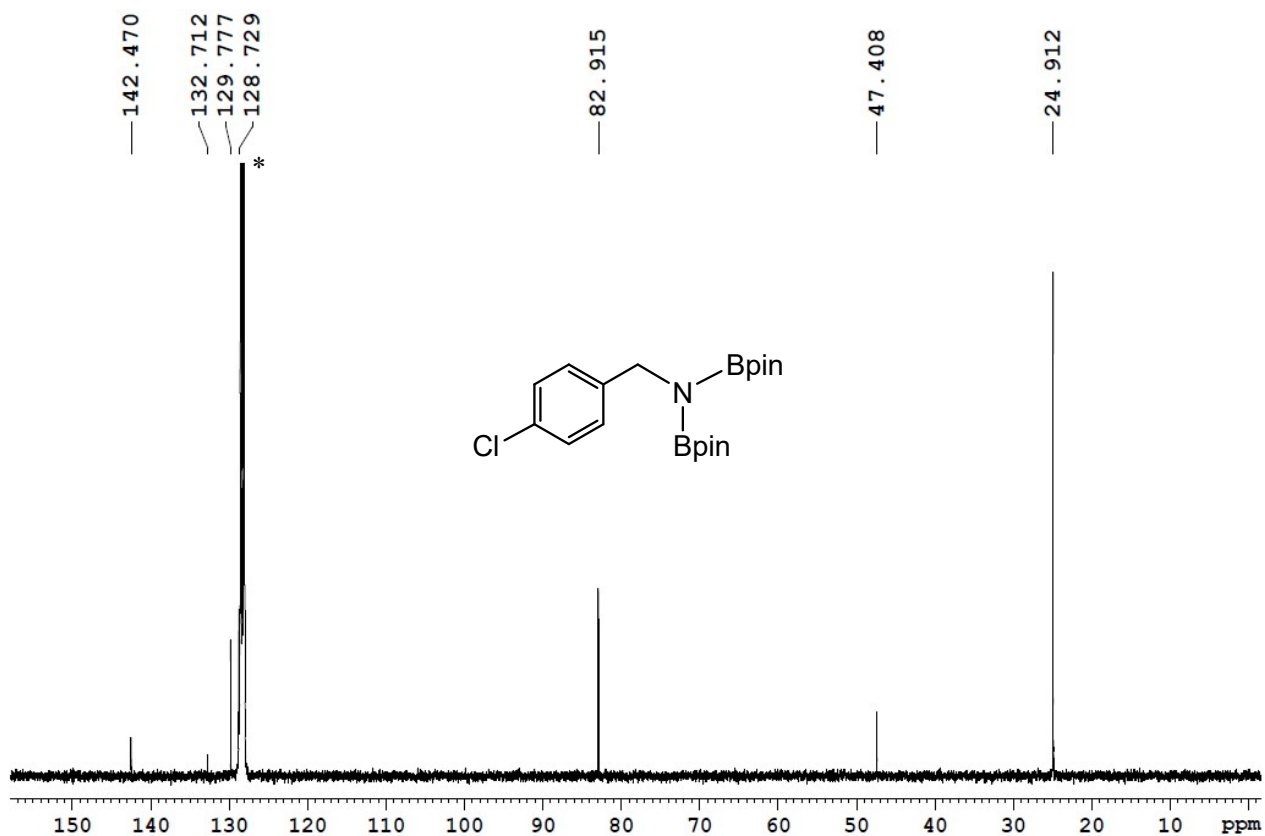

**Figure S10.** <sup>13</sup>C{<sup>1</sup>H} spectrum of 4-chloro benzonitrile dihydroboration product. \* is benzene-*d*<sub>6</sub>.

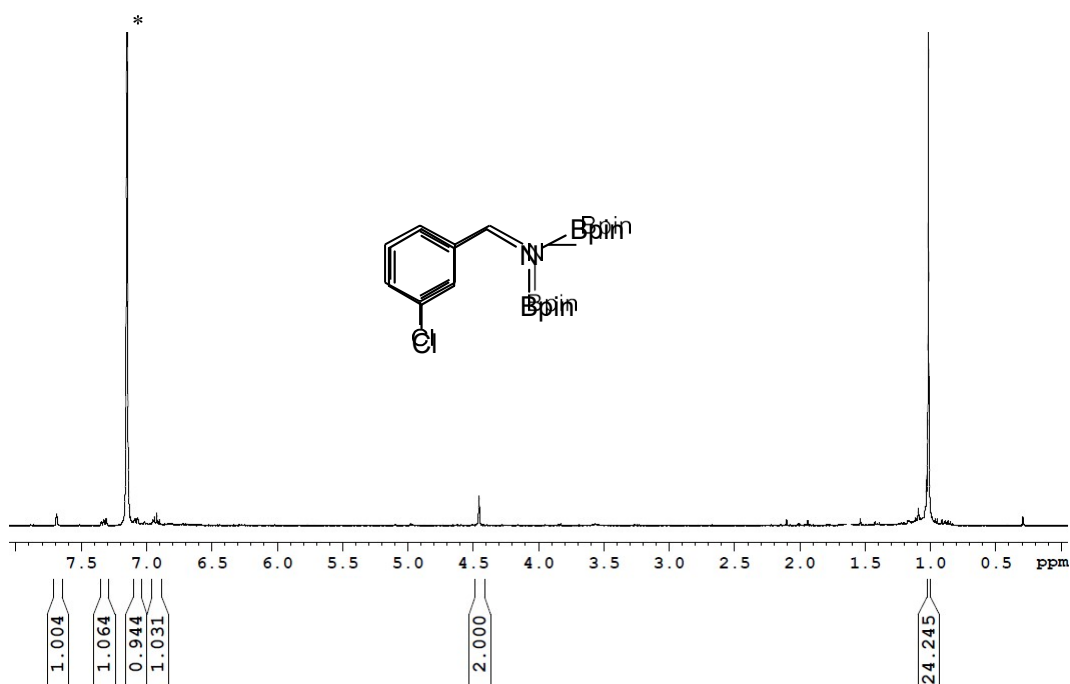

**Figure S11.**  $^1\text{H}$  spectrum of 3-chloro benzonitrile dihydroboration product. \* is protic impurity in benzene- $d_6$ .

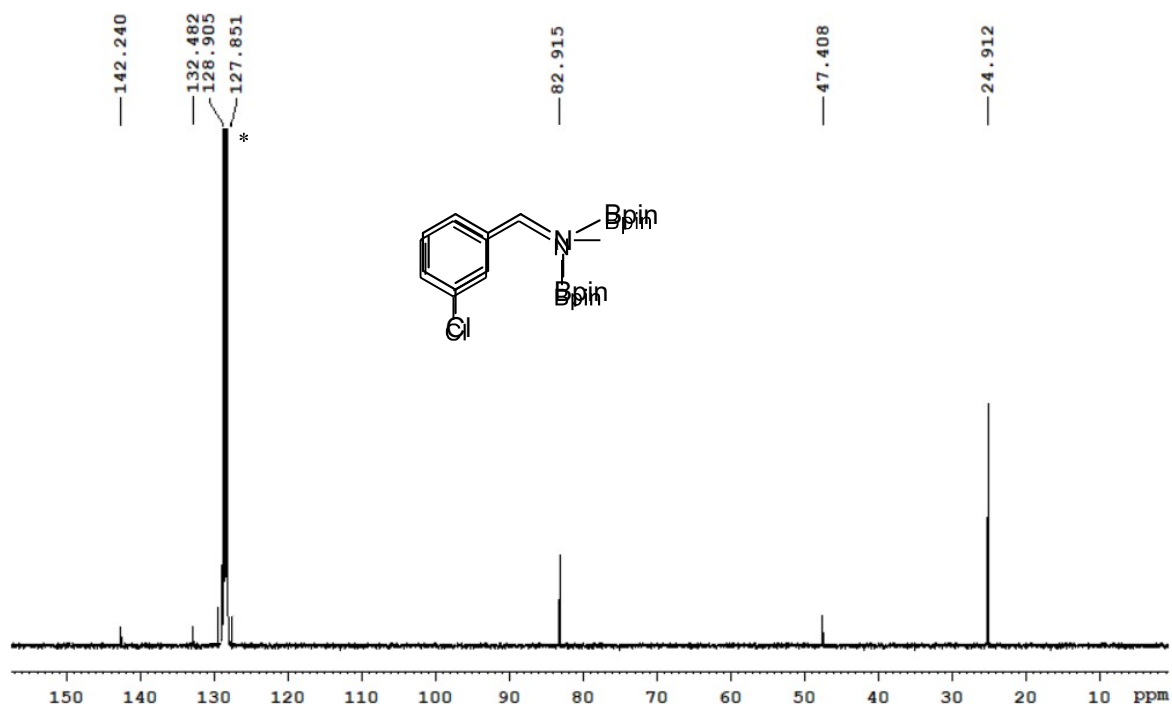

**Figure S12.**  $^{13}\text{C}\{^1\text{H}\}$  spectrum of 3-chloro benzonitrile dihydroboration product. \* is benzene- $d_6$ .

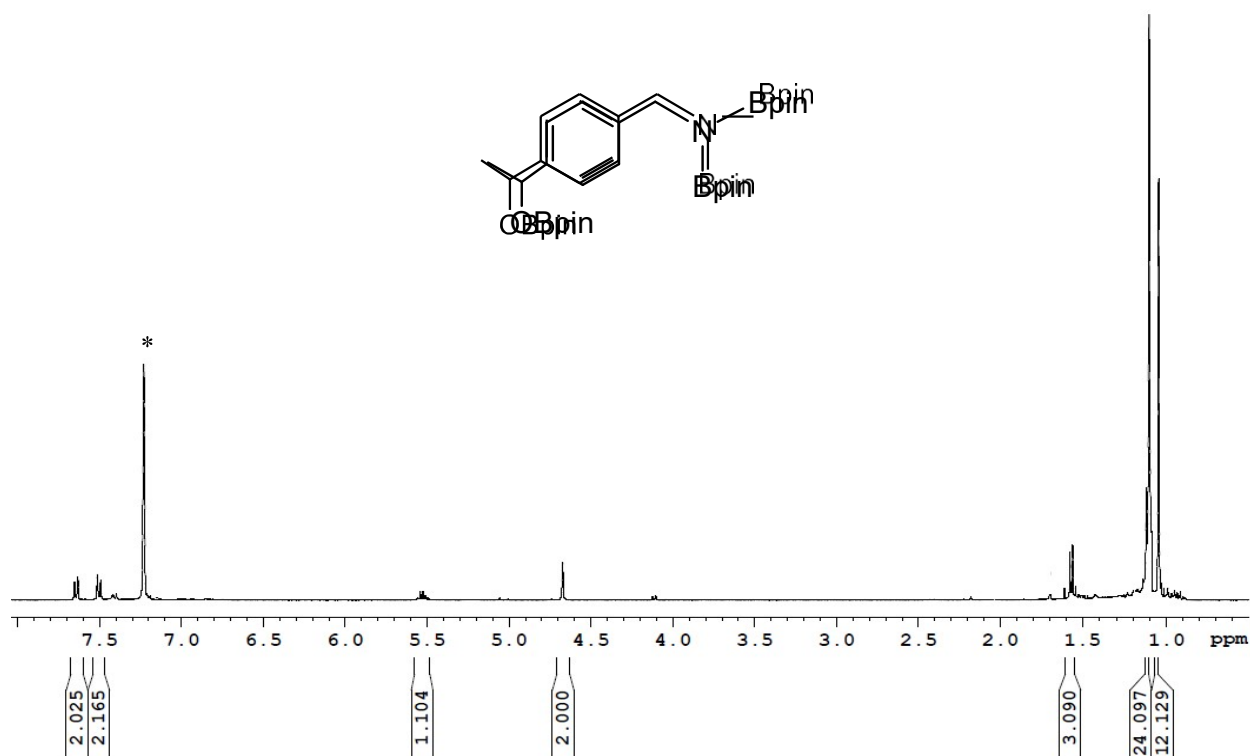

**Figure S13.**  $^1\text{H}$  spectrum of 4-acetyl benzonitrile trihydroboration product. \* is protic impurity in benzene- $d_6$ .

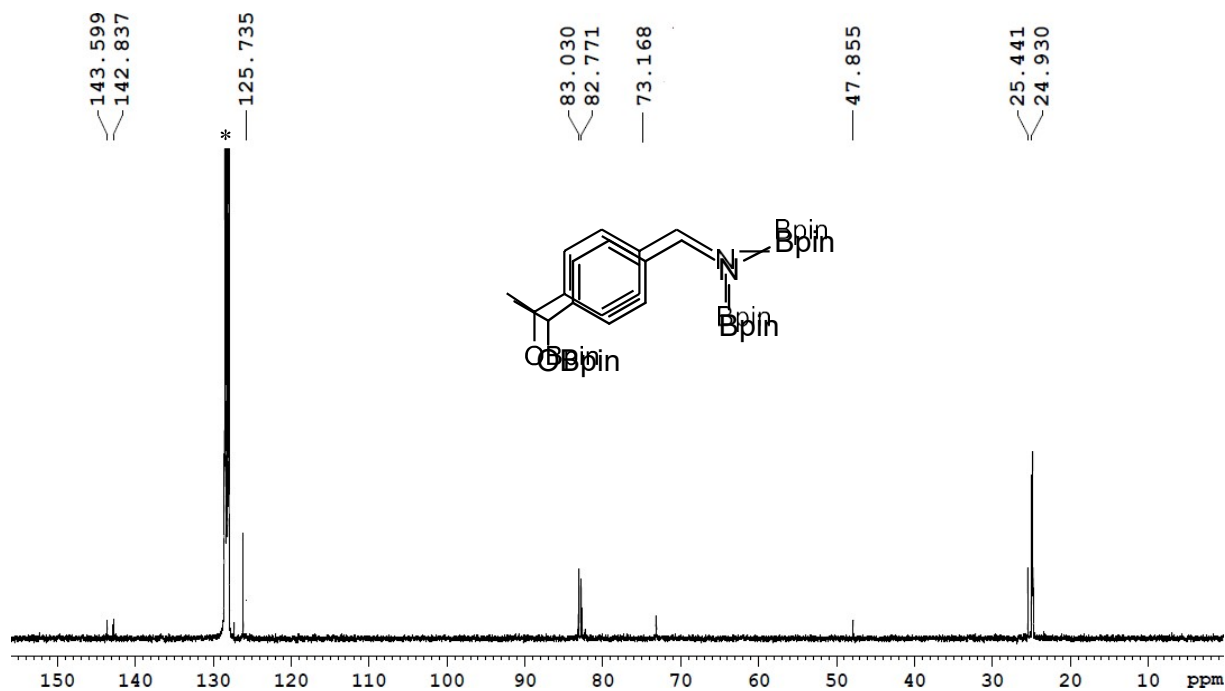

**Figure S14.**  $^{13}\text{C}\{^1\text{H}\}$  spectrum of 4-acetyl benzonitrile trihydroboration product. \* is benzene- $d_6$ .

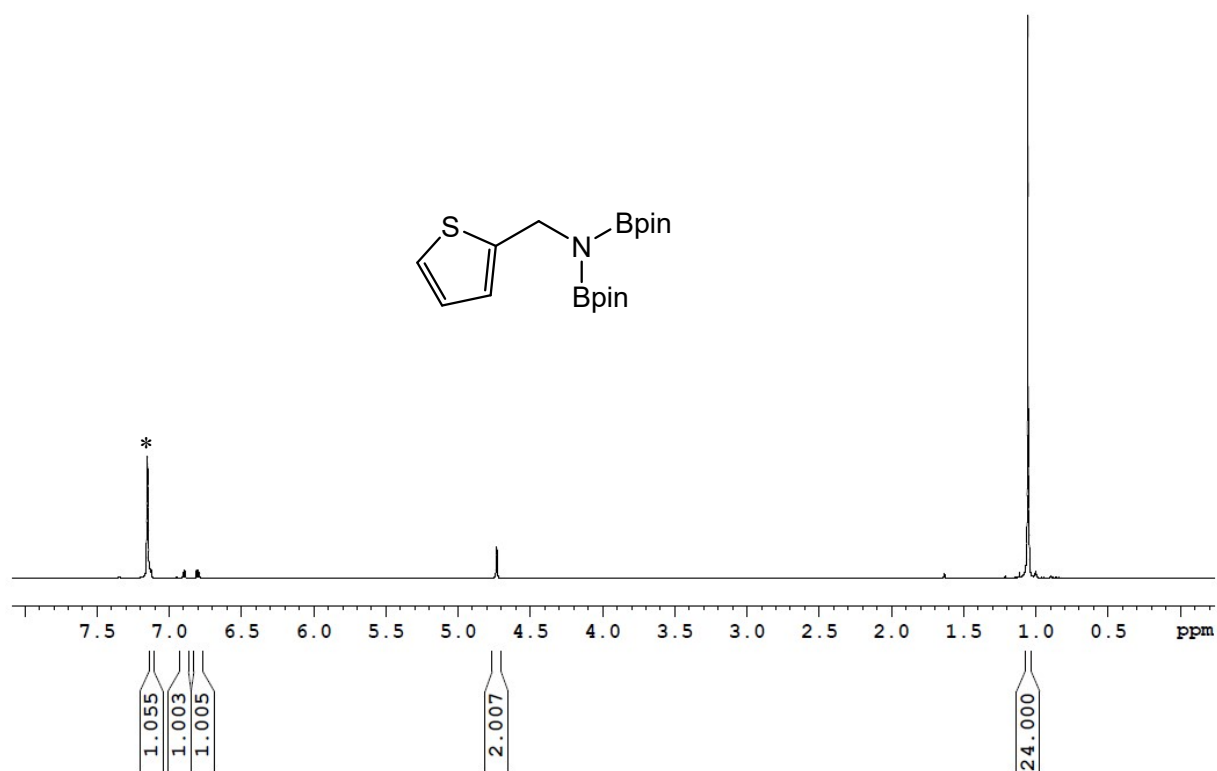

**Figure S15.** <sup>1</sup>H spectrum of 2-cyanyl-thiophene dihydroboration product. \* is protic impurity in benzene-*d*<sub>6</sub>.

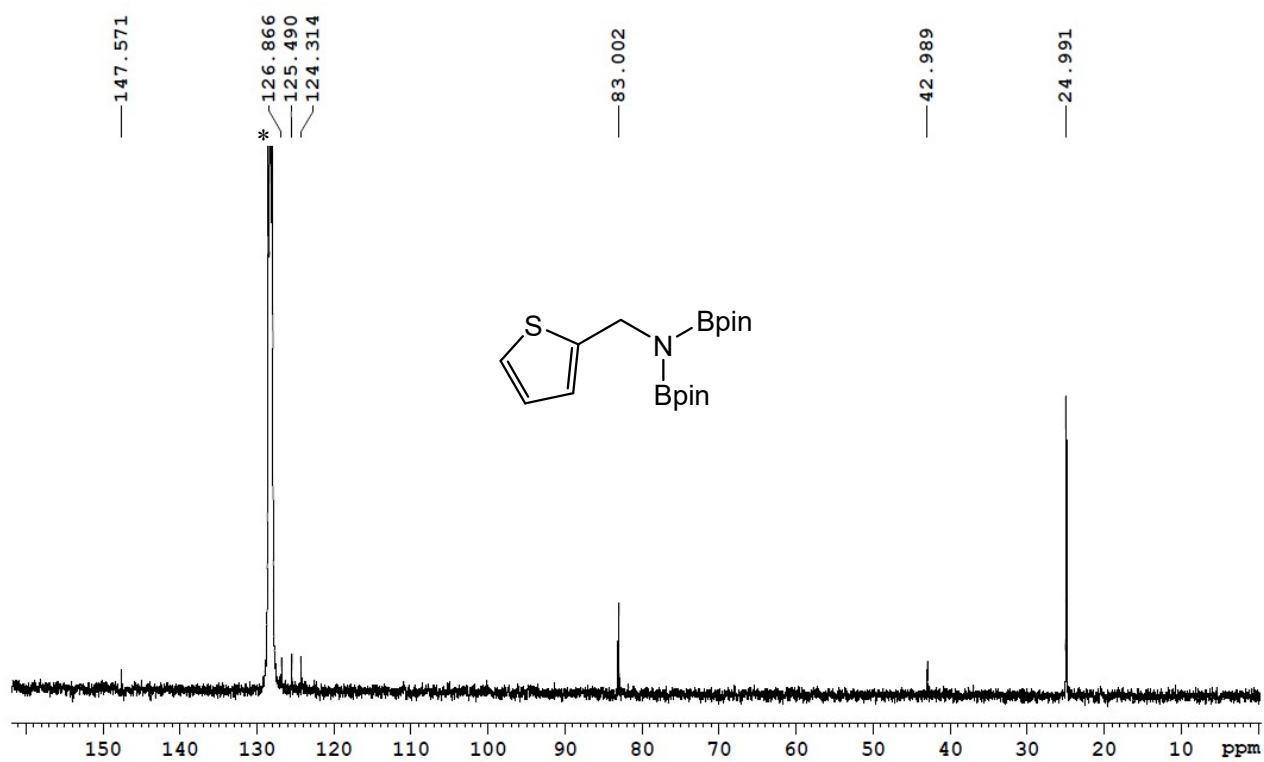

**Figure S16.** <sup>13</sup>C{<sup>1</sup>H} spectrum of 2-cyanyl-thiophene benzonitrile dihydroboration product. \* is benzene-*d*<sub>6</sub>.

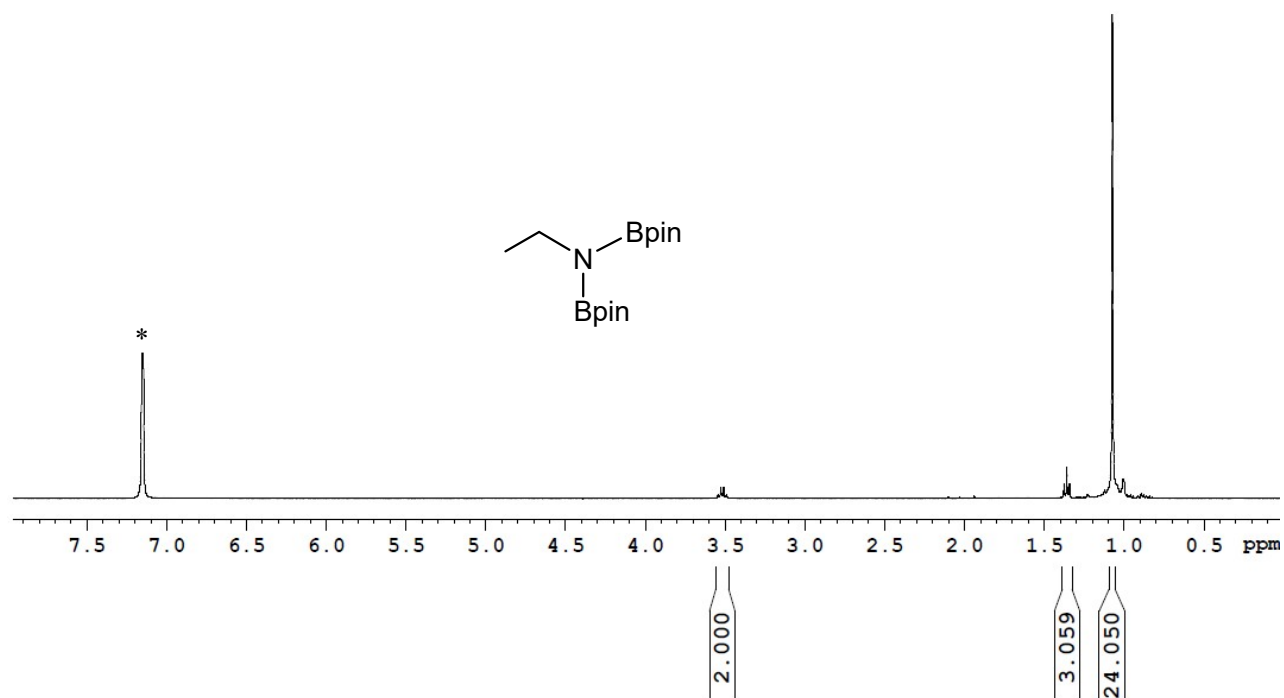

**Figure S17.**  $^1\text{H}$  spectrum of acetonitrile dihydroboration product. \* is protic impurity in benzene- $d_6$ .

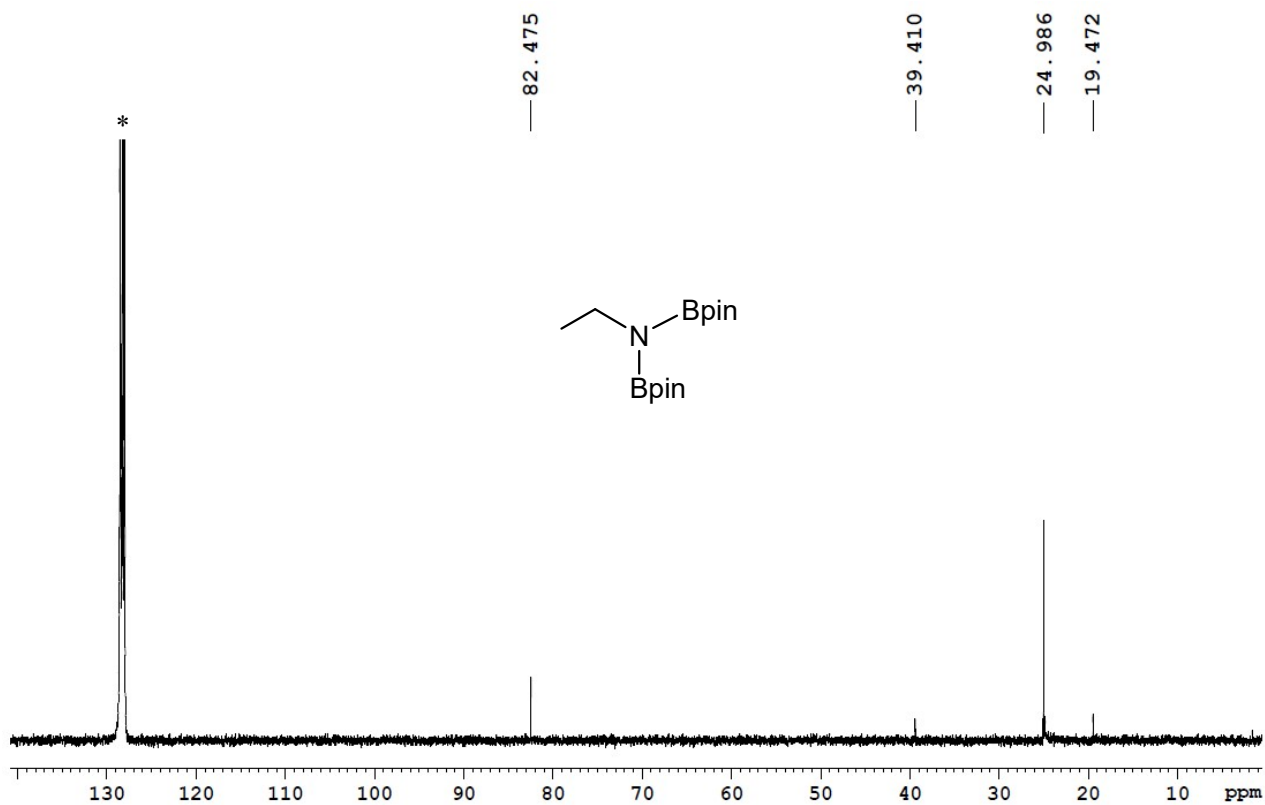

**Figure S18.**  $^{13}\text{C}\{^1\text{H}\}$  spectrum of acetonitrile dihydroboration product. \* is benzene- $d_6$ .



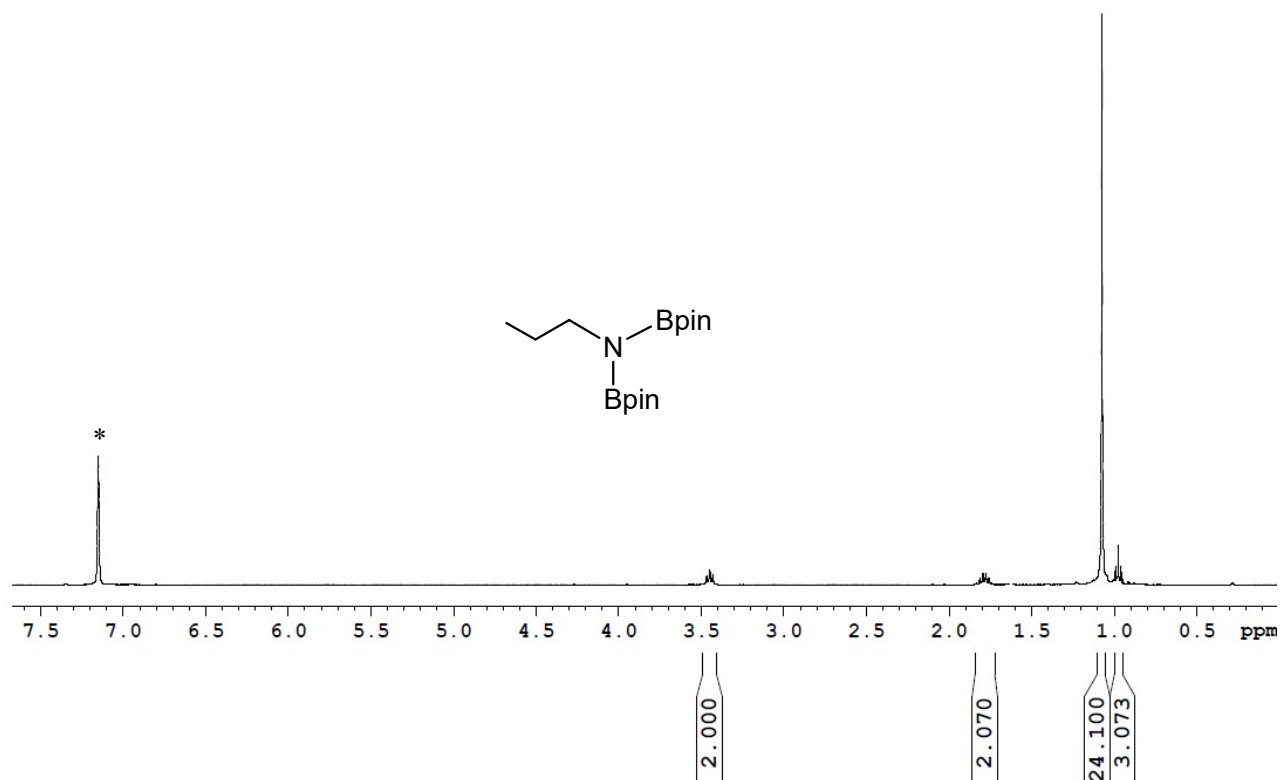

**Figure S19.**  $^1\text{H}$  spectrum of propionitrile dihydroboration product. \* is protic impurity in benzene- $d_6$ .

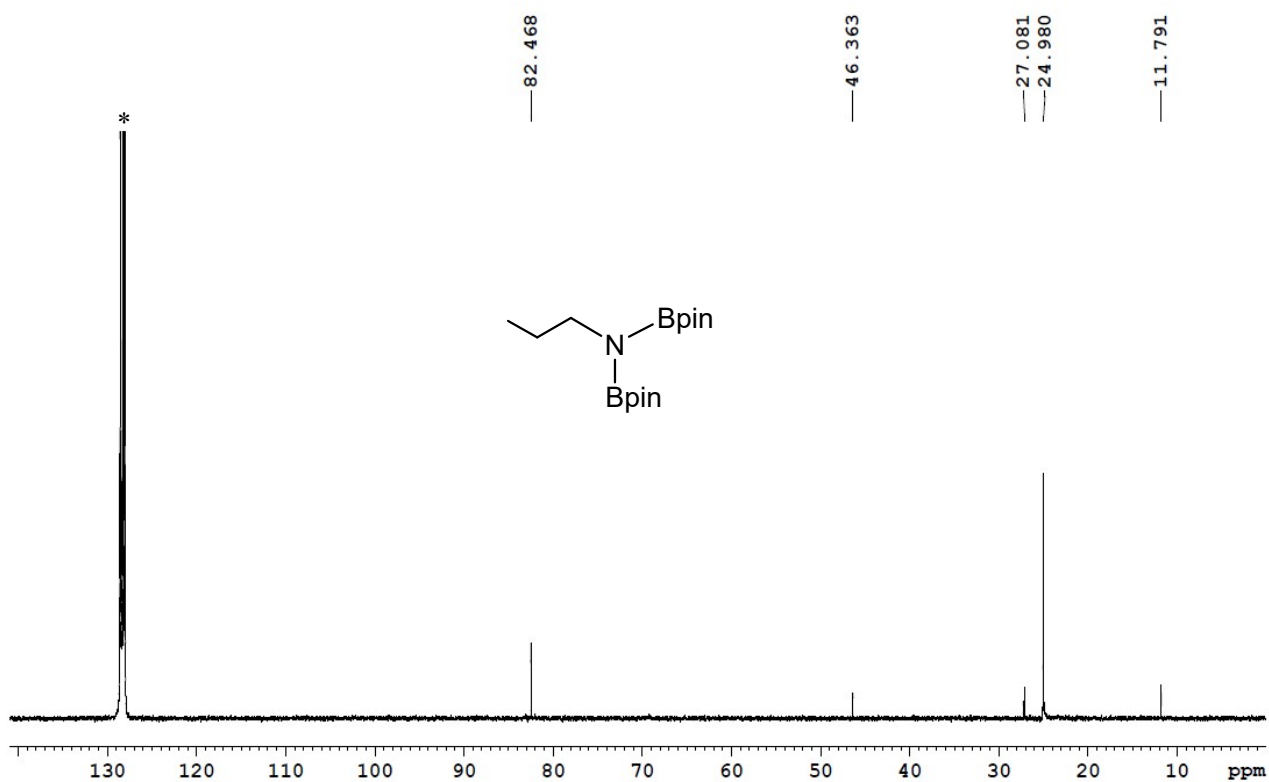

**Figure S20.**  $^{13}\text{C}\{^1\text{H}\}$  spectrum of propionitrile dihydroboration product. \* is benzene- $d_6$ .

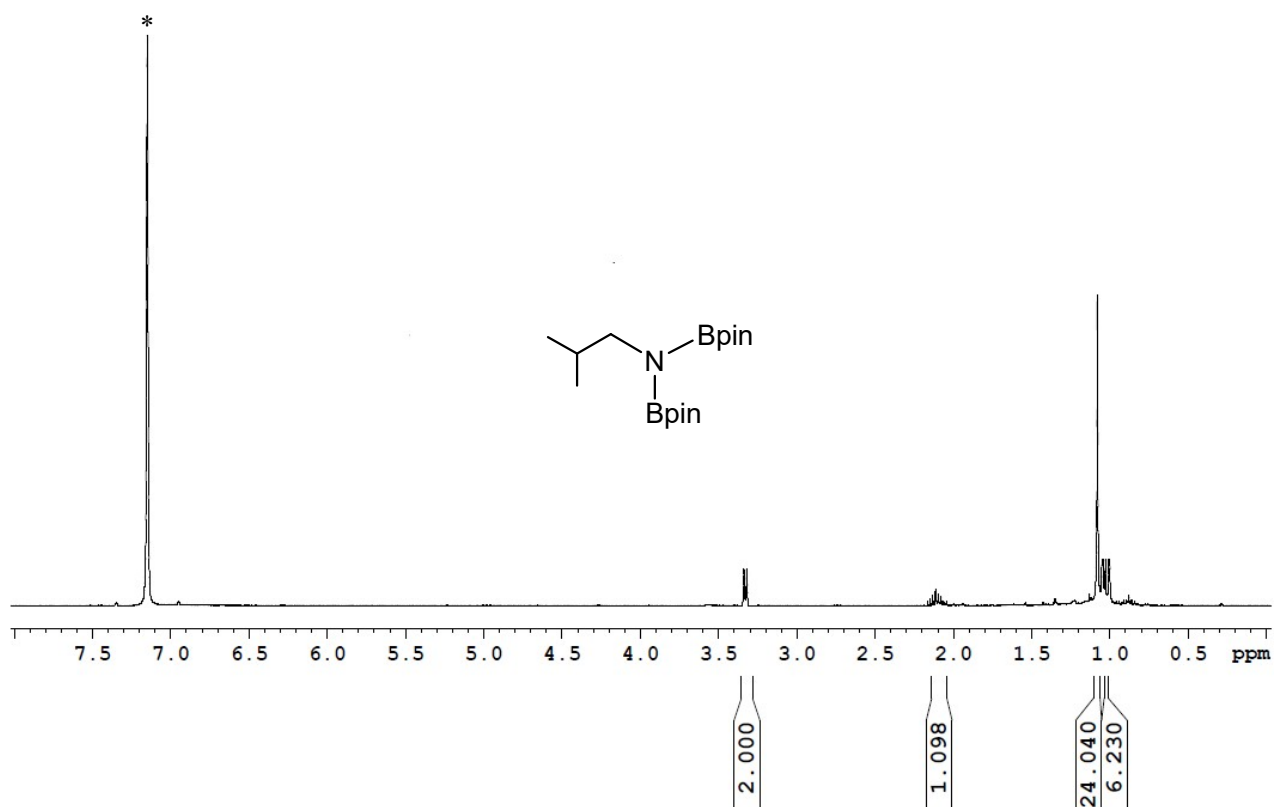

**Figure S21.**  $^1\text{H}$  spectrum of isobutylnitrile dihydroboration product. \* is protic impurity in benzene- $d_6$ .

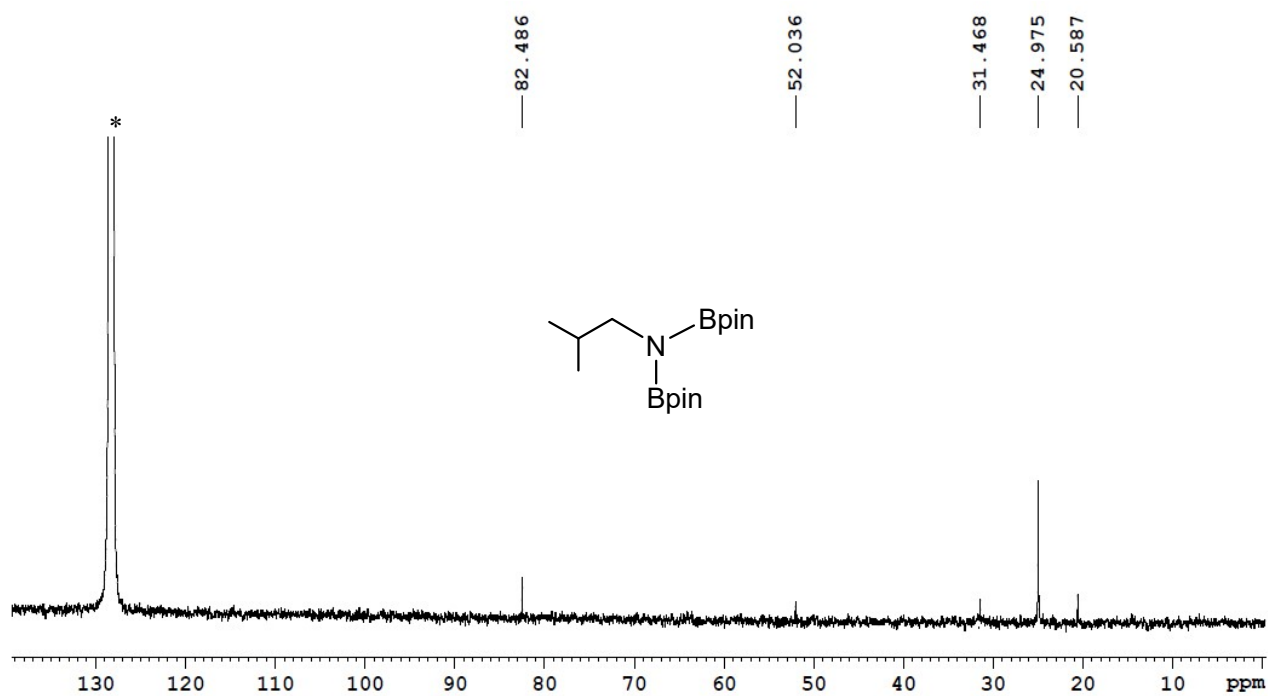

**Figure S22.**  $^{13}\text{C}\{^1\text{H}\}$  spectrum of isobutylnitrile dihydroboration product. \* is benzene- $d_6$ .

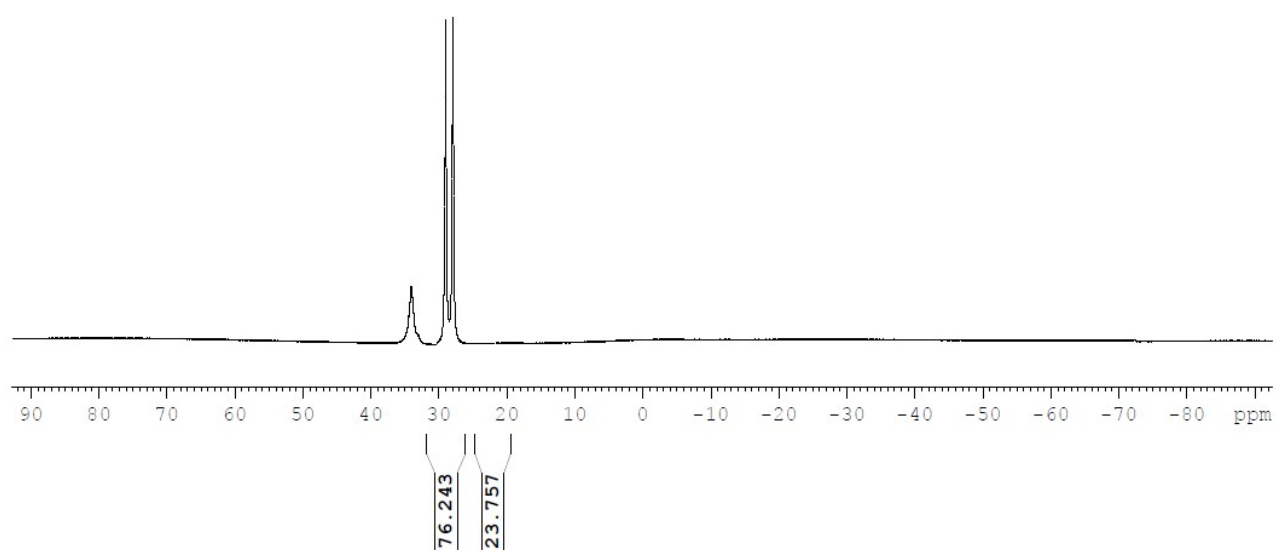

**Figure S23.** Crude  $^{11}\text{B}$  NMR spectrum (96 MHz, THF) of 4-methoxystyrene hydroboration product.

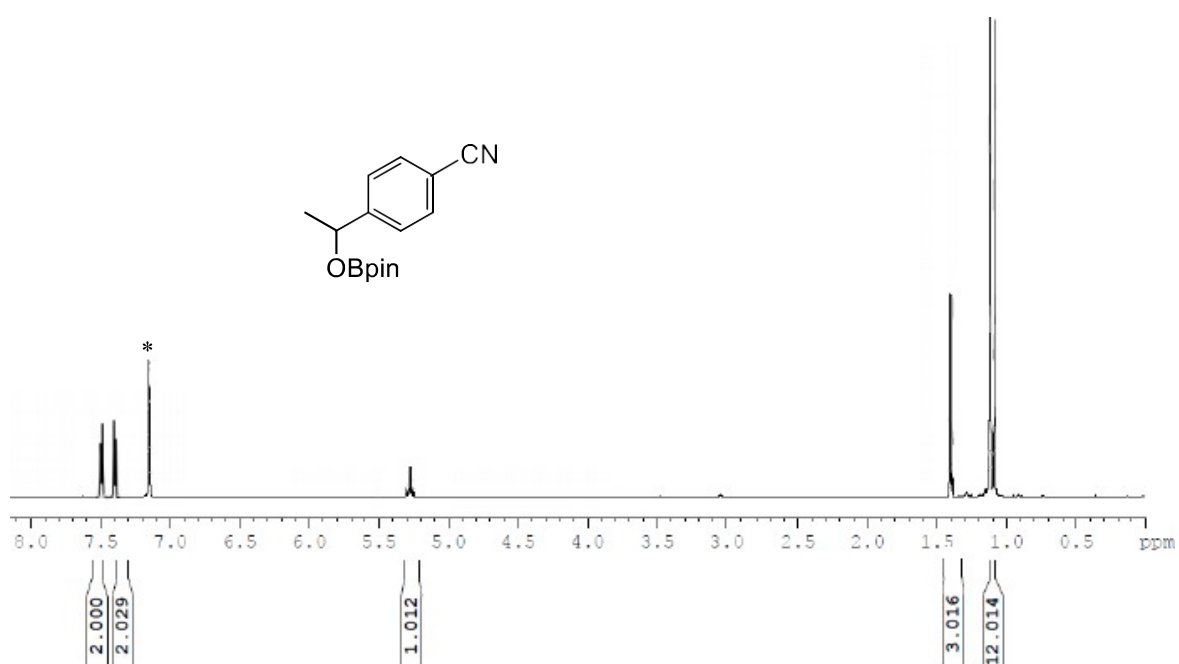

**Figure S24.**  $^1\text{H}$  spectrum of 4-acetyl benzonitrile hydroboration product. \* is protic impurity in benzene- $d_6$ .

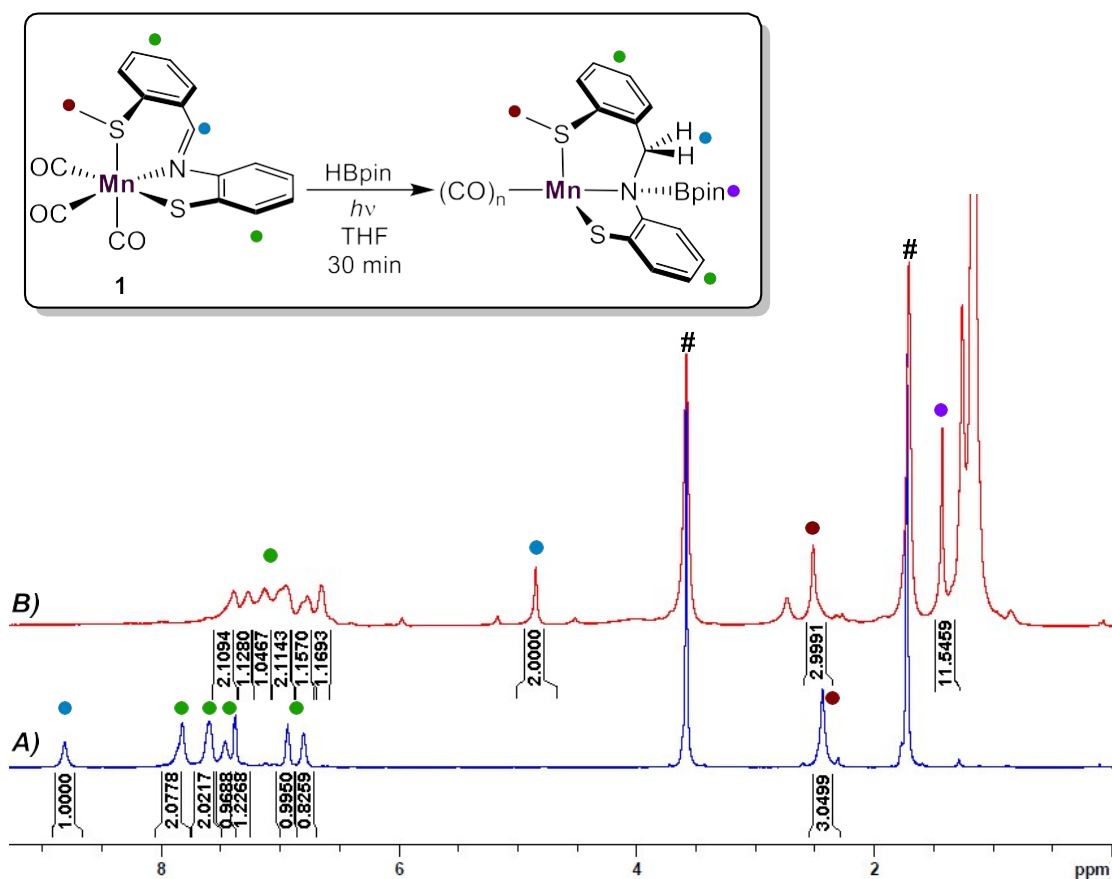

**Figure S25.** Stacked plot of  $^1\text{H}$  NMR spectra showing A) complex **1** in THF- $d_8$ , and B) reaction of **1** and 1.2 equiv. of HBpin – irradiated for 30 min. # is THF.

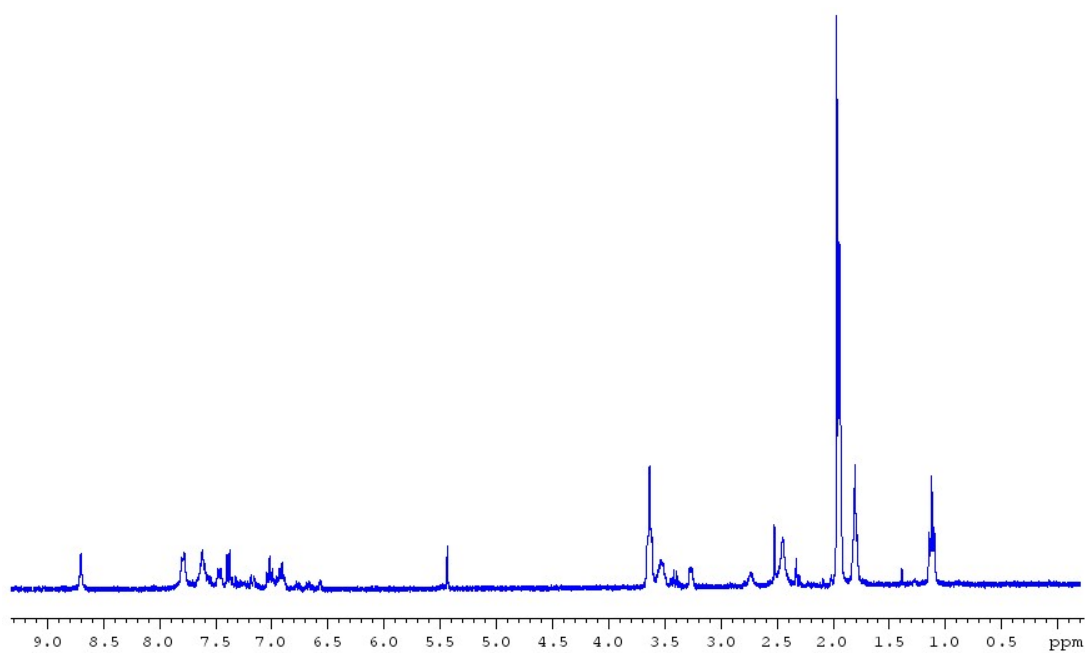

**Figure S26.** Crude  $^1\text{H}$  NMR spectrum of crude catalyst residue after reaction workup showing retention of imine C–H resonance.

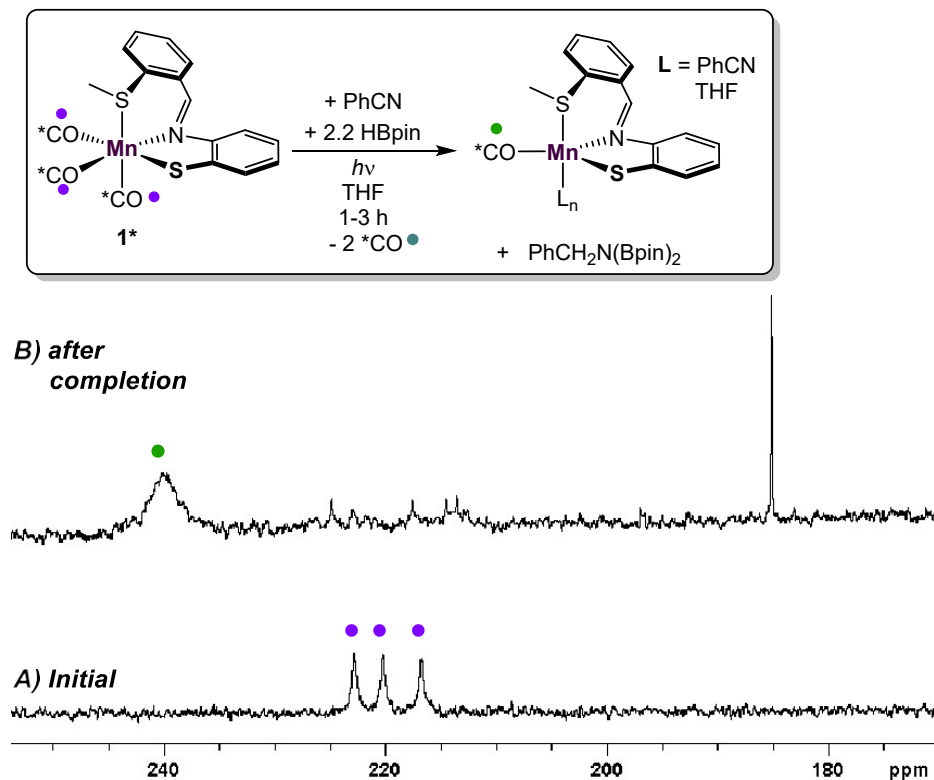

**Figure S27.** Stacked plot of  $^{13}\text{C}\{^1\text{H}\}$  spectra showing reaction of 10 mol%  $^{13}\text{C}$ -labelled **1\*** with benzonitrile and 2.2 equiv. of HBpin. (A) (Blue trace) Initial  $^{13}\text{C}\{^1\text{H}\}$  spectrum of reaction mixture prior to light exposure showing unreacted **1\***. (B)  $^{13}\text{C}\{^1\text{H}\}$  spectrum of reaction mixture after completion, showing disappearance of **1\*** and growth of a new species at 240 ppm.

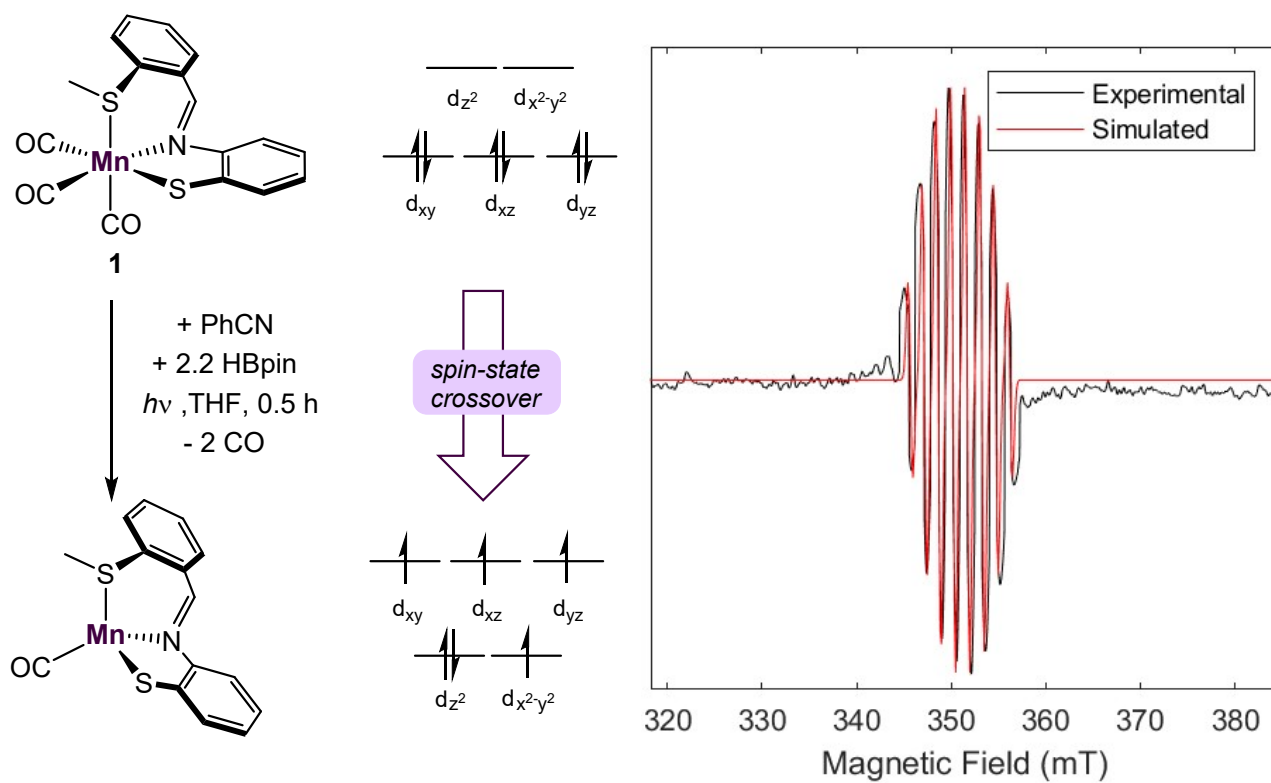

**Figure S28.** 298 K isotropic EPR spectrum of catalytic reaction mixture in THF after irradiation for 45 min.

## **VI. Crystallographic Details**

Crystals of **1** were mounted on thin glass fibers using cyanoacrylate glue and cooled to  $200 \pm 2$  K during data collection. The data were collected on a Bruker single-crystal diffractometer equipped with a sealed Mo tube source (wavelength 0.71073 Å) and APEX II CCD detector. The raw data collection and processing were performed with the Bruker APEX II software package.<sup>5</sup> Semi-empirical absorption correction based on equivalent reflections was applied.<sup>6</sup> Systematic absences and unit cell parameters were consistent with monoclinic  $P2_1/n$  (#14) for **1**. The structure was solved by intrinsic phasing and refined with a full-matrix least-squares procedure based on  $F^2$ , using SHELXL.<sup>7</sup> All non-hydrogen atoms were refined anisotropically. The hydrogen atoms bonded to carbon atoms were placed in idealized positions.

### **Refinement details for $\text{Mn}(\kappa^3\text{-S}^{\text{Me}}\text{NS})(\text{CO})_3$ (**1**).**

The structure was refined without additional restraints / constraints. No disorder was present.

**Table S1. Crystal data and structure refinement for  $\text{Mn}(\kappa^3\text{-S}^{\text{Me}}\text{NS})(\text{CO})_3$  (**1**).**

|                                               |                                                                     |
|-----------------------------------------------|---------------------------------------------------------------------|
| Identification code                           | tb271_fin                                                           |
| Empirical formula                             | $\text{C}_{17}\text{H}_{12}\text{MnNO}_3\text{S}_2$                 |
| Formula weight                                | 397.34                                                              |
| Temperature/K                                 | 200(2)                                                              |
| Crystal system                                | monoclinic                                                          |
| Space group                                   | $P2_1/n$                                                            |
| a/Å                                           | 9.0462(6)                                                           |
| b/Å                                           | 18.5124(13)                                                         |
| c/Å                                           | 9.7604(7)                                                           |
| $\alpha/^\circ$                               | 90                                                                  |
| $\beta/^\circ$                                | 93.8678(19)                                                         |
| $\gamma/^\circ$                               | 90                                                                  |
| Volume/Å <sup>3</sup>                         | 1630.8(2)                                                           |
| Z                                             | 4                                                                   |
| $\rho_{\text{calc}}/\text{cm}^3$              | 1.618                                                               |
| $\mu/\text{mm}^{-1}$                          | 1.080                                                               |
| F(000)                                        | 808.0                                                               |
| Crystal size/mm <sup>3</sup>                  | $0.390 \times 0.180 \times 0.100$                                   |
| Radiation                                     | MoK $\alpha$ ( $\lambda = 0.71073$ )                                |
| $2\Theta$ range for data collection/ $^\circ$ | 4.4 to 56.604                                                       |
| Index ranges                                  | $-12 \leq h \leq 11, -24 \leq k \leq 24, -13 \leq l \leq 12$        |
| Reflections collected                         | 19706                                                               |
| Independent reflections                       | 4034 [ $R_{\text{int}} = 0.0407$ ,<br>$R_{\text{sigma}} = 0.0347$ ] |
| Data/restraints/parameters                    | 4034/0/218                                                          |

|                                                |                                  |
|------------------------------------------------|----------------------------------|
| Goodness-of-fit on $F^2$                       | 1.025                            |
| Final R indexes [ $I \geq 2\sigma(I)$ ]        | $R_1 = 0.0326$ , $wR_2 = 0.0732$ |
| Final R indexes [all data]                     | $R_1 = 0.0525$ , $wR_2 = 0.0835$ |
| Largest diff. peak/hole / $e \text{ \AA}^{-3}$ | 0.42/-0.30                       |

**Table S2. Bond Lengths for  $\text{Mn}(\kappa^3\text{-S}^{\text{Me}}\text{NS})(\text{CO})_3$  (1).**

| Atom | Atom | Length/ $\text{\AA}$ | Atom | Atom | Length/ $\text{\AA}$ |
|------|------|----------------------|------|------|----------------------|
| C1   | C2   | 1.395(3)             | C11  | C12  | 1.386(3)             |
| C1   | C6   | 1.402(3)             | C12  | C13  | 1.382(3)             |
| C1   | S1   | 1.754(2)             | C13  | S2   | 1.784(2)             |
| C2   | C3   | 1.386(3)             | C14  | S2   | 1.794(2)             |
| C3   | C4   | 1.379(3)             | C15  | O1   | 1.146(3)             |
| C4   | C5   | 1.386(3)             | C15  | Mn1  | 1.797(2)             |
| C5   | C6   | 1.390(3)             | C16  | O2   | 1.149(3)             |
| C6   | N1   | 1.440(2)             | C16  | Mn1  | 1.805(2)             |
| C7   | N1   | 1.285(3)             | C17  | O3   | 1.143(3)             |
| C7   | C8   | 1.461(3)             | C17  | Mn1  | 1.802(2)             |
| C8   | C9   | 1.390(3)             | N1   | Mn1  | 2.0587(16)           |
| C8   | C13  | 1.409(3)             | S1   | Mn1  | 2.3898(6)            |
| C9   | C10  | 1.383(3)             | S2   | Mn1  | 2.3592(6)            |
| C10  | C11  | 1.376(3)             |      |      |                      |

## **VII. DFT Calculations**

All calculations were carried out using DFT<sup>8</sup> as implemented in the Jaguar 9.1 suite<sup>9</sup> of *ab initio* quantum chemistry programs. Geometry optimizations were performed with the B3LYP functional including Grimme's D3 dispersion correction.<sup>10-15</sup> The 6-31G\*\* basis set was used for main group atoms and Mn was represented using the Los Alamos LACVP basis set that includes relativistic effective core potentials. The energies of optimized structures were reevaluated by additional single-point calculations on each optimized geometry using Dunning's correlation consistent triple- $\zeta$  basis set cc-pVTZ(-f)<sup>16</sup> which includes a double set of polarization functions. For Mn, we used a modified version of LACVP, designated as LACV3P, in which the exponents were decontracted to match the effective core potential with the triple- $\zeta$  quality. For boron, the 6-311G\*\* basis set was used. Solvation energies were evaluated by a self-consistent reaction field (SCRF)<sup>17-20</sup> approach based on accurate numerical solutions of the Poisson-Boltzmann equation. In the results reported, solvation calculations were carried out at the same level of theory as the geometry optimization, employing a dielectric constant of  $\epsilon = 2.284$  for benzene. As is the case for all continuum models, the



solvation energies are subject to empirical parameterization of the atomic radii that are used to generate the solute surface. We employed the standard set of Van der Waals radii in Jaguar for H (1.150 Å), B(2.042 Å), C(1.900 Å), N(1.600 Å), O (1.600 Å), S(1.900 Å) and Mn (1.480 Å). Analytical vibrational frequencies within the harmonic approximation were computed with the 6-31G\*\*/LACVP basis set to confirm proper convergence to well-defined minima or saddle points on the potential energy surface. The intermediates were confirmed with no vibrational frequency, while transition states showed a single imaginary frequency.

The energy components have been computed with the following protocol. The free energy in solution-phase,  $G(\text{sol})$ , has been calculated as follows, with  $T = 298$  K to match the experimental room temperature conditions:

$$G(\text{sol}) = G(\text{gas}) + G_{\text{solv}}$$

$$G(\text{gas}) = H(\text{gas}) - TS(\text{gas})$$

$$H(\text{gas}) = E(\text{SCF}) + \text{ZPE}$$

$$\Delta E(\text{SCF}) = \sum E(\text{SCF}) \text{ for products} - \sum E(\text{SCF}) \text{ for reactants}$$

$$\Delta G(\text{sol}) = \sum G(\text{sol}) \text{ for products} - \sum G(\text{sol}) \text{ for reactants}$$

Time dependent-density functional theory (TD-DFT) calculations were used to model dissociation of carbonyls upon UV light irradiation. Calculations were carried out with the Q-Chem 5.0 software. Using geometry obtained from the above method, TD-DFT calculations were carried out with the B3LYP-D3 functional and 6-31G\*\*/LACVP basis set.

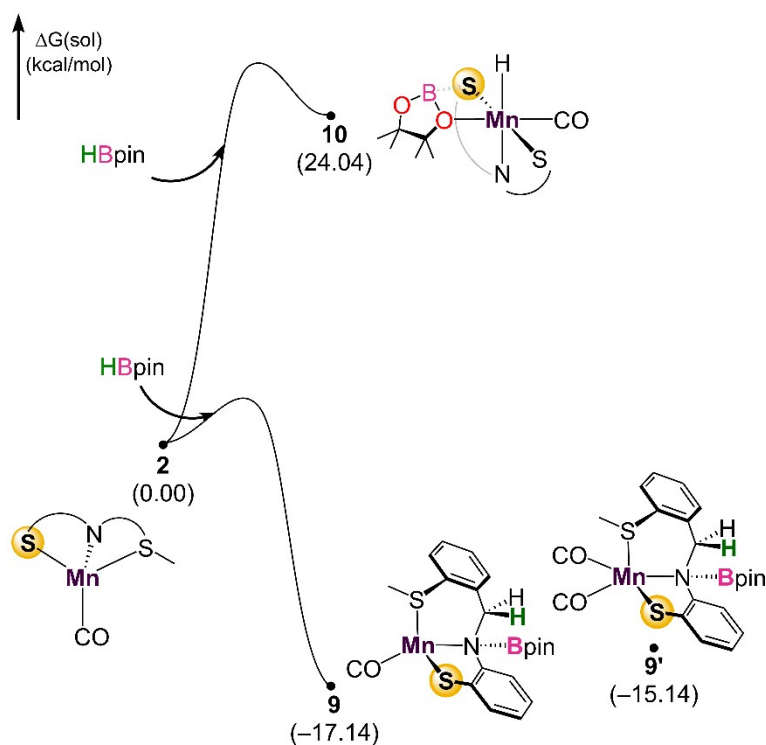

**Figure S29.** Thermodynamics of the off-cycle intermediate **9** and a proposed Mn–H species.

Two undesirable intermediates **9** and **10** are depicted in **Figure S29**. In accordance with the catalytic incapability of the off-cycle intermediate **9**, HBpin insertion to imine gives rise to a highly exergonic pathway. The intermediate **9** will be a thermodynamic sink considering further hydride transfer steps. Additional CO can bind to **9** resulting in **9'**, while the two energetically close intermediates are unable to participate in the catalytic cycle. Manganese hydride species, **10** is 23.8 kcal/mol higher in energy than **2**. Coordination of nitrile followed by a Bpin moiety transfer step will furnish a more unreasonable pathway than the proposed mechanism in terms of energy. We envision that the instability of the Manganese hydride species is attributed to the SNS ligand scaffold generating a weak ligand field. The catalytic pathway initiates with removing two COs which are strong field ligands. Regarding the Mn(I) center supported by the soft SNS ligand, the hydride moiety which contains dense electrons is placed in a deleterious environment.

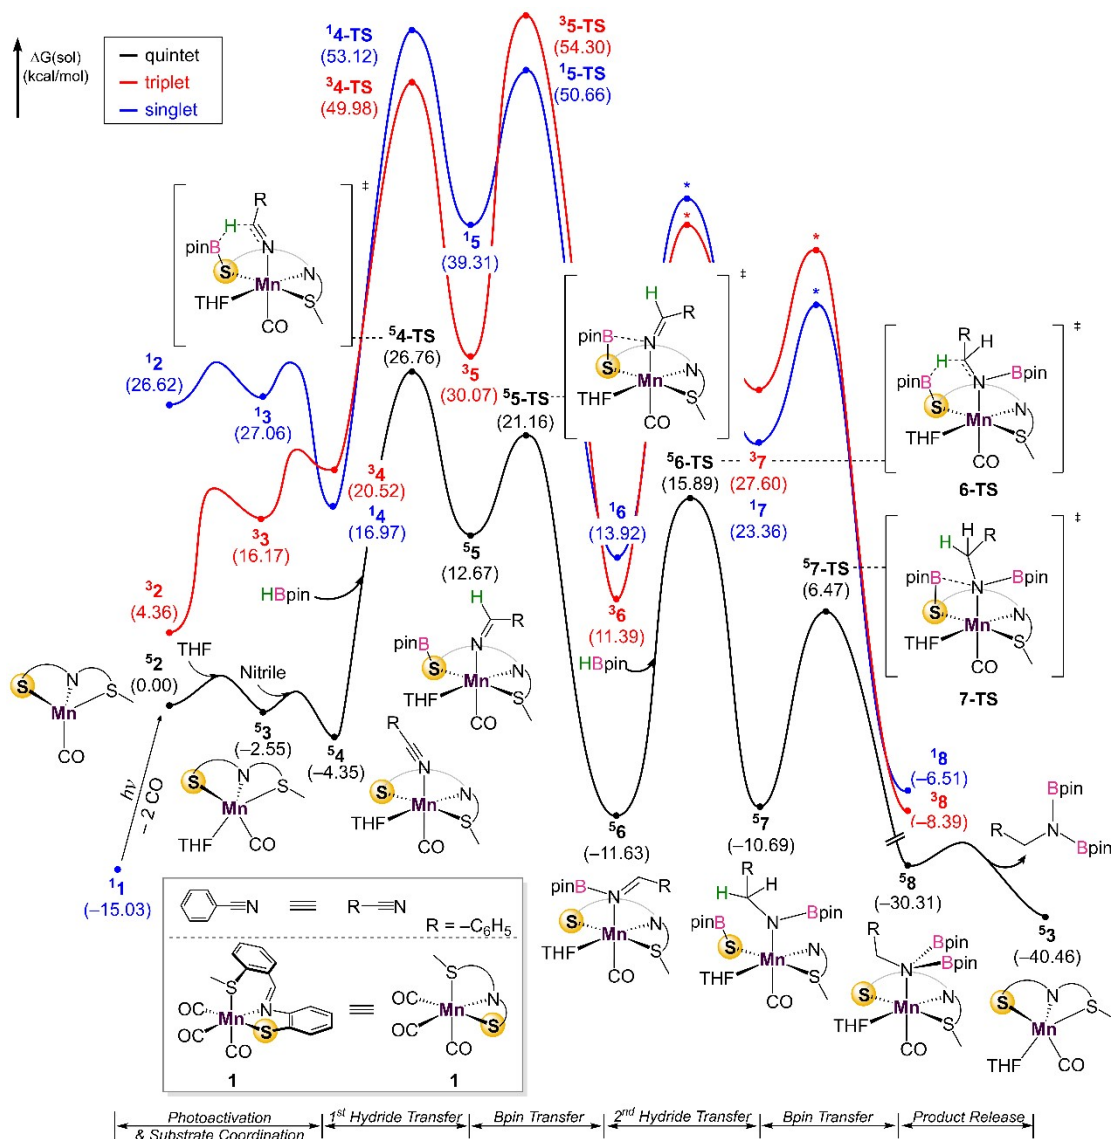

Figure S30. Energy profile including all spin states.

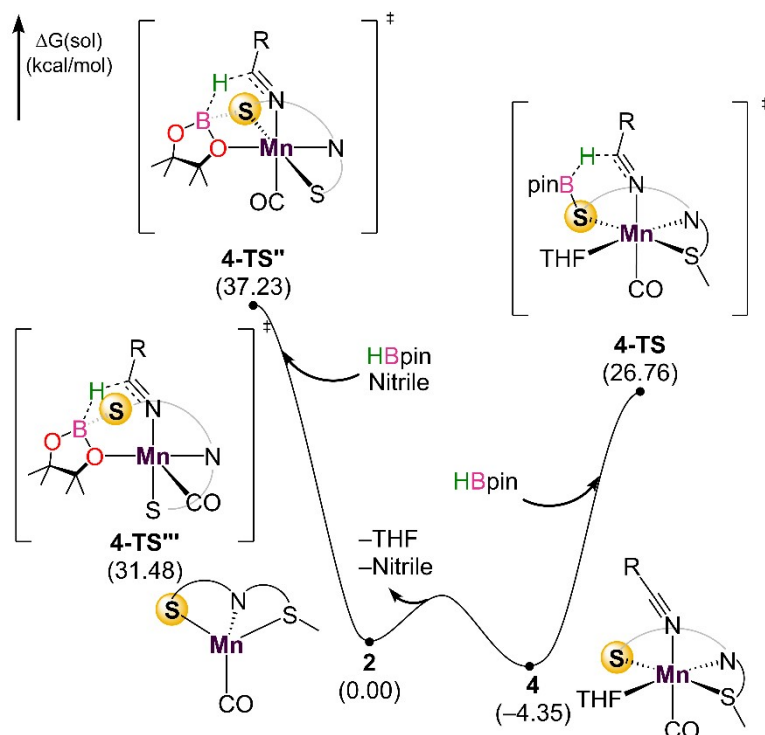

**Figure S31.** Energy profile for the hydride transfer in the presence and absence of coordinating THF.

The oxygen atom of HBpin can bind to the Mn center in lieu of THF as depicted in **4-TS''**. In the outer sphere mechanism traversing **4-TS**, the  $\pi$ -accepting CO ligand should be in the trans position to the transient amido moiety. In compliance with the formation of a sterically hindered Mn–S–B–O metallacycle in **4-TS''**, a conformer featuring a distinct position of the CO ligand trans to the thiolate moiety, **4-TS'''** is favored by 5.8 kcal/mol. Due to the strong trans effect of the CO ligand, the thiolate moiety departs from the Mn center resulting in 3.6 Å of Mn–S distance. Relieved structural hindrance is reflected in the lower barrier of 35.8 kcal/mol, while the proposed pathway traversing **4-TS** having barrier of 31.1 kcal/mol is still favored. The amido species generated during hydride transfer in **4-TS'''** is not stabilized by an electron-withdrawing ligand. Moreover, the Mn(I) species adopts a trigonal bipyramidal geometry giving rise to the 16-electron species as Mn–S bond cleaves, while **4-TS** affords 18-electron species comprising the stabilized amido moiety.

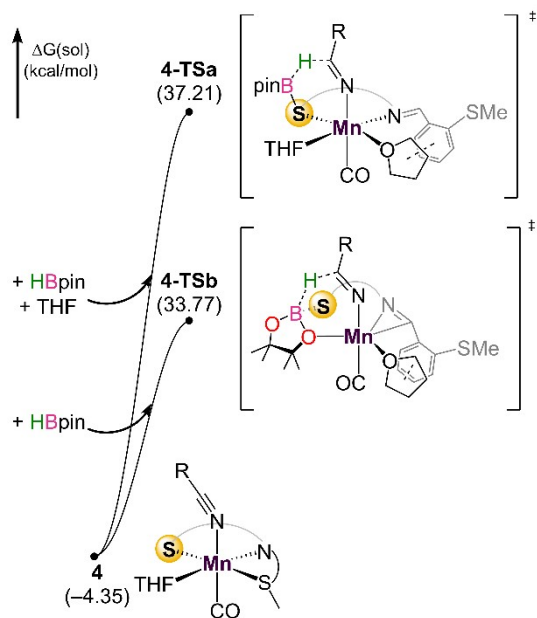

**Figure S32.** Possible pathways incorporating the cleavage of the thioether group.

|               | B3LYP-D3 | M06   |
|---------------|----------|-------|
| <b>4-TS</b>   | 26.76    | 30.04 |
| <b>4-TS'</b>  | 33.92    | 38.10 |
| <b>4-TS''</b> | 34.89    | 33.66 |

B3LYP-D3 & M06/cc-pVTZ(-f)//B3LYP-D3 & M06/LACVP\*\*PCM ( $\epsilon = 7.6$  for THF)  
 Energies in kcal·mol<sup>-1</sup>  
 Referenced to [SNS]Mn(CO)(THF)

**Figure S33.** Comparison between the B3LYP-D3 functional and M06 functional.

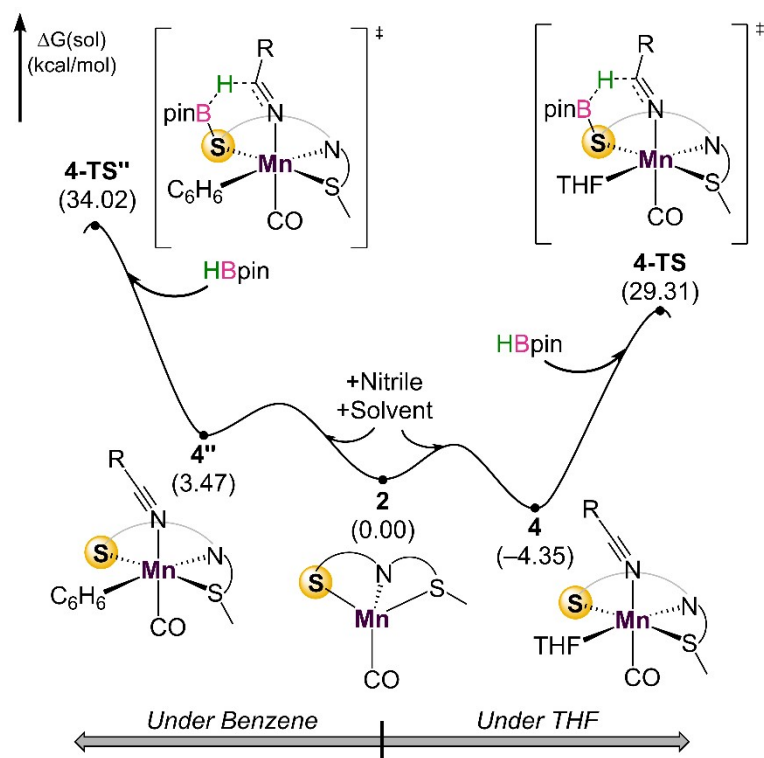

**Figure S34.** Comparison of the energy profiles for the reaction under THF and benzene as the solvent.

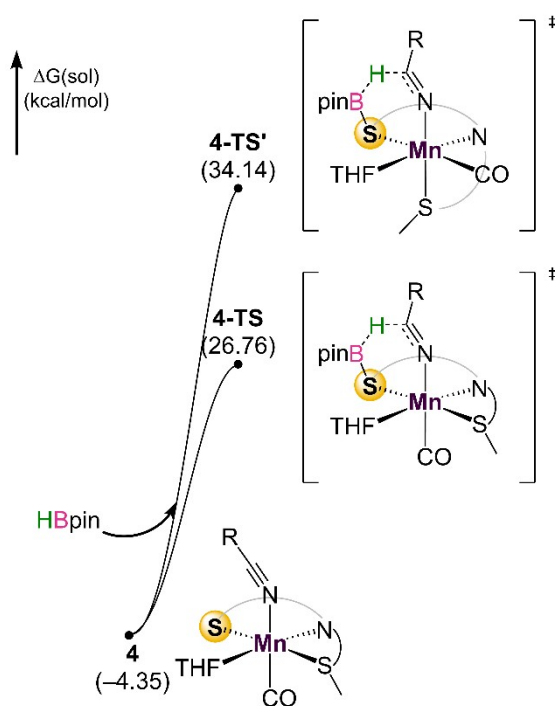

**Figure S35.** Comparison between *fac*- and *mer*-conformations in the turnover-limiting transition state.

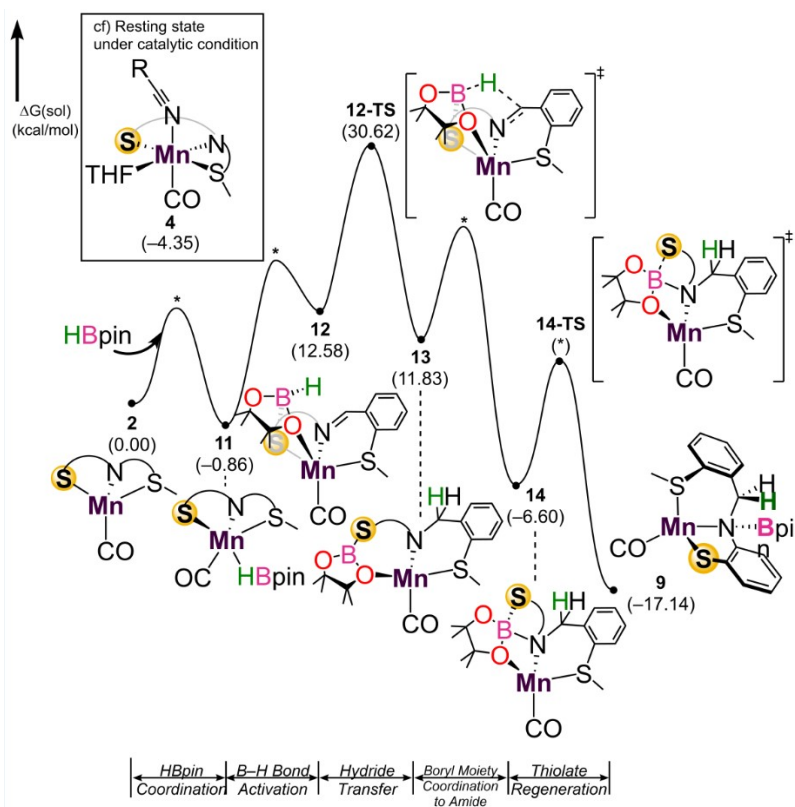

Figure S36. Off-cycle pathway in the absence of benzonitrile.

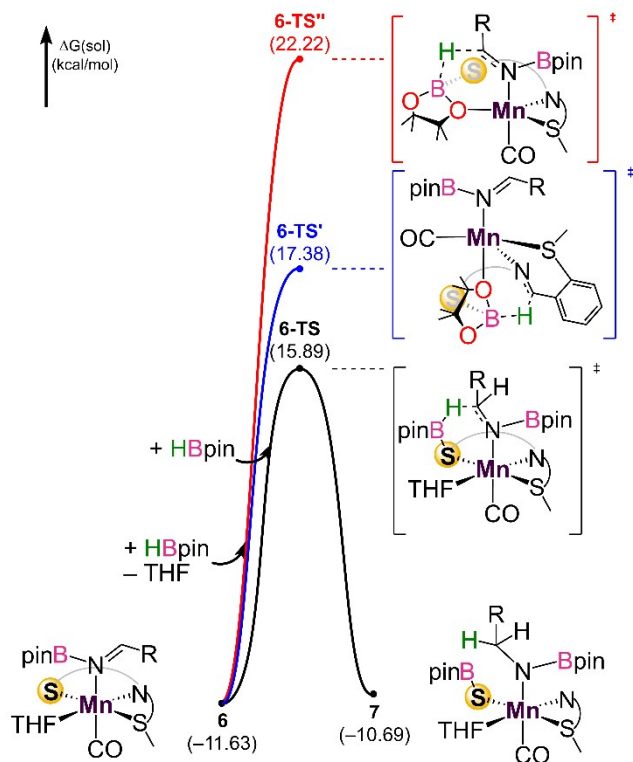

Figure S37. Comparison of transition states related to THF dissociation in intermediate 6.

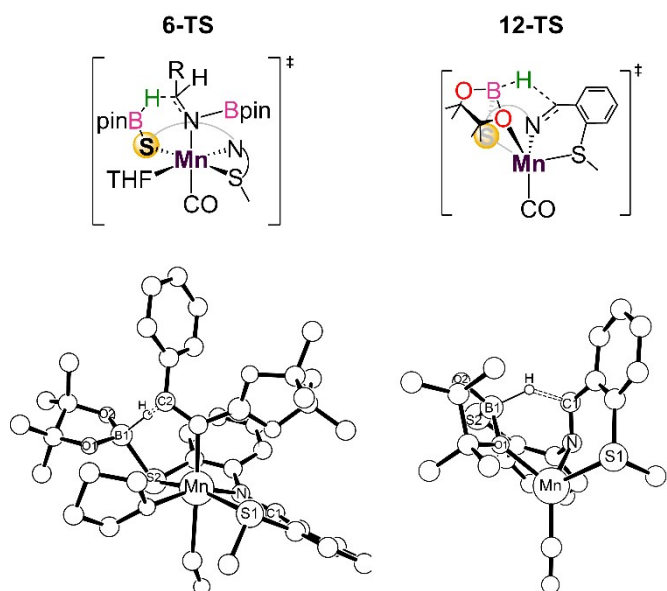

**Figure S38.** Comparison of 3D structures of **6-TS** and **12-TS**.

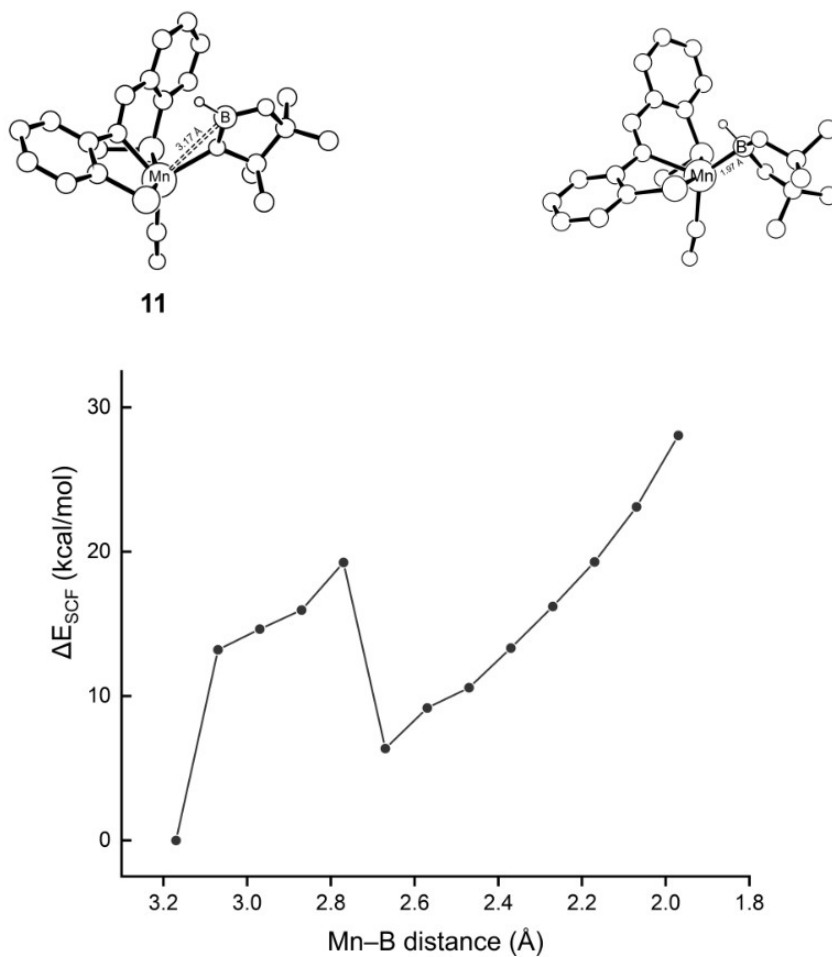

**Figure S39.** Scanning the potential energy surface of the Mn–B in **11**. Forced geometries are unstable and an adduct could not be optimized.



**Table S3** Computed energy components for DFT optimized structures

|                               | <b>E<sub>SCF</sub> (eV)</b>      | <b>ZPE (kcal/mol)</b>       | <b>S<sub>gas</sub> (cal/mol·K)</b> | <b>G<sub>solv</sub> (kcal/mol)</b> |
|-------------------------------|----------------------------------|-----------------------------|------------------------------------|------------------------------------|
| Label                         | B3LYP-D3/<br>cc-pVTZ(-f), LACV3P | B3LYP-D3/<br>6-31G**, LACVP | B3LYP-D3/<br>6-31G**, LACVP        | B3LYP-D3/<br>6-31G**, LACVP        |
| Benzene                       | -6322.006                        | 63.16                       | 64.09                              | -2.30                              |
| Benzonitrile                  | -8832.844                        | 62.36                       | 77.13                              | -6.64                              |
| CO                            | -3084.527                        | 3.15                        | 47.24                              | 0.00                               |
| Diborylamine (product)        | -31259.999                       | 308.87                      | 175.52                             | -8.57                              |
| HBpin                         | -11211.936                       | 120.07                      | 90.99                              | -4.11                              |
| Off-cycle<br>intermediate, 9  | -55009.910                       | 268.56                      | 196.53                             | -13.45                             |
| Off-cycle<br>intermediate, 9' | -58094.859                       | 272.97                      | 212.01                             | -12.46                             |
| Mn–H species, 10              | -55007.832                       | 261.43                      | 199.82                             | -12.08                             |
| THF                           | -6327.710                        | 73.37                       | 72.17                              | -3.00                              |
| 1                             | -49967.473                       | 157.97                      | 158.41                             | -12.77                             |
| 2                             | -43796.262                       | 144.76                      | 152.64                             | -13.91                             |
| <sup>3</sup> 2                | -43796.222                       | 146.54                      | 143.33                             | -15.03                             |
| <sup>1</sup> 2                | -43795.191                       | 146.38                      | 140.66                             | -17.18                             |
| 3                             | -50124.836                       | 219.11                      | 181.93                             | -10.96                             |
| <sup>3</sup> 3                | -50124.270                       | 220.76                      | 171.66                             | -12.35                             |
| <sup>1</sup> 3                | -50123.898                       | 221.55                      | 165.65                             | -12.62                             |
| 4                             | -58958.301                       | 281.25                      | 229.29                             | -13.74                             |
| <sup>3</sup> 4                | -58957.422                       | 281.90                      | 226.35                             | -13.01                             |
| <sup>1</sup> 4                | -58957.827                       | 285.05                      | 206.11                             | -16.40                             |
| 4''                           | -58952.280                       | 270.71                      | 227.52                             | -12.64                             |
| 4-TS                          | -70170.020                       | 401.65                      | 260.80                             | -9.74                              |
| <sup>3</sup> 4-TS             | -63840.801                       | 327.80                      | 223.89                             | -9.73                              |
| <sup>1</sup> 4-TS             | -63840.674                       | 330.01                      | 212.40                             | -15.16                             |

|                   |            |        |        |        |
|-------------------|------------|--------|--------|--------|
| 4-TS'             | -70169.685 | 401.79 | 256.36 | -11.63 |
| 4-TS''            | -70163.979 | 391.06 | 259.77 | -9.51  |
| 4-TS'''           | -63841.398 | 327.03 | 228.67 | -12.06 |
| 4-TSa             | -76497.964 | 476.08 | 291.76 | -10.11 |
| 4-TSb             | -70169.490 | 401.30 | 259.59 | -14.83 |
| 5                 | -70170.604 | 403.47 | 271.63 | -9.02  |
| <sup>3</sup> 5    | -70170.281 | 405.70 | 251.88 | -9.54  |
| <sup>1</sup> 5    | -70169.978 | 406.46 | 244.90 | -10.12 |
| 5-TS              | -70170.458 | 403.60 | 255.16 | -8.94  |
| <sup>3</sup> 5-TS | -70169.428 | 406.29 | 241.56 | -8.64  |
| <sup>1</sup> 5-TS | -70169.560 | 406.28 | 240.76 | -9.46  |
| 6                 | -70171.500 | 404.85 | 263.68 | -16.42 |
| <sup>3</sup> 6    | -70170.759 | 405.50 | 264.45 | -13.24 |
| <sup>1</sup> 6    | -70170.895 | 408.61 | 243.93 | -16.81 |
| 6-TS              | -81383.325 | 525.13 | 302.74 | -11.26 |
| 6-TS'             | -75054.799 | 449.65 | 273.71 | -12.96 |
| 6-TS''            | -75054.763 | 450.32 | 264.63 | -12.32 |
| 7                 | -81384.497 | 527.19 | 309.92 | -10.73 |
| <sup>3</sup> 7    | -81383.115 | 527.29 | 298.63 | -10.12 |
| <sup>1</sup> 7    | -81383.593 | 531.77 | 284.36 | -12.07 |
| 7-TS              | -81383.854 | 527.17 | 300.66 | -11.14 |
| 8                 | -81385.333 | 529.09 | 306.50 | -14.09 |
| <sup>3</sup> 8    | -81384.562 | 529.90 | 303.23 | -13.97 |
| <sup>1</sup> 8    | -81384.644 | 532.29 | 290.02 | -16.54 |
| 11                | -55008.981 | 265.15 | 202.88 | -13.51 |
| 12                | -55008.567 | 265.26 | 198.82 | -10.93 |

|       |            |        |        |        |
|-------|------------|--------|--------|--------|
| 12-TS | -55007.865 | 264.64 | 190.96 | -10.60 |
| 13    | -55008.701 | 267.43 | 196.90 | -11.13 |
| 14    | -55009.578 | 268.29 | 190.56 | -12.08 |

**Table S4** Coordinates and vibrational frequencies for optimized structure

**Coordinates**

=====  
Benzene  
=====

C1 2.850831 0.621417 2.515819  
 C2 1.541382 0.520834 2.990118  
 C3 3.355939 1.860838 2.117780  
 H4 1.148406 -0.443438 3.299794  
 H5 4.374694 1.939092 1.748774  
 C6 0.737040 1.659674 3.066378  
 C7 2.551596 2.999677 2.194039  
 H8 -0.281715 1.581419 3.435384  
 H9 2.944572 3.963950 1.884363  
 C10 1.242147 2.899094 2.668338  
 H11 0.616368 3.785113 2.727668  
 H12 3.476610 -0.264602 2.456489

=====  
Benzonitrile  
=====

C1 -1.356772 -0.000004 -3.530825  
 C2 -2.514299 -0.355166 -2.834338  
 C3 -0.199246 0.355152 -2.834328  
 H4 -3.413275 -0.631047 -3.376948  
 H5 0.699736 0.631035 -3.376931  
 C6 -2.521015 -0.357164 -1.441759  
 C7 -0.192562 0.357137 -1.441754  
 H8 -3.414855 -0.631366 -0.891723  
 H9 0.701272 0.631334 -0.891703  
 C10 -1.356802 -0.000016 -0.741197  
 H11 -1.356768 0.000004 -4.616845  
 C12 -1.356735 0.000006 0.693504  
 N13 -1.356608 0.000049 1.856712

=====  
CO  
=====

C1 -0.293499 0.001892 -2.165194  
 O2 -0.830929 0.125413 -3.161392

=====  
Diborylamine  
=====

C1 -5.331882 0.197436 -2.942489  
 C2 -5.378927 1.307495 -1.827688  
 O3 -3.977584 1.658762 -1.686571  
 C4 -6.108842 2.578547 -2.281694  
 C5 -5.905872 0.845054 -0.473550  
 O6 -4.183976 0.608677 -3.727321  
 C7 -6.553298 0.143099 -3.855053  
 C8 -5.017514 -1.196470 -2.384712  
 B9 -3.383559 1.366610 -2.892335  
 H10 -2.012096 0.410873 -4.883020  
 H11 -5.746888 2.906529 -3.260625  
 H12 -7.190572 2.425322 -2.341968  
 H13 -5.907392 3.375066 -1.560511  
 H14 -6.423249 -0.649871 -4.597280  
 H15 -7.458137 -0.073498 -3.277249

H16 -6.692971 1.083820 -4.389763  
 H17 -5.890820 1.681178 0.231333  
 H18 -6.937875 0.489088 -0.562191  
 H19 -5.291444 0.044089 -0.059362  
 H20 -4.150529 -1.162818 -1.718725  
 H21 -5.866311 -1.612892 -1.833851  
 H22 -4.781355 -1.864220 -3.217775  
 C23 -3.163293 4.437554 -6.485276  
 C24 -2.921726 4.100146 -7.819427  
 C25 -2.280319 2.892947 -8.115683  
 H26 -3.232086 4.765479 -8.620485  
 H27 -3.665476 5.370767 -6.240303  
 C28 -2.765256 3.580690 -5.455264  
 H29 -2.972505 3.848629 -4.421999  
 C30 -2.124811 2.371093 -5.741823  
 H31 -2.090186 2.613870 -9.151199  
 C32 -1.888209 2.039549 -7.085419  
 H33 -1.392659 1.099672 -7.325395  
 C34 -1.648312 1.417480 -4.653602  
 N35 -2.078862 1.785781 -3.298245  
 C36 -0.448725 4.066184 -0.952034  
 C37 0.354409 4.276680 -2.288241  
 O38 -1.621453 3.343421 -1.409054  
 C39 -0.904894 5.349882 -0.265002  
 C40 0.280816 3.157062 0.044506  
 O41 -0.027174 3.105566 -3.055660  
 C42 -0.116495 5.501753 -3.084219  
 C43 1.871473 4.291791 -2.135950  
 B44 -1.265321 2.714798 -2.581280  
 H45 -1.206253 5.510933 -3.178073  
 H46 0.202838 6.437463 -2.615031  
 H47 0.305478 5.451285 -4.091504  
 H48 2.338420 4.431002 -3.115333  
 H49 2.185413 5.115960 -1.486526  
 H50 2.239476 3.353972 -1.716377  
 H51 -1.458781 5.102744 0.645208  
 H52 -0.043434 5.966014 0.013909  
 H53 -1.561504 5.935333 -0.910763  
 H54 0.632974 2.245170 -0.446234  
 H55 1.137745 3.662349 0.500564  
 H56 -0.417687 2.869875 0.834955  
 H57 -0.554033 1.384387 -4.676394

=====  
HBpin  
=====

C1 1.732851 3.125565 2.270194  
 C2 1.678059 3.555808 3.786512  
 B3 1.521066 5.383667 2.441474  
 H4 1.417159 6.521531 2.113864  
 O5 1.304723 4.339117 1.585048  
 O6 1.866451 4.999959 3.708139  
 C7 3.153034 2.824263 1.775798  
 H8 3.840873 3.631171 2.042615  
 H9 3.533496 1.887314 2.192981  
 H10 3.137358 2.739934 0.685998  
 C11 2.780080 2.970677 4.665079

H12 2.667749 3.338863 5.688617  
H13 2.716251 1.877657 4.685592  
H14 3.771397 3.257599 4.311313  
C15 0.787884 1.990831 1.885264  
H16 0.885061 1.779129 0.816856  
H17 1.034739 1.078713 2.438507  
H18 -0.253111 2.250311 2.083459  
C19 0.305220 3.330532 4.433076  
H20 -0.493724 3.750811 3.816160  
H21 0.104906 2.266684 4.589758  
H22 0.283572 3.834958 5.402530

=====  
Off-cycle intermediate, 9'  
=====

Mn1 -1.038075 -0.275055 -0.493579  
C2 -2.886073 0.103722 -0.065677  
O3 -4.004996 0.306791 0.191284  
N4 0.310911 -1.346103 0.988567  
C5 1.618770 -0.685438 0.992607  
C6 1.983102 0.228719 -0.017674  
C7 3.286398 0.764706 0.041190  
C8 4.176402 0.419298 1.051185  
C9 3.794828 -0.475836 2.055588  
C10 2.514609 -1.019176 2.014362  
H11 2.196621 -1.722970 2.781033  
H12 4.479031 -0.741328 2.855577  
H13 5.170989 0.857649 1.059606  
H14 3.584554 1.470254 -0.728182  
S15 0.906392 0.749833 -1.331910  
C16 0.409230 -2.800323 0.605015  
C17 1.123090 -3.024705 -0.709904  
C18 0.481661 -2.901834 -1.957191  
C19 1.190980 -3.114265 -3.142341  
C20 2.551903 -3.413845 -3.100195  
C21 3.205455 -3.520247 -1.874650  
C22 2.486834 -3.334910 -0.695622  
H23 2.994128 -3.399565 0.262421  
H24 4.267261 -3.743192 -1.834966  
H25 3.096052 -3.561604 -4.028637  
H26 0.694665 -3.036373 -4.102824  
S27 -1.264931 -2.455148 -1.990064  
C28 -1.400718 -1.517566 -3.559083  
H29 -2.350300 -0.981244 -3.503824  
H30 -0.574383 -0.805650 -3.617488  
H31 -1.409865 -2.188841 -4.419246  
H32 0.943543 -3.341257 1.393858  
C33 -1.154200 -0.142602 4.131200  
C34 -1.949532 -1.488835 3.886975  
O35 -1.182562 -2.115532 2.813629  
C36 -1.967785 -2.446088 5.074201  
C37 -3.368353 -1.275368 3.353606  
O38 -0.513592 0.089742 2.846157  
C39 -0.020298 -0.278287 5.153889  
C40 -2.027491 1.063937 4.457517  
B41 -0.470224 -1.116125 2.204455  
H42 -0.609376 -3.195682 0.590878  
H43 -0.959301 -2.742824 5.366831  
H44 -2.460935 -1.981405 5.934063  
H45 -2.524004 -3.349562 4.808917

H46 0.596117 0.623567 5.114946  
H47 -0.404609 -0.397750 6.170960  
H48 0.621453 -1.132417 4.918779  
H49 -3.769132 -2.237901 3.023121  
H50 -4.027736 -0.874848 4.129051  
H51 -3.379122 -0.594419 2.501316  
H52 -2.732105 1.273857 3.651350  
H53 -2.588064 0.894829 5.382851  
H54 -1.396494 1.946408 4.594602

=====  
Off-cycle intermediate, 9'  
=====

Mn -0.875688358 -0.041342832 -0.643521367  
C -1.474169940 1.355516870 0.670474165  
O -1.716776656 2.260125491 1.336145510  
N 0.748396042 -1.541970602 1.289364314  
C 1.921937625 -0.698144251 1.349989643  
C 2.265839628 0.205161556 0.319944309  
C 3.440036136 0.967762990 0.490786765  
C 4.240782610 0.844596016 1.620303974  
C 3.892976024 -0.053155297 2.632856093  
C 2.738358121 -0.814686021 2.483268244  
H 2.442961535 -1.517133979 3.259232645  
H 4.506370062 -0.154709966 3.523226790  
H 5.135356103 1.455206042 1.711942493  
H 3.710752257 1.670932834 -0.290865991  
S 1.358316260 0.433890585 -1.191880937  
C 0.999660949 -2.919047198 0.794272286  
C 1.195952669 -3.008657783 -0.702650200  
C 0.118200741 -2.891784174 -1.603174074  
C 0.332826412 -2.936564964 -2.981294620  
C 1.627127294 -3.099397351 -3.477389298  
C 2.703303833 -3.213727969 -2.602682514  
C 2.478701803 -3.170789244 -1.227307240  
H 3.315888272 -3.240450297 -0.538230380  
H 3.712635194 -3.325392789 -2.986727128  
H 1.786585752 -3.124225011 -4.551491265  
H -0.487818795 -2.827313965 -3.679917951  
S -1.511463862 -2.578199956 -0.893844259  
C -2.631908471 -2.664373580 -2.330688126  
H -3.634887203 -2.496486321 -1.932658553  
H -2.402062917 -1.890574525 -3.064609487  
H -2.582781483 -3.655477613 -2.786018482  
H 1.890549153 -3.317163741 1.296089011  
C -1.403747803 -0.508576513 4.049833620  
C -2.184750938 -1.730216787 3.434822111  
O -1.163980226 -2.361144569 2.615154267  
C -2.692187697 -2.747223466 4.450465779  
C -3.316537508 -1.310187110 2.488219338  
O -0.438328114 -0.207919630 3.006683086  
C -0.596083136 -0.881462443 5.298984350  
C -2.249376019 0.732262855 4.316617888  
B -0.253216603 -1.371894039 2.294119063  
H 0.151016099 -3.536360677 1.101319159  
H -1.870625649 -3.180789276 5.023136779  
H -3.396972456 -2.278619207 5.145243113  
H -3.210233196 -3.559617383 3.932638695  
H 0.089871056 -0.062105388 5.529753922  
H -1.243420395 -1.050576123 6.164594175

H -0.001525332 -1.783351666 5.125379971  
H -3.668223470 -2.193056866 1.947104638  
H -4.159117716 -0.873043196 3.031356336  
H -2.961054852 -0.582597436 1.752664650  
H -2.712727231 1.110837210 3.405628601  
H -3.033555130 0.509526426 5.048033812  
H -1.616886825 1.526557899 4.722849123  
O -2.303558261 1.061502329 -3.251119758  
C -1.860544582 0.638963582 -2.275199127

Mn-H species, 10

Mn1 -1.452986 -0.822408 -0.987755  
C2 -1.424118 -3.383376 -0.844131  
O3 -1.643035 -4.492815 -0.732747  
N4 0.589123 -0.865196 -0.499679  
C5 1.208622 0.054397 0.347620  
C6 0.503375 0.763689 1.354168  
C7 1.151063 1.706755 2.155769  
C8 2.508261 1.981525 1.992937  
C9 3.219079 1.299120 1.004049  
C10 2.583205 0.361815 0.199170  
H11 3.135554 -0.129099 -0.596135  
H12 4.274318 1.507690 0.846918  
H13 2.996535 2.717023 2.624646  
H14 0.578675 2.220491 2.922351  
S15 -1.243524 0.439728 1.711234  
C16 1.361522 -1.901706 -0.931475  
C17 1.185346 -2.699258 -2.096744  
C18 0.362569 -2.417845 -3.244693  
C19 0.237251 -3.349047 -4.281444  
C20 0.908146 -4.569450 -4.250608  
C21 1.765359 -4.843983 -3.169498  
C22 1.904930 -3.936077 -2.140803  
H23 2.557460 -4.170783 -1.303079  
H24 2.319438 -5.778287 -3.138099  
H25 0.786985 -5.281664 -5.060345  
H26 -0.391568 -3.097693 -5.130968  
S27 -0.527373 -0.875028 -3.471312  
C28 0.838944 0.355387 -3.475715  
H29 0.350300 1.347078 -3.793134  
H30 1.291476 0.432550 -2.425869  
H31 1.618029 0.022599 -4.263683  
H32 2.191067 -2.198789 -0.286089  
C33 -3.500274 2.887267 -0.591190  
C34 -2.259670 2.635077 -1.533589  
O35 -1.538531 1.572460 -0.814425  
C36 -2.619988 2.116091 -2.920185  
C37 -1.286018 3.811326 -1.615347  
O38 -3.002552 2.456516 0.721705  
C39 -4.700486 1.991396 -0.909910  
C40 -3.920337 4.348188 -0.484076  
B41 -1.980089 1.600668 0.496928  
H42 -3.169962 -0.948457 -0.920250  
H43 -3.112077 1.143507 -2.859574  
H44 -3.283761 2.821547 -3.429964  
H45 -1.717747 2.007422 -3.526625  
H46 -5.438139 2.097312 -0.109659  
H47 -5.171219 2.283568 -1.853452

H48 -4.401252 0.940141 -0.966369  
H49 -0.371644 3.478714 -2.114477  
H50 -1.713388 4.641289 -2.185141  
H51 -1.015166 4.170283 -0.618774  
H52 -3.113471 4.976740 -0.102679  
H53 -4.226988 4.726357 -1.465113  
H54 -4.771500 4.434936 0.196133

THF

H1 -0.970467 -0.001838 -3.396327  
O2 0.386955 0.367352 -1.865922  
C3 0.145626 -0.323432 -0.636131  
C4 -1.327212 -0.756304 -0.663309  
C5 -1.958525 0.378171 -1.484006  
C6 -0.855536 0.651458 -2.516544  
H7 0.840807 -1.168195 -0.560065  
H8 0.340907 0.352010 0.212195  
H9 -1.757754 -0.868401 0.335593  
H10 -1.435846 -1.711810 -1.189407  
H11 -2.119036 1.259854 -0.852778  
H12 -2.914854 0.110269 -1.941598  
H13 -0.843669 1.690071 -2.868432

I

Mn1 -0.009895 -0.007277 -0.021713  
C2 1.284727 0.179190 1.234747  
O3 2.105600 0.307977 2.031955  
C4 -0.245064 1.783746 -0.104581  
O5 -0.396920 2.924648 -0.206327  
C6 -1.279145 -0.220139 1.245823  
O7 -2.072422 -0.328572 2.081037  
N8 0.391661 -2.032683 -0.307678  
C9 1.784801 -2.324656 -0.428184  
C10 2.562018 -1.351757 -1.097389  
C11 3.921867 -1.641902 -1.310214  
C12 4.483275 -2.827093 -0.846066  
C13 3.708513 -3.761046 -0.145662  
C14 2.355230 -3.508939 0.056005  
H15 1.747561 -4.207205 0.625032  
H16 4.159510 -4.664233 0.252934  
H17 5.541623 -3.014907 -1.005790  
H18 4.534816 -0.910009 -1.827131  
S19 1.819020 0.154641 -1.627502  
C20 -0.454420 -2.996707 -0.453718  
C21 -1.914914 -2.856066 -0.468366  
C22 -2.588609 -1.745118 -1.033076  
C23 -3.983880 -1.714370 -1.032310  
C24 -4.717147 -2.763298 -0.472611  
C25 -4.065460 -3.872557 0.063406  
C26 -2.674470 -3.918962 0.043336  
H27 -2.153779 -4.782100 0.450146  
H28 -4.633080 -4.695184 0.485956  
H29 -5.801788 -2.711034 -0.470220  
H30 -4.516849 -0.877848 -1.467478  
S31 -1.590463 -0.460387 -1.808055  
C32 -2.762248 0.932104 -1.927157  
H33 -2.159415 1.793014 -2.221198

H34 -3.517651 0.743579 -2.691869  
H35 -3.222850 1.128619 -0.956921  
H36 -0.079233 -4.010728 -0.611155

2

Mn1 0.025025 -0.797409 0.603353  
C2 -1.372434 -0.715737 1.962152  
O3 -2.188727 -0.592090 2.779395  
N4 0.586500 -2.275138 -0.837257  
C5 1.964397 -2.367655 -1.124419  
C6 2.834453 -1.423265 -0.509119  
C7 4.210912 -1.525969 -0.795105  
C8 4.706691 -2.491747 -1.659815  
C9 3.837182 -3.393254 -2.289938  
C10 2.478161 -3.322368 -2.023469  
H11 1.799307 -3.987365 -2.548629  
H12 4.216518 -4.126814 -2.994395  
H13 5.773746 -2.533640 -1.860677  
H14 4.885489 -0.818679 -0.323042  
S15 2.289303 -0.141489 0.582522  
C16 -0.254650 -3.238876 -1.062303  
C17 -1.705013 -3.110250 -0.891747  
C18 -2.444101 -1.894002 -0.992605  
C19 -3.819527 -1.911925 -0.739902  
C20 -4.477635 -3.096482 -0.407579  
C21 -3.773618 -4.298952 -0.348409  
C22 -2.407501 -4.295199 -0.599930  
H23 -1.845957 -5.224207 -0.542829  
H24 -4.282287 -5.226270 -0.106074  
H25 -5.545433 -3.073791 -0.211740  
H26 -4.400471 -1.001178 -0.810469  
S27 -1.614791 -0.379366 -1.515239  
C28 -2.813698 0.922732 -1.067616  
H29 -2.272148 1.861265 -1.205480  
H30 -3.690676 0.919105 -1.718246  
H31 -3.100159 0.825174 -0.017939  
H32 0.098969 -4.229610 -1.361774

3<sup>2</sup>

Mn 0.070054014 -0.456076579 0.140849883  
C -0.296538606 1.053400254 1.064813320  
O -0.585126749 2.027301997 1.638639762  
N 0.482411247 -2.268661345 -0.698938143  
C 1.862094105 -2.550461547 -0.954236142  
C 2.815040230 -1.736017335 -0.306887436  
C 4.175711869 -2.032327732 -0.489360600  
C 4.577801052 -3.066255768 -1.329910330  
C 3.627833725 -3.825210541 -2.023135256  
C 2.274233807 -3.562538160 -1.836864442  
H 1.538583591 -4.115481302 -2.413149555  
H 3.939003848 -4.598583985 -2.718500002  
H 5.637341033 -3.263847707 -1.468688765  
H 4.913920572 -1.422642196 0.022640374  
S 2.282246184 -0.368698921 0.672203003  
C -0.339767466 -3.280041617 -0.791186017  
C -1.796248376 -3.310736370 -0.775429667  
C -2.687474011 -2.207459663 -0.803196307

C -4.067474998 -2.426252641 -0.868171498  
C -4.592932443 -3.717149215 -0.859468443  
C -3.733489381 -4.816098609 -0.818547462  
C -2.362831470 -4.606085044 -0.792998178  
H -1.692062741 -5.460977251 -0.779034301  
H -4.129189711 -5.826820314 -0.815355436  
H -5.669027396 -3.858841293 -0.889548553  
H -4.747511936 -1.584040316 -0.920744264  
S -2.052574169 -0.531894050 -0.826852677  
C -3.327173367 0.380039788 0.124405335  
H -2.867524116 1.332315568 0.389841895  
H -4.213105004 0.556253951 -0.487099709  
H -3.580828411 -0.172004452 1.030603632  
H 0.100900403 -4.269663531 -0.915055692

1<sup>2</sup>

Mn 0.085546701 -0.329479090 0.033956827  
C -0.677462913 -0.804581900 1.547009401  
O -1.159740913 -1.137214797 2.556514660  
N 0.508308852 -2.162205929 -0.617750073  
C 1.881532003 -2.393090336 -0.908189547  
C 2.812674484 -1.421350292 -0.464640891  
C 4.175849831 -1.633777669 -0.743220957  
C 4.600638497 -2.749578308 -1.452796834  
C 3.669490649 -3.684198773 -1.927089344  
C 2.319398131 -3.497429488 -1.663301727  
H 1.595815368 -4.187986252 -2.084724927  
H 3.993886558 -4.535035843 -2.518084447  
H 5.659074878 -2.884746115 -1.658252904  
H 4.894935488 -0.899613276 -0.393464176  
S 2.280488299 0.009878331 0.419320191  
C -0.326958704 -3.161973787 -0.635408979  
C -1.783817860 -3.109629671 -0.608645071  
C -2.600166800 -1.975786653 -0.866046126  
C -3.988664101 -2.116873863 -0.914392279  
C -4.597653255 -3.344637422 -0.652878167  
C -3.813251005 -4.466369635 -0.383431324  
C -2.430425555 -4.344590440 -0.386319413  
H -1.814902552 -5.220718164 -0.199651302  
H -4.274692607 -5.428163774 -0.183693099  
H -5.680875209 -3.418832776 -0.664400952  
H -4.612947529 -1.261246510 -1.144741326  
S -1.842803063 -0.377129748 -1.209774364  
C -3.066521777 0.779423815 -0.485126632  
H -2.558571106 1.745382455 -0.442494487  
H -3.955724103 0.872335779 -1.110916092  
H -3.323925032 0.451561465 0.523283852  
H 0.078384547 -4.173145163 -0.688318335

3

Mn1 -0.698809 -0.305275 0.595453  
C2 -2.686290 -0.548225 0.948889  
O3 -3.801989 -0.707985 1.215550  
N4 0.695295 -1.919450 0.156151  
C5 1.883587 -1.685317 0.899285  
C6 2.248721 -0.336150 1.156308  
C7 3.416101 -0.113116 1.908909

C8 4.186845 -1.167575 2.394468  
C9 3.800070 -2.491650 2.159556  
C10 2.650566 -2.741929 1.414642  
H11 2.318626 -3.764183 1.254592  
H12 4.378050 -3.317548 2.563132  
H13 5.081212 -0.955527 2.974235  
H14 3.708139 0.913292 2.109231  
S15 1.293625 1.039452 0.555337  
C16 0.680400 -2.881323 -0.721146  
C17 -0.476148 -3.261468 -1.521098  
C18 -1.455860 -2.373447 -2.041423  
C19 -2.575064 -2.894348 -2.705960  
C20 -2.734306 -4.266161 -2.883969  
C21 -1.741002 -5.145211 -2.437908  
C22 -0.626453 -4.640335 -1.782564  
H23 0.140672 -5.320742 -1.420102  
H24 -1.838095 -6.214227 -2.601175  
H25 -3.610957 -4.644478 -3.401252  
H26 -3.310775 -2.206191 -3.110443  
S27 -1.300952 -0.581377 -2.029078  
C28 0.322011 -0.317457 -2.841697  
H29 0.388807 0.756671 -3.023798  
H30 1.132547 -0.607903 -2.174060  
H31 0.356909 -0.863308 -3.786310  
H32 1.577577 -3.492020 -0.862652  
H33 -0.630294 0.238156 4.480876  
O34 -0.518452 -0.978944 2.795174  
C35 -0.627822 -2.368218 3.192982  
C36 0.064344 -2.474696 4.561171  
C37 0.982335 -1.239666 4.578621  
C38 0.136016 -0.212809 3.834399  
H39 -1.687982 -2.641326 3.221969  
H40 -0.129997 -2.964061 2.423072  
H41 0.610394 -3.415880 4.669796  
H42 -0.672140 -2.415265 5.370266  
H43 1.902243 -1.433624 4.020173  
H44 1.245093 -0.914822 5.589349  
H45 0.703324 0.575104 3.335469

33

Mn -0.809991432 -0.587127150 0.661844291  
C -2.356935233 -1.487816331 0.909335973  
O -3.355438021 -2.069964203 1.096104465  
N 0.702935693 -2.051421188 0.149578698  
C 1.890447468 -1.808215844 0.884636079  
C 2.203591615 -0.446599665 1.145692596  
C 3.382540748 -0.187842254 1.869360244  
C 4.192279962 -1.222554739 2.333898985  
C 3.850486305 -2.559108064 2.095127465  
C 2.700413854 -2.845968653 1.362487624  
H 2.402658070 -3.876064845 1.183829417  
H 4.466683103 -3.365044488 2.481732316  
H 5.088832802 -0.985921476 2.901038293  
H 3.646762090 0.845930345 2.071684136  
S 1.149433871 0.847580990 0.565413594  
C 0.692613813 -2.924442355 -0.801218267  
C -0.483728321 -3.198918123 -1.629799293  
C -1.449926496 -2.233383721 -2.012817130

C -2.574178206 -2.627270968 -2.744416928  
C -2.752227274 -3.958174688 -3.120389009  
C -1.780832570 -4.906805290 -2.797092941  
C -0.656617310 -4.521609692 -2.075070492  
H 0.095809995 -5.261102668 -1.811707522  
H -1.899968072 -5.941421261 -3.104228683  
H -3.635351156 -4.245683557 -3.683021604  
H -3.306190168 -1.878186472 -3.028965462  
S -1.288056492 -0.466035892 -1.673355692  
C 0.226385313 -0.075748180 -2.631504215  
H 0.400289952 0.993378020 -2.508301504  
H 1.079842959 -0.612361898 -2.219949057  
H 0.056772364 -0.324921974 -3.681021361  
H 1.591940143 -3.510615554 -1.021884957  
H -0.703213874 0.693237217 4.246528000  
O -0.458125637 -0.750788438 2.771635930  
C -0.557583894 -2.069931243 3.374261512  
C 0.040953242 -1.934995028 4.781160362  
C 0.938240952 -0.692168567 4.652347572  
C 0.116571733 0.186932021 3.717930516  
H -1.607314424 -2.375268030 3.368354587  
H 0.015618648 -2.754467500 2.743094148  
H 0.589510476 -2.833232136 5.077336085  
H -0.748798222 -1.760033914 5.520151307  
H 1.889335306 -0.947106137 4.174846284  
H 1.142916470 -0.208773715 5.611867697  
H 0.686835591 0.911650578 3.137975376

13

Mn -0.739963744 -0.610489471 0.644402062  
C -2.169355243 -1.669145136 0.900081955  
O -3.100597883 -2.343013211 1.104997629  
N 0.592142399 -1.955341477 0.173481945  
C 1.799617408 -1.744597933 0.909294900  
C 2.172403011 -0.393138712 1.127305315  
C 3.367735869 -0.162704387 1.833001778  
C 4.134140538 -1.218332977 2.323252772  
C 3.728808899 -2.544616770 2.131964410  
C 2.560460576 -2.802930754 1.416546826  
H 2.214170958 -3.823588780 1.277363951  
H 4.309925561 -3.365067017 2.541414478  
H 5.046273100 -1.005450112 2.874765336  
H 3.677777170 0.864265169 2.001755054  
S 1.143435987 0.906078387 0.526823306  
C 0.571974130 -2.877529832 -0.743334819  
C -0.566573739 -3.150715275 -1.617978897  
C -1.492962571 -2.169245412 -2.052011264  
C -2.559728631 -2.528529998 -2.875872696  
C -2.724391122 -3.850862135 -3.292660111  
C -1.794033596 -4.817889129 -2.910534592  
C -0.722531643 -4.464040331 -2.096133683  
H 0.000290219 -5.218606278 -1.795430053  
H -1.903999536 -5.845638049 -3.243563355  
H -3.566962237 -4.118024488 -3.923489456  
H -3.261401657 -1.763242283 -3.193018503  
S -1.321207537 -0.428734604 -1.605336518  
C 0.140782328 -0.002867016 -2.631860543  
H 0.347917456 1.052523667 -2.455041963



H 1.003168480 -0.583873466 -2.305159314  
H -0.093719921 -0.184936302 -3.682716282  
H 1.460966981 -3.491669341 -0.897170689  
H -0.734107405 0.747248325 4.206418511  
O -0.399740814 -0.720635255 2.769659697  
C -0.474618101 -2.014633212 3.425211042  
C 0.129141437 -1.819995585 4.824561605  
C 0.969139238 -0.541486271 4.661685478  
C 0.114070370 0.268560118 3.695333229  
H -1.519380091 -2.337329035 3.442548032  
H 0.102225772 -2.713602920 2.814636707  
H 0.720662588 -2.685200557 5.135884332  
H -0.661441433 -1.665260310 5.567257634  
H 1.932988176 -0.767819879 4.195803827  
H 1.146247272 -0.019892430 5.606616878  
H 0.653005071 1.006456683 3.101943803

4"

Mn1 1.626446 1.096149 -0.003494  
N2 0.790107 0.543544 -1.807433  
C3 0.501123 1.672248 -2.609018  
C4 0.240737 2.926164 -1.985018  
C5 -0.029036 4.034375 -2.802277  
C6 -0.043123 3.934340 -4.193480  
C7 0.228109 2.707788 -4.801302  
C8 0.498580 1.591793 -4.012559  
H9 0.741684 0.642152 -4.480870  
H10 0.238700 2.618488 -5.884298  
H11 -0.261672 4.811499 -4.796790  
H12 -0.249552 4.985365 -2.324881  
S13 0.249654 3.105211 -0.208766  
C14 0.292307 -0.641707 -2.201807  
C15 0.484115 -1.913864 -1.585853  
C16 1.456467 -2.292084 -0.595375  
C17 1.415904 -3.563142 -0.005175  
C18 0.458960 -4.506285 -0.364096  
C19 -0.460459 -4.184401 -1.379612  
C20 -0.436478 -2.938437 -1.969675  
H21 -1.167935 -2.697767 -2.737791  
H22 -1.198407 -4.915493 -1.699471  
H23 0.442800 -5.481119 0.113101  
H24 2.169726 -3.813449 0.736365  
S25 2.837333 -1.258059 -0.103202  
C26 3.722719 -1.026257 -1.693988  
H27 4.585656 -0.392843 -1.481224  
H28 4.042935 -1.997006 -2.076629  
H29 3.064421 -0.520584 -2.400641  
H30 -0.444623 -0.625097 -3.006607  
N31 3.594639 2.110223 -0.550741  
C32 3.843399 3.187425 -0.916791  
C33 4.034168 4.528116 -1.359191  
C34 2.914051 5.380151 -1.360323  
C35 5.294537 4.979496 -1.785535  
C36 3.071682 6.691481 -1.796890  
C37 5.429783 6.294986 -2.216738  
C38 4.321829 7.148547 -2.222813  
H39 1.956820 4.996069 -1.018617  
H40 6.144211 4.304879 -1.778107

H41 2.214004 7.357004 -1.806054  
H42 6.398361 6.655577 -2.549000  
H43 4.434869 8.173918 -2.562978  
C44 -0.126356 0.040549 1.155312  
O45 -1.158843 -0.346200 1.430704  
C46 2.617455 0.054030 3.270884  
C47 1.444162 0.005028 4.023504  
C48 2.951941 1.223728 2.576655  
H49 1.179183 -0.902521 4.558810  
H50 3.867578 1.277228 1.995711  
C51 0.600925 1.120935 4.082469  
C52 2.105366 2.337636 2.632111  
H53 -0.317637 1.074711 4.660781  
H54 2.354326 3.237034 2.078561  
C55 0.925627 2.283357 3.383511  
H56 0.260862 3.141136 3.406055  
H57 3.265934 -0.814590 3.209590

4-TS"

Mn -1.865365146 -2.946136580 -0.007813434  
C -3.918122067 -3.400660930 -0.208476781  
O -5.005527086 -3.657919388 -0.446624211  
N -0.784077185 -2.364233241 -1.640685549  
C 0.353482305 -3.151663163 -1.908481352  
C 1.477938818 -3.103744900 -1.035494880  
C 2.577825285 -3.927729657 -1.300090702  
C 2.616760849 -4.771747358 -2.409370632  
C 1.542330103 -4.775855665 -3.296797854  
C 0.434305688 -3.972004841 -3.051759155  
H -0.376537625 -3.962554045 -3.771572256  
H 1.564538426 -5.398321259 -4.187539732  
H 3.483005226 -5.403070405 -2.583463876  
H 3.415918906 -3.896618745 -0.611633534  
S 1.621532212 -1.986952012 0.366954987  
C -1.962638866 -2.618943480 -2.257982049  
C -2.925333299 -1.559432702 -2.634128001  
C -3.281957327 -0.439106818 -1.842239853  
C -4.202970492 0.498362789 -2.320374084  
C -4.796598689 0.349043942 -3.574016209  
C -4.475768207 -0.762121923 -4.353977149  
C -3.558097545 -1.698074459 -3.884115129  
H -3.304848509 -2.555747996 -4.502360197  
H -4.936569950 -0.900394252 -5.327911656  
H -5.511184644 1.086175291 -3.927890238  
H -4.468024355 1.340746122 -1.688446600  
S -2.724917857 -0.262956938 -0.141815639  
C -1.083504151 0.538742064 -0.328222663  
H -0.707635141 0.705864777 0.683111625  
H -0.414447373 -0.137932186 -0.857751710  
H -1.205817281 1.492928847 -0.844236678  
H -2.091177999 -3.548099248 -2.820645057  
C -0.005532555 -2.035507765 3.873832962  
C -1.311528620 -2.470770698 3.124732598  
O -0.840812822 -2.423682771 1.741500433  
C -1.742861318 -3.905258512 3.449347776  
C -2.495952035 -1.520397952 3.257662053  
O 1.039670995 -2.627268040 3.078692805  
C 0.099462319 -2.565659060 5.301365929

C 0.203913537 -0.514973078 3.846463253  
B 0.580693898 -2.794321879 1.755801340  
H 0.564263071 -4.103932205 1.397370875  
H -0.900286540 -4.597340389 3.398216974  
H -2.185301637 -3.962433419 4.447845971  
H -2.486909986 -4.232192665 2.717230394  
H 1.028956712 -2.212090424 5.756261653  
H -0.737969567 -2.210325189 5.911921807  
H 0.109905566 -3.657013132 5.318429531  
H -3.338758217 -1.894364798 2.666808773  
H -2.815259149 -1.452418577 4.302617897  
H -2.253901840 -0.519767053 2.897330730  
H 0.102419356 -0.133915972 2.826290736  
H -0.505225658 0.009813738 4.494490028  
H 1.218554064 -0.296913519 4.188976663  
C 2.595399804 -8.414596948 1.210352876  
C 1.515999840 -8.513749386 0.326360339  
C 2.793768997 -7.244919875 1.947120297  
H 3.281902766 -9.249447957 1.321227393  
H 1.365339198 -9.421613111 -0.251186850  
C 0.633948794 -7.448594794 0.182059995  
H 3.633357447 -7.168646177 2.631731858  
C 1.918627832 -6.169447294 1.802954252  
H -0.209502661 -7.499603731 -0.498866289  
C 0.834980305 -6.273639893 0.924668489  
H 2.063668535 -5.249322945 2.362081485  
C -0.112934389 -5.174379104 0.746450279  
N -1.184423363 -4.937142918 0.247100150

=====  
4-TS"  
=====

Mn1 1.716427 0.850060 0.214219  
N2 0.625647 0.446990 -1.517467  
C3 0.252970 1.642056 -2.163962  
C4 -0.079280 2.788475 -1.397916  
C5 -0.365916 4.000487 -2.033714  
C6 -0.341840 4.092630 -3.426074  
C7 -0.034089 2.965314 -4.189394  
C8 0.259947 1.755869 -3.566222  
H9 0.542074 0.889631 -4.157148  
H10 -0.008101 3.028710 -5.274009  
H11 -0.564463 5.040253 -3.908051  
H12 -0.606313 4.866801 -1.426484  
S13 -0.135886 2.659116 0.393338  
B14 0.889473 4.272326 0.963933  
O15 0.298301 5.528044 0.654013  
C16 0.424882 6.358601 1.830220  
C17 0.456884 5.293153 2.982551  
O18 1.163973 4.201459 2.355840  
C19 -0.947226 4.797009 3.360740  
H20 -1.510996 4.505874 2.470743  
H21 -0.854677 3.917135 4.004850  
H22 -1.513419 5.559863 3.904440  
C23 1.226111 5.709419 4.233353  
H24 1.187767 4.905362 4.975150  
H25 2.275373 5.906748 4.006267  
H26 0.785949 6.606453 4.682278  
C27 1.741809 7.141853 1.726847  
H28 1.862840 7.841477 2.559712

H29 2.599189 6.463695 1.710178  
H30 1.745142 7.713550 0.794500  
C31 -0.759784 7.319572 1.871677  
H32 -1.706511 6.783292 1.787401  
H33 -0.760616 7.895947 2.803450  
H34 -0.694035 8.022727 1.035848  
C35 0.194656 -0.709546 -2.052115  
C36 0.562455 -2.030007 -1.659339  
C37 1.696531 -2.436312 -0.876239  
C38 1.846011 -3.773013 -0.481452  
C39 0.925558 -4.749483 -0.848019  
C40 -0.153779 -4.388641 -1.675227  
C41 -0.316843 -3.077522 -2.071364  
H42 -1.167899 -2.808395 -2.692743  
H43 -0.867283 -5.141061 -2.000919  
H44 1.058434 -5.777190 -0.524381  
H45 2.718360 -4.045653 0.106301  
S46 3.042289 -1.339974 -0.424913  
C47 3.663257 -0.771361 -2.055552  
H48 4.413946 -0.007409 -1.843727  
H49 4.100895 -1.610899 -2.598870  
H50 2.844975 -0.320832 -2.616565  
H51 -0.605459 -0.645864 -2.791886  
H52 1.963150 4.048265 0.237716  
N53 3.200131 2.209650 -0.298330  
C54 3.160940 3.401098 -0.411991  
C55 3.866269 4.552039 -0.957858  
C56 3.222313 5.776283 -1.172771  
C57 5.221583 4.389944 -1.294180  
C58 3.940362 6.837678 -1.721315  
C59 5.929120 5.459100 -1.832297  
C60 5.289523 6.684069 -2.046232  
H61 2.175817 5.883214 -0.907727  
H62 5.696428 3.428762 -1.123841  
H63 3.444630 7.788720 -1.892163  
H64 6.978662 5.338610 -2.085188  
H65 5.845455 7.517414 -2.466506  
C66 0.275981 -0.508050 1.440332  
O67 -0.647394 -1.089228 1.756683  
C68 2.656046 1.535559 2.892523  
C69 3.446447 0.422648 2.583465  
C70 3.161764 -0.821687 3.159806  
H71 4.273260 0.526934 1.886923  
H72 2.861657 2.505108 2.454088  
C73 1.581671 1.404863 3.781293  
H74 3.764102 -1.687980 2.902391  
C75 2.095707 -0.946072 4.051284  
H76 0.967747 2.275535 3.981455  
C77 1.306902 0.168151 4.363641  
H78 1.870255 -1.911300 4.496621  
H79 0.470322 0.062563 5.049081

=====  
4-TS'  
=====

Mn1 0.678655 1.104300 0.432616  
N2 -0.305527 0.484752 -1.308233  
C3 -0.324049 1.593743 -2.183670  
C4 -0.670525 2.869063 -1.667955  
C5 -0.677916 3.989239 -2.504179

C6 -0.335292 3.871372 -3.851944  
C7 0.027794 2.625173 -4.366657  
C8 0.034589 1.503498 -3.542036  
H9 0.358806 0.545094 -3.935429  
H10 0.319675 2.525724 -5.408740  
H11 -0.342863 4.750646 -4.489652  
H12 -0.949268 4.953815 -2.087397  
S13 -1.022571 3.046164 0.090226  
B14 0.083263 4.626716 0.529101  
O15 -0.419300 5.885897 0.115791  
C16 -0.128489 6.828469 1.169755  
C17 -0.106359 5.906453 2.441887  
O18 0.417880 4.669951 1.911942  
C19 -1.510865 5.615440 2.989640  
H20 -2.174491 5.275044 2.190092  
H21 -1.441489 4.818207 3.736656  
H22 -1.954230 6.494442 3.467921  
C23 0.809964 6.389486 3.564019  
H24 0.753413 5.703630 4.414750  
H25 1.850241 6.434931 3.236095  
H26 0.508029 7.383062 3.912462  
C27 1.240326 7.465728 0.888170  
H28 1.484041 8.241885 1.620362  
H29 2.033711 6.713873 0.895207  
H30 1.221721 7.924110 -0.104362  
C31 -1.216155 7.899019 1.174098  
H32 -2.210495 7.451255 1.215781  
H33 -1.094331 8.573841 2.028814  
H34 -1.151733 8.493750 0.258061  
C35 -0.704284 -0.696520 -1.808228  
C36 -0.812061 -1.960442 -1.148464  
C37 -0.767738 -2.257310 0.254134  
C38 -0.883584 -3.580973 0.700976  
C39 -1.022575 -4.647666 -0.181560  
C40 -1.099483 -4.382693 -1.558939  
C41 -1.010607 -3.083295 -2.012657  
H42 -1.064111 -2.888257 -3.081123  
H43 -1.229395 -5.195216 -2.268422  
H44 -1.093408 -5.662560 0.197556  
H45 -0.878317 -3.784819 1.767218  
S46 -0.707601 -0.965728 1.510279  
C47 0.455877 -1.697434 2.731465  
H48 -0.064671 -2.361358 3.423390  
H49 1.237722 -2.248104 2.204253  
H50 0.901636 -0.861774 3.271140  
H51 -1.005887 -0.716976 -2.855534  
H52 1.158454 4.270760 -0.188199  
C53 1.233765 2.579827 4.601724  
C54 2.511084 2.918419 3.814397  
C55 2.647521 1.700547 2.908192  
H56 3.387406 3.067231 4.451837  
H57 2.342333 3.808678 3.203221  
C58 0.350591 1.937481 3.529865  
H59 1.453407 1.867525 5.406003  
H60 0.756259 3.457637 5.044321  
O61 1.278878 1.341821 2.570569  
H62 -0.299858 1.141515 3.906085  
H63 -0.236041 2.683295 2.992314  
H64 3.109152 0.847320 3.424355

H65 3.170405 1.891203 1.970017  
N66 2.280973 2.336774 -0.242200  
C67 2.297759 3.493029 -0.572980  
C68 3.114080 4.458374 -1.308076  
C69 2.574129 5.660082 -1.779859  
C70 4.455744 4.134790 -1.572036  
C71 3.375602 6.536463 -2.509669  
C72 5.250008 5.019025 -2.294766  
C73 4.711384 6.221096 -2.765108  
H74 1.535688 5.891748 -1.572234  
H75 4.850351 3.191451 -1.207525  
H76 2.955630 7.467387 -2.879724  
H77 6.288695 4.771295 -2.495589  
H78 5.333751 6.908383 -3.331555  
C79 2.248223 -0.716466 0.001237  
O80 2.663570 -1.544037 -0.671763

=====  
4-TS  
=====

Mn1 1.385144 0.869650 0.393029  
N2 0.472577 0.428750 -1.447391  
C3 0.166555 1.603012 -2.156762  
C4 -0.240208 2.771118 -1.462384  
C5 -0.464850 3.965471 -2.152949  
C6 -0.306289 4.023343 -3.538056  
C7 0.073540 2.875348 -4.236093  
C8 0.306454 1.683789 -3.556034  
H9 0.644946 0.803936 -4.095051  
H10 0.204526 2.909693 -5.314582  
H11 -0.480792 4.957358 -4.064360  
H12 -0.764403 4.845815 -1.593434  
S13 -0.464935 2.703089 0.319385  
B14 0.577125 4.282956 0.909950  
O15 0.018292 5.550100 0.596619  
C16 0.214948 6.396498 1.749104  
C17 0.230441 5.353366 2.922832  
O18 0.862669 4.211955 2.303051  
C19 -1.181265 4.928923 3.353497  
H20 -1.781680 4.643956 2.485408  
H21 -1.103978 4.059787 4.014479  
H22 -1.699632 5.726248 3.895410  
C23 1.052986 5.770015 4.139259  
H24 0.991654 4.999123 4.913430  
H25 2.104666 5.905174 3.879894  
H26 0.672292 6.704974 4.564374  
C27 1.561567 7.119025 1.595189  
H28 1.734022 7.831548 2.407791  
H29 2.389206 6.405191 1.571567  
H30 1.565337 7.668168 0.649729  
C31 -0.924180 7.410693 1.803722  
H32 -1.895892 6.916423 1.753837  
H33 -0.874237 8.003570 2.723812  
H34 -0.849369 8.094912 0.953103  
C35 0.085974 -0.743766 -1.996098  
C36 0.390336 -2.061264 -1.550497  
C37 1.403814 -2.480174 -0.617496  
C38 1.480315 -3.816798 -0.202479  
C39 0.606763 -4.786198 -0.685582  
C40 -0.346319 -4.416712 -1.653915

C41 -0.437505 -3.106299 -2.072447  
H42 -1.193814 -2.831351 -2.804198  
H43 -1.018529 -5.161839 -2.071028  
H44 0.682213 -5.812821 -0.341188  
H45 2.260080 -4.095184 0.501394  
S46 2.684723 -1.398502 0.019375  
C47 3.546626 -0.865886 -1.512909  
H48 4.259056 -0.095181 -1.212954  
H49 4.055371 -1.718624 -1.966296  
H50 2.820035 -0.428714 -2.197692  
H51 -0.636664 -0.687665 -2.812464  
H52 1.659556 4.036493 0.189023  
C53 1.714114 1.856310 4.719619  
C54 3.000160 2.319064 4.013907  
C55 3.214008 1.197668 3.003687  
H56 3.847394 2.440375 4.694864  
H57 2.812458 3.256659 3.484019  
C58 0.900864 1.250512 3.570160  
H59 1.941099 1.098180 5.477920  
H60 1.174837 2.673833 5.204642  
O61 1.875934 0.856159 2.559234  
H62 0.329900 0.362693 3.859423  
H63 0.242704 1.990321 3.111476  
H64 3.669351 0.307801 3.459168  
H65 3.781382 1.488108 2.117756  
N66 2.945956 2.200983 -0.116439  
C67 2.871991 3.380527 -0.325109  
C68 3.578484 4.493497 -0.951463  
C69 2.921065 5.681199 -1.293084  
C70 4.943146 4.327191 -1.243310  
C71 3.633051 6.700907 -1.922990  
C72 5.645563 5.354669 -1.863428  
C73 4.991456 6.542848 -2.204403  
H74 1.867206 5.793131 -1.062170  
H75 5.428360 3.393284 -0.977607  
H76 3.125057 7.622020 -2.193640  
H77 6.702008 5.230006 -2.083720  
H78 5.542557 7.343163 -2.690391  
C79 -0.493040 -0.588633 1.266786  
O80 -1.494624 -1.120376 1.317681

=====  
<sup>3</sup>4-TS  
=====

Mn -1.178217636 -1.030557521 -1.158373220  
C -1.632711728 -2.768484144 -0.190650377  
O -1.876656986 -3.703539504 0.426430611  
N 0.713007402 -0.976447470 -0.661094771  
C 1.181231126 0.143283844 0.059869800  
C 0.252860566 0.978864131 0.718993984  
C 0.682020279 2.073952788 1.469147362  
C 2.041781601 2.377494807 1.560343159  
C 2.967287787 1.587311931 0.874592730  
C 2.545377949 0.489962645 0.127180494  
H 3.270286019 -0.085429111 -0.438002442  
H 4.025293834 1.831584412 0.909213230  
H 2.370131505 3.233165882 2.142641461  
H -0.060211372 2.697633124 1.956773920  
S -1.488043246 0.640341933 0.534787583  
C 1.592870911 -1.988480261 -0.870207010

C 1.492658571 -3.055506994 -1.808684352  
C 0.596499775 -3.138889892 -2.920996944  
C 0.597378481 -4.248566758 -3.767127447  
C 1.476713022 -5.311772732 -3.560952030  
C 2.389273510 -5.240787143 -2.497539815  
C 2.399486863 -4.144602518 -1.654574231  
H 3.107590662 -4.107755595 -0.830247959  
H 3.092573770 -6.051892097 -2.329207289  
H 1.458227874 -6.172988233 -4.221228350  
H -0.098967094 -4.271443771 -4.600641547  
S -0.543374099 -1.817301347 -3.320558086  
C 0.591973334 -0.489821463 -3.885693165  
H -0.015952494 0.414254793 -3.925856095  
H 1.383310288 -0.356725425 -3.148087655  
H 1.001517256 -0.740785006 -4.866198889  
H 2.442565053 -2.040204633 -0.191962880  
C -1.431103094 4.126734499 -1.599487234  
C -0.599369920 3.094524458 -2.460916055  
O -1.205609573 1.830530724 -2.110098570  
C -0.734035563 3.294208422 -3.972626382  
C 0.884914926 3.036155357 -2.081355961  
O -1.877755746 3.335626408 -0.476639757  
C -2.682315429 4.640267206 -2.328968248  
C -0.619369451 5.301223317 -1.059285648  
B -1.937159173 2.003544076 -0.903213584  
H -3.152670519 1.502004610 -1.065642085  
H -1.761414817 3.138040273 -4.306306442  
H -0.418235242 4.302451502 -4.261595796  
H -0.093874286 2.583118201 -4.503397862  
H -3.308447656 5.179556447 -1.612155387  
H -2.428494496 5.320722840 -3.147461899  
H -3.269842154 3.813601779 -2.736337550  
H 1.340368409 2.170799933 -2.570297473  
H 1.416442594 3.935937560 -2.407722847  
H 1.019837297 2.917770217 -1.007170172  
H 0.185004451 4.954549397 -0.408293785  
H -0.185641307 5.885625851 -1.877933876  
H -1.269998732 5.959240801 -0.475785836  
C -6.761028070 0.608719005 -3.964980105  
C -7.249623795 1.863685861 -3.587620574  
C -6.581829580 2.614311991 -2.617803337  
H -8.149894791 2.255614655 -4.052298239  
H -7.279465287 0.025917050 -4.720805092  
C -5.606618942 0.103508957 -3.376808172  
H -5.208755627 -0.866621392 -3.656438939  
C -4.933730983 0.862954149 -2.402779037  
H -6.961650100 3.588564059 -2.325458830  
C -5.423127681 2.118235939 -2.023389322  
H -4.886923731 2.692030021 -1.274351279  
C -3.723674108 0.299889928 -1.824302338  
N -3.044218253 -0.685324371 -1.774057672

=====  
<sup>1</sup>4-TS  
=====

Mn -1.175227139 -0.832263899 -1.394599926  
C -1.609689511 -2.420784518 -0.744159670  
O -1.940749756 -3.443759056 -0.298020591  
N 0.718428332 -0.875155243 -0.722415265  
C 1.128698460 0.189799096 0.134038201

C 0.150921271 0.875613720 0.878560300  
C 0.519564900 1.928692332 1.719923286  
C 1.854254114 2.319856916 1.818187743  
C 2.825548301 1.663038578 1.058528062  
C 2.465543556 0.611113217 0.220857634  
H 3.215403693 0.143330044 -0.409060890  
H 3.862140443 1.984617896 1.100254680  
H 2.130550535 3.146758366 2.465789838  
H -0.252750337 2.452646003 2.273642177  
S -1.579605248 0.466037995 0.636226813  
C 1.572417838 -1.858452781 -0.869182219  
C 1.443564015 -3.006033059 -1.753264786  
C 0.577559111 -3.111607978 -2.871734727  
C 0.521735232 -4.291592277 -3.610837808  
C 1.318283449 -5.387897181 -3.271907707  
C 2.206701197 -5.287578982 -2.200938387  
C 2.272379565 -4.110223922 -1.464807341  
H 2.959655789 -4.039423141 -0.625263892  
H 2.842733598 -6.126599748 -1.935131851  
H 1.248028246 -6.306678061 -3.846182402  
H -0.156405418 -4.347841536 -4.456930677  
S -0.464885831 -1.750567787 -3.414930302  
C 0.847255601 -0.659350825 -4.094780048  
H 0.334884430 0.175156746 -4.572363945  
H 1.483188410 -0.289417594 -3.288820999  
H 1.435245774 -1.205133608 -4.835725136  
H 2.452655100 -1.882502135 -0.225023749  
C -1.487253071 3.852083158 -1.657041404  
C -0.570642340 2.786635553 -2.388295818  
O -1.074765550 1.525173065 -1.857629272  
C -0.722803123 2.794818147 -3.907893017  
C 0.904911370 2.885313446 -1.998257434  
O -1.884920899 3.170997832 -0.437799118  
C -2.762724451 4.186617906 -2.440940578  
C -0.763797540 5.137107719 -1.262723768  
B -1.843991547 1.815690669 -0.705614010  
H -3.233970157 1.283221056 -1.040893983  
H -1.719553146 2.468128937 -4.208662172  
H -0.543995319 3.799628002 -4.304850060  
H 0.011368529 2.128244830 -4.364727396  
H -3.432459597 4.758008264 -1.792569221  
H -2.543352186 4.790265731 -3.326410755  
H -3.292475599 3.286067647 -2.755543146  
H 1.431741421 2.007478468 -2.380943628  
H 1.368734265 3.779943382 -2.424960804  
H 1.029330378 2.902960975 -0.914974461  
H 0.055400184 4.936493041 -0.570385172  
H -0.364252932 5.643880616 -2.147679088  
H -1.467376066 5.814562740 -0.770842334  
C -6.847708326 0.877250132 -3.864866169  
C -7.394364336 2.025593469 -3.281298428  
C -6.735181604 2.644568447 -2.217654736  
H -8.328974045 2.434633011 -3.655548032  
H -7.359511334 0.393532674 -4.692674310  
C -5.648695308 0.351847234 -3.393127263  
H -5.206307437 -0.537292693 -3.831292414  
C -4.979257521 0.976064117 -2.327703577  
H -7.156283685 3.535495431 -1.759551167  
C -5.532899653 2.122361274 -1.742298366

H -5.007291363 2.603624315 -0.921346390  
C -3.697480145 0.430079731 -1.851365872  
N -3.020649187 -0.563102076 -2.097200260

=====  
4  
=====

Mn1 1.392584 0.941011 0.369926  
N2 0.866888 0.580164 -1.602221  
C3 0.636687 1.776780 -2.313851  
C4 0.233235 2.948893 -1.609255  
C5 0.003757 4.122433 -2.343460  
C6 0.176752 4.172200 -3.726379  
C7 0.597854 3.030730 -4.410163  
C8 0.823633 1.849751 -3.706531  
H9 1.176109 0.965109 -4.229544  
H10 0.757410 3.057561 -5.484914  
H11 -0.011390 5.099016 -4.262140  
H12 -0.326847 5.007468 -1.806288  
S13 0.013194 2.958593 0.162433  
C14 0.478544 -0.573046 -2.187358  
C15 0.653504 -1.901721 -1.706185  
C16 1.513977 -2.369592 -0.650892  
C17 1.465893 -3.703645 -0.223999  
C18 0.608750 -4.629229 -0.809382  
C19 -0.193867 -4.214816 -1.890087  
C20 -0.160236 -2.906622 -2.322300  
H21 -0.803773 -2.599344 -3.143534  
H22 -0.850217 -4.925815 -2.385347  
H23 0.582994 -5.655209 -0.455894  
H24 2.135067 -4.014923 0.573711  
S25 2.755431 -1.350137 0.138320  
C26 3.812283 -0.875556 -1.286045  
H27 4.624260 -0.264945 -0.887244  
H28 4.206897 -1.776563 -1.759196  
H29 3.222746 -0.286014 -1.989010  
H30 -0.157564 -0.484495 -3.069893  
C31 1.714325 1.985788 4.669840  
C32 3.142687 1.931068 4.099150  
C33 3.046204 0.748335 3.141299  
H34 3.909844 1.793649 4.866131  
H35 3.368449 2.843802 3.536666  
C36 0.850064 1.614313 3.456203  
H37 1.597110 1.245074 5.468672  
H38 1.449299 2.965816 5.075295  
O39 1.725707 0.866886 2.561784  
H40 -0.006111 0.980007 3.707916  
H41 0.495197 2.490206 2.905464  
H42 3.122158 -0.214084 3.664582  
H43 3.763203 0.770820 2.318972  
N44 3.407569 2.071251 0.062552  
C45 3.655089 3.058966 -0.501893  
C46 3.844305 4.303207 -1.168972  
C47 2.820354 5.262228 -1.066317  
C48 5.005655 4.554427 -1.918957  
C49 2.972443 6.478728 -1.724358  
C50 5.139323 5.778122 -2.567549  
C51 4.125748 6.737491 -2.470222  
H52 1.928201 5.024251 -0.494205  
H53 5.779972 3.796864 -1.989471

H54 2.183594 7.222363 -1.661721  
H55 6.030869 5.983832 -3.152244  
H56 4.234695 7.689406 -2.982909  
C57 -0.628104 -0.366728 0.924455  
O58 -1.683690 -0.780094 0.852423

34

Mn 1.291443990 0.940972369 0.422200165  
N 0.697365874 0.735881961 -1.452128505  
C 0.346269286 1.935171797 -2.106326948  
C -0.074830609 3.028358341 -1.303116762  
C -0.488900994 4.210683738 -1.929037967  
C -0.453704068 4.343045557 -3.320520368  
C 0.008740753 3.284844599 -4.108033326  
C 0.405134909 2.090898998 -3.503368981  
H 0.786036667 1.274704893 -4.110178318  
H 0.067619360 3.386750573 -5.188172630  
H -0.770639469 5.274383622 -3.782439868  
H -0.831596435 5.034711506 -1.309358024  
S -0.065745991 2.827757661 0.454899356  
C 0.403032512 -0.425532631 -2.093374333  
C 0.707286104 -1.751464952 -1.686504419  
C 1.658344340 -2.156436807 -0.689642609  
C 1.795514876 -3.496669072 -0.315988206  
C 1.027302325 -4.494174487 -0.910709762  
C 0.131384060 -4.134530714 -1.936224100  
C -0.013585048 -2.815983561 -2.314328582  
H -0.724913486 -2.556655949 -3.095080690  
H -0.459164509 -4.900172572 -2.432688317  
H 1.135609408 -5.529161121 -0.602747941  
H 2.529393886 -3.753580867 0.443330088  
S 2.787370330 -0.986644236 0.050073118  
C 3.777313414 -0.499025808 -1.417650082  
H 4.527641320 0.213140090 -1.074449847  
H 4.252794609 -1.389052806 -1.833429423  
H 3.121618663 -0.024905858 -2.148201345  
H -0.258336234 -0.343130442 -2.954985038  
C 1.527052187 1.480800160 4.770321941  
C 3.003165377 1.182564006 4.456437271  
C 2.919937816 0.520216096 3.079135148  
H 3.483032451 0.536678976 5.196576482  
H 3.572500849 2.116611075 4.396592952  
C 0.998525817 1.900604507 3.402811789  
H 1.017169575 0.574029592 5.115596582  
H 1.392990144 2.259712584 5.525496997  
O 1.725925453 1.067828117 2.462466528  
H -0.065680612 1.714604277 3.245051466  
H 1.211498481 2.949976720 3.172290381  
H 2.795809723 -0.566300870 3.141805548  
H 3.765953357 0.745234445 2.426131347  
N 3.351215740 2.255193782 0.180843188  
C 3.690802252 3.112346338 -0.528330757  
C 4.052206350 4.149220878 -1.441178495  
C 3.107022821 4.567229863 -2.393377887  
C 5.331350406 4.727930610 -1.388322019  
C 3.456212122 5.568623357 -3.294837711  
C 5.662378837 5.727385055 -2.297659902  
C 4.727579515 6.145559874 -3.250256006

H 2.121120166 4.119491738 -2.412987031  
H 6.048024901 4.390171779 -0.646409259  
H 2.727037294 5.893412215 -4.030383715  
H 6.648591187 6.180309064 -2.264348186  
H 4.992239503 6.928218878 -3.955601868  
C -0.495356282 -0.528449475 1.139785138  
O -1.543075038 -0.971929333 1.108553903

14

Mn 1.160592577 0.815644592 0.414641893  
N 0.603329654 0.652814383 -1.511261467  
C 0.271007105 1.888262340 -2.140837232  
C -0.240207177 2.932761801 -1.321230471  
C -0.638253672 4.122933770 -1.972359349  
C -0.482742707 4.294417093 -3.343567586  
C 0.096372567 3.284203133 -4.126114632  
C 0.464240780 2.088207518 -3.518251699  
H 0.942613027 1.309532342 -4.105729754  
H 0.269168089 3.433346474 -5.187533919  
H -0.788170841 5.230856740 -3.804053964  
H -1.058143263 4.920006901 -1.365564401  
S -0.350110605 2.740055487 0.409698870  
C 0.424519065 -0.436430450 -2.208614259  
C 0.754506918 -1.802928939 -1.817302848  
C 1.660042705 -2.196441865 -0.800161887  
C 1.864932866 -3.546566285 -0.517615492  
C 1.187915310 -4.539768578 -1.229150338  
C 0.319242683 -4.173435898 -2.257382463  
C 0.119250201 -2.828352448 -2.548925333  
H -0.562555929 -2.549056579 -3.348435085  
H -0.204561186 -4.933205241 -2.830228272  
H 1.346423435 -5.586140897 -0.986037989  
H 2.564063590 -3.816961354 0.267970138  
S 2.627891651 -0.998719660 0.133619990  
C 3.821185173 -0.532824274 -1.186353327  
H 4.515763779 0.184876941 -0.747241285  
H 4.359151896 -1.418086659 -1.530345379  
H 3.283844358 -0.055117716 -2.006911360  
H -0.082664701 -0.356319387 -3.170906769  
C 1.820770321 1.841301702 4.691300199  
C 3.236660606 2.040653334 4.122685759  
C 3.211563734 1.165615583 2.863562822  
H 4.031591207 1.751628387 4.815943553  
H 3.385462558 3.091765649 3.850024868  
C 0.987010093 1.793275009 3.414568293  
H 1.752899100 0.889544903 5.230764650  
H 1.509463533 2.643889157 5.365310364  
O 1.827146653 1.100030320 2.463510051  
H 0.055947385 1.227244126 3.491346664  
H 0.763468882 2.793587797 3.025234075  
H 3.554125393 0.141927611 3.058609385  
H 3.791232777 1.579786032 2.033858716  
N 2.548710651 2.124696358 -0.152907708  
C 3.192915163 2.966399061 -0.634861008  
C 3.854739257 4.031223843 -1.309915994  
C 3.087693244 4.867989363 -2.143797980  
C 5.236897408 4.238984218 -1.161595194  
C 3.716636654 5.910141617 -2.817893898

C 5.848069166 5.286515223 -1.844186011  
C 5.090613955 6.121969832 -2.670319264  
H 2.021822456 4.691650564 -2.245964496  
H 5.814412668 3.582529094 -0.518672568  
H 3.130572186 6.559593199 -3.460645333  
H 6.915551404 5.451216137 -1.733731938  
H 5.572414299 6.938317482 -3.200474213  
C -0.192229351 -0.227222409 0.995145803  
O -1.087713792 -0.854914826 1.391448642

4-TSa

Mn -1.497526944 0.996972254 1.219288788  
C -3.072224541 2.071270182 -0.348739673  
O -3.749685262 2.777642087 -0.928621884  
N 0.068148679 0.480131732 -0.058463072  
C 1.247020898 1.215115318 0.025447031  
C 1.242549585 2.557896863 0.491222186  
C 2.420338309 3.306117252 0.527752175  
C 3.635713731 2.752878045 0.121056055  
C 3.657345043 1.442166016 -0.356222768  
C 2.487130558 0.693146074 -0.414481294  
H 2.511368852 -0.306605334 -0.835300864  
H 4.588604136 1.000741620 -0.703251594  
H 4.545534710 3.344396756 0.166035283  
H 2.379836959 4.317956914 0.914770999  
S -0.279831778 3.315453589 1.078758694  
C 0.167329268 -0.874005270 -0.185551220  
C -0.693003191 -1.752013565 -0.909340763  
C -1.669875465 -1.419177087 -1.913665313  
C -2.444541879 -2.427378328 -2.500380099  
C -2.293096511 -3.773695019 -2.166869997  
C -1.296976122 -4.127683767 -1.242699852  
C -0.526404249 -3.148310625 -0.645306179  
H 0.233355407 -3.436210556 0.078489832  
H -1.129038704 -5.172009071 -0.991375388  
H -2.908267649 -4.530189109 -2.644591535  
H -3.163755380 -2.139947632 -3.262719045  
S -1.979624579 0.233086293 -2.528112102  
C -0.354633969 0.729108830 -3.212485992  
H -0.410132879 1.803924267 -3.401335803  
H 0.432975276 0.547345209 -2.483645821  
H -0.154805103 0.193687304 -4.143241677  
H 1.000692295 -1.365496383 0.327042240  
C 1.072459591 5.345972847 4.267670087  
C -0.495380268 5.416612822 4.229567626  
O -0.842435727 4.093070127 3.765745659  
C -1.157703960 5.654646022 5.584504839  
C -1.015959844 6.427562314 3.197308837  
O 1.363118164 4.486636756 3.147285957  
C 1.595444010 4.667947760 5.543277591  
C 1.783335226 6.679485691 4.051425433  
B 0.241616324 3.635446106 2.969149865  
H 0.541699642 2.376650349 3.251006885  
H -0.935264809 4.844834366 6.282215697  
H -0.813979471 6.598391442 6.022188181  
H -2.243860831 5.713520772 5.465609687  
H 2.659294086 4.449126581 5.418507588  
H 1.473331020 5.307471997 6.423242048

H 1.080441031 3.720338148 5.721627828  
H -2.093400463 6.281528014 3.070700882  
H -0.845025424 7.460562070 3.516553236  
H -0.535431775 6.272923594 2.227637427  
H 1.546106458 7.099075346 3.072111121  
H 1.501781623 7.402438472 4.825202522  
H 2.866393537 6.531345907 4.101483372  
C 2.649002711 -0.615633694 6.105979047  
C 3.770753519 0.217258815 6.048354484  
C 3.790207561 1.307244511 5.176002611  
H 4.628363534 0.014287073 6.683943635  
H 2.633043820 -1.463518245 6.785219968  
C 1.551158828 -0.362519240 5.289354659  
H 4.663822945 1.950917419 5.128222835  
C 2.689359279 1.580217105 4.365581460  
H 0.675961068 -1.004740352 5.308035415  
C 1.568845095 0.741974629 4.421899838  
H 2.684777659 2.435319442 3.697386002  
C 0.422626306 0.958962575 3.539311655  
N -0.483994976 0.388949603 2.995894182  
H -4.008487842 -0.864946694 -0.488505770  
O -2.875907893 -0.734744063 1.234660048  
C -2.581761948 -1.955490958 1.961840185  
C -3.585953592 -2.973606411 1.428867703  
C -4.813769202 -2.094823117 1.133365626  
C -4.172475870 -0.815038791 0.592330737  
H -1.537786333 -2.203424501 1.768052250  
H -2.709574752 -1.755622166 3.032330009  
H -3.790394489 -3.771376109 2.148637516  
H -3.207439490 -3.421030235 0.505827123  
H -5.371577146 -1.886828644 2.054347606  
H -5.502188408 -2.543934311 0.412443296  
H -4.720411426 0.098890249 0.840621330  
H -4.607115692 3.414482413 2.147547017  
C -3.694591255 3.194630443 2.719335049  
O -3.334076671 1.806094466 2.499129633  
C -3.726945875 1.001394370 3.641008036  
C -4.510204673 1.936999214 4.567933505  
H -4.319167774 0.156792315 3.277523654  
H -2.811083882 0.619294020 4.102782632  
C -3.913423934 3.310322805 4.223886121  
H -4.390701981 1.666100256 5.620815901  
H -5.579937278 1.909363797 4.328928790  
H -2.942353257 3.445076428 4.705261801  
H -4.565817931 4.147162066 4.490524661  
H -2.870325837 3.812896753 2.363029449

4-TSb

Mn -1.390842889 -2.259556072 -1.600034513  
C -2.600148832 -3.421307061 0.321377965  
O -3.094871486 -3.669096350 1.312766100  
N 0.276972996 -3.278988313 -1.005391396  
C 1.461953735 -2.599345820 -0.729176235  
C 1.533266097 -1.648735558 0.328072681  
C 2.742058721 -0.994552988 0.583405296  
C 3.885624673 -1.244099930 -0.175352492  
C 3.825700646 -2.186115342 -1.202120831  
C 2.638065316 -2.858144927 -1.466269165

H 2.610346534 -3.619860758 -2.238778204  
H 4.708982427 -2.408966686 -1.795419625  
H 4.807581024 -0.710554813 0.035818939  
H 2.769562803 -0.265440094 1.387276649  
S 0.119104285 -1.240872612 1.361642538  
C 0.048462968 -3.836928724 -2.233290665  
C -0.726340586 -5.058400003 -2.398418479  
C -1.066685595 -5.954449968 -1.336445155  
C -1.918399131 -7.035390050 -1.612532645  
C -2.386208956 -7.294158144 -2.902263370  
C -1.992369418 -6.469819837 -3.959768398  
C -1.183595728 -5.372684273 -3.698927396  
H -0.887838534 -4.711881357 -4.510894268  
H -2.318216829 -6.679527264 -4.975084505  
H -3.035979751 -8.147193191 -3.075943408  
H -2.214383399 -7.709110998 -0.817778991  
S -0.348572043 -5.707921089 0.287949015  
C -0.761717288 -7.281779288 1.124820987  
H -0.236055011 -7.235590064 2.081661386  
H -1.832686573 -7.381366732 1.324603621  
H -0.403931856 -8.149209462 0.563482482  
H 0.594407871 -3.481813842 -3.113892115  
C -2.459182516 1.646363344 0.132865496  
C -3.164435537 0.294991495 -0.281760394  
O -2.038543475 -0.620125007 -0.370928387  
C -4.088253808 -0.258791166 0.806917000  
C -3.879824373 0.326319405 -1.629902677  
O -1.291415322 1.201937114 0.843956991  
C -3.286633978 2.520067954 1.075067129  
C -2.013537143 2.483174056 -1.078215751  
B -0.869618900 -0.015379378 0.272339400  
H -0.040505750 0.181387889 -0.790120090  
H -3.559191587 -0.327096819 1.760615086  
H -4.977468380 0.365375638 0.935729314  
H -4.415631390 -1.263806808 0.526321710  
H -2.734853426 3.438492972 1.295036469  
H -4.241831461 2.797368620 0.615641543  
H -3.481287044 2.010787058 2.020288680  
H -4.301749047 -0.660623817 -1.841157723  
H -4.691592290 1.060904217 -1.623070251  
H -3.184011989 0.570623552 -2.434282669  
H -1.455510612 1.888409211 -1.802850112  
H -2.868912009 2.934884711 -1.590307630  
H -1.358913133 3.284312587 -0.724591246  
C 3.211362188 1.634212304 -3.777943516  
C 3.597050173 2.542471936 -2.787350390  
C 2.877768211 2.625151326 -1.593344762  
H 4.460730699 3.182227230 -2.946588109  
H 3.774480062 1.564859703 -4.704552336  
C 2.107108063 0.813022360 -3.577192872  
H 3.179998213 3.329102232 -0.823539646  
C 1.775019473 1.800122895 -1.380814987  
H 1.789814215 0.097463658 -4.328998912  
C 1.386233282 0.896985193 -2.375170432  
H 1.210936262 1.844502827 -0.454035042  
C 0.233546746 0.013667539 -2.199177442  
N -0.471134658 -0.747322031 -2.816253707  
H -2.448428320 -2.862863158 -4.698918019  
O -3.166167311 -2.751890341 -2.750739753

C -4.096791429 -3.848488957 -2.502596054  
C -4.803269410 -4.098861314 -3.839978094  
C -4.629804847 -2.761900806 -4.583445701  
C -3.233387505 -2.340042247 -4.140540274  
H -3.530198593 -4.711351938 -2.147898079  
H -4.783514711 -3.510257727 -1.718729065  
H -5.849854043 -4.384261210 -3.703827390  
H -4.293293857 -4.903341223 -4.377549398  
H -5.370984129 -2.028366012 -4.246115644  
H -4.711850861 -2.861106015 -5.669226266  
H -3.034210674 -1.267686614 -4.163952555

5-TS

Mn1 0.993121 1.271788 0.506947  
N2 0.071881 0.700691 -1.305614  
C3 -0.637405 1.750064 -1.902943  
C4 -1.369360 2.682124 -1.125649  
C5 -2.023012 3.760974 -1.723814  
C6 -1.976060 3.943569 -3.104613  
C7 -1.270904 3.027680 -3.889216  
C8 -0.615330 1.952573 -3.300392  
H9 -0.032828 1.268174 -3.909681  
H10 -1.219148 3.158831 -4.967179  
H11 -2.484252 4.788395 -3.559693  
H12 -2.562320 4.460966 -1.095017  
S13 -1.497440 2.448239 0.658691  
B14 -0.623369 3.959993 1.291613  
O15 -0.602311 5.167057 0.644032  
C16 -0.198201 6.170052 1.625605  
C17 -0.572592 5.467295 2.983275  
O18 -0.410254 4.053443 2.654010  
C19 -2.044716 5.654890 3.371119  
H20 -2.705263 5.414226 2.533422  
H21 -2.282319 4.976483 4.195101  
H22 -2.248012 6.680210 3.694329  
C23 0.331888 5.821244 4.158904  
H24 -0.011095 5.308264 5.062107  
H25 1.367485 5.534344 3.974514  
H26 0.297523 6.898763 4.351557  
C27 1.305501 6.426656 1.484998  
H28 1.624645 7.231205 2.154508  
H29 1.884915 5.528739 1.702691  
H30 1.527634 6.725310 0.457572  
C31 -0.976749 7.448243 1.328705  
H32 -2.050475 7.261658 1.274158  
H33 -0.787867 8.202683 2.099910  
H34 -0.654209 7.855899 0.366519  
C35 0.059586 -0.493727 -1.947911  
C36 0.822583 -1.652976 -1.637961  
C37 2.011521 -1.743688 -0.832763  
C38 2.564238 -2.990022 -0.512668  
C39 2.008798 -4.177269 -0.980475  
C40 0.895118 -4.110641 -1.839498  
C41 0.335193 -2.892870 -2.161046  
H42 -0.541305 -2.859710 -2.804470  
H43 0.466863 -5.022399 -2.247972  
H44 2.451022 -5.132212 -0.714562



H45 3.464772 -3.015418 0.095217  
S46 2.939417 -0.312277 -0.284575  
C47 3.340816 0.496960 -1.883297  
H48 4.026369 1.316191 -1.663992  
H49 3.815139 -0.234066 -2.540666  
H50 2.429165 0.892838 -2.330555  
H51 -0.708147 -0.631667 -2.711874  
H52 1.297022 4.708216 -0.876339  
C53 1.309255 2.208162 4.659094  
C54 2.484813 2.749757 3.825812  
C55 2.892877 1.520000 3.028060  
H56 3.296285 3.158945 4.434629  
H57 2.129062 3.508118 3.124231  
C58 0.665965 1.168573 3.722780  
H59 1.673025 1.732382 5.576374  
H60 0.595665 2.987650 4.929536  
O61 1.631814 0.915328 2.662460  
H62 0.441000 0.220690 4.223935  
H63 -0.240218 1.552957 3.249708  
H64 3.477549 0.804250 3.623381  
H65 3.414013 1.744616 2.097573  
N66 1.683216 3.103795 0.379176  
C67 2.026454 3.981883 -0.463900  
C68 3.407295 4.180529 -0.988361  
C69 3.627605 5.046247 -2.067173  
C70 4.503161 3.514275 -0.418945  
C71 4.911103 5.223967 -2.585643  
C72 5.785465 3.693338 -0.928624  
C73 5.992502 4.547186 -2.018460  
H74 2.780872 5.571390 -2.505608  
H75 4.316657 2.848662 0.418357  
H76 5.069004 5.888927 -3.430854  
H77 6.626900 3.170439 -0.480555  
H78 6.993107 4.685550 -2.419287  
C79 -0.395160 -0.698585 1.232882  
O80 -1.208513 -1.501503 1.138606

=====  
<sup>35</sup>-TS  
=====

Mn 0.576846317 1.004377524 0.615334292  
N 0.013995049 0.759326714 -1.299067193  
C -0.751122662 1.777654344 -1.867664200  
C -1.440388276 2.690588049 -1.037865887  
C -2.175002167 3.747161446 -1.570450854  
C -2.252577325 3.924433827 -2.952125732  
C -1.576178107 3.034552946 -3.791067294  
C -0.836195054 1.981402093 -3.263684094  
H -0.271084091 1.331814431 -3.924232736  
H -1.608490047 3.173322493 -4.868855229  
H -2.820069032 4.752755688 -3.365201805  
H -2.667975737 4.439625919 -0.896371695  
S -1.318696328 2.486772189 0.746085216  
B -0.007530895 3.836837305 1.076189711  
O -0.151740571 5.025893089 0.374276996  
C 0.347705440 6.092995656 1.219788072  
C 0.174310260 5.474484820 2.653725364  
O 0.364746296 4.054415782 2.402480893  
C -1.245815409 5.644662600 3.207016823  
H -1.990587487 5.326358332 2.472667927

H -1.356622026 5.018384600 4.096860979  
H -1.447964887 6.683167405 3.486050581  
C 1.202648958 5.944361230 3.678465809  
H 0.982088787 5.512486561 4.659324823  
H 2.213778238 5.649335718 3.392581342  
H 1.171672683 7.034729736 3.778230774  
C 1.814489187 6.358017406 0.869699175  
H 2.195338948 7.236291966 1.400243830  
H 2.438835413 5.499069344 1.115729095  
H 1.902792428 6.534830069 -0.204911610  
C -0.489522871 7.339524088 0.947130958  
H -1.557329116 7.133811777 1.039632822  
H -0.222810620 8.145099750 1.639976436  
H -0.299104650 7.689604196 -0.071596014  
C 0.055322598 -0.423234279 -1.974074518  
C 0.875593307 -1.553686364 -1.735119341  
C 1.972325983 -1.655900663 -0.813907228  
C 2.653195058 -2.860725858 -0.630031198  
C 2.313451708 -4.001122115 -1.355619697  
C 1.272175872 -3.920521255 -2.300406927  
C 0.581806684 -2.740200243 -2.481076773  
H -0.229645682 -2.698148896 -3.204042029  
H 1.005355789 -4.793020656 -2.890624974  
H 2.855558885 -4.928901857 -1.203283002  
H 3.473369663 -2.892386610 0.082273334  
S 2.575004165 -0.229804388 0.073609608  
C 3.399344630 0.647148285 -1.307165800  
H 3.962583637 1.480114007 -0.891496910  
H 4.069663346 -0.060445442 -1.797940310  
H 2.644117742 1.016806052 -2.001181195  
H -0.677994143 -0.546718521 -2.771278895  
H 1.122194023 3.474074125 -1.575310669  
C 0.962078119 1.369445650 5.058988972  
C 2.111490433 2.283560849 4.599111839  
C 2.360112893 1.830968207 3.158606200  
H 3.006815655 2.194685100 5.221085712  
H 1.783505079 3.325304163 4.603237699  
C 0.128358518 1.259657777 3.785634198  
H 1.341440094 0.383733863 5.351480668  
H 0.390193358 1.781463863 5.895418579  
O 1.105659894 1.233407334 2.721459604  
H -0.464869395 0.345197800 3.709525874  
H -0.515987882 2.134275526 3.649247372  
H 3.124722406 1.048669154 3.085420553  
H 2.584032232 2.637488266 2.461565591  
N 1.640522408 2.759045297 0.326497466  
C 1.871417398 3.371359143 -0.769666648  
C 3.155293588 4.035299555 -1.107184394  
C 3.288186147 4.703172001 -2.331935402  
C 4.247633434 4.002763592 -0.225395891  
C 4.486397152 5.333107382 -2.669670772  
C 5.443474679 4.628154616 -0.560809641  
C 5.565550990 5.296921349 -1.784780660  
H 2.441625029 4.728091155 -3.015119966  
H 4.123244851 3.480352448 0.719058262  
H 4.580156831 5.851713179 -3.620092516  
H 6.284775356 4.599526756 0.126901299  
H 6.500032541 5.786454146 -2.046055851  
C -0.202084633 -0.583308459 1.136072164

O -0.709800029 -1.548232192 1.513237939

15-TS

Mn 0.648680884 1.039640409 0.496232473  
N -0.123681562 0.655357440 -1.281213381  
C -0.923475311 1.674936760 -1.843982952  
C -1.604618931 2.568963823 -0.996027993  
C -2.423013977 3.571631674 -1.511739173  
C -2.565246772 3.721532270 -2.891707002  
C -1.869186569 2.864808361 -3.746831547  
C -1.057325493 1.856214737 -3.233062384  
H -0.488265711 1.222000248 -3.904999071  
H -1.946879734 2.988864071 -4.823681025  
H -3.197368764 4.508498217 -3.291697342  
H -2.925087381 4.247302211 -0.827931264  
S -1.359439194 2.397374901 0.776405365  
B -0.300567730 3.924209140 1.036223746  
O -0.514710323 5.071068655 0.313724181  
C -0.014517705 6.191606844 1.098459639  
C 0.048930925 5.581620174 2.551613441  
O 0.223715545 4.159278208 2.294519549  
C -1.268913838 5.721528567 3.323940384  
H -2.112030931 5.357257566 2.730312350  
H -1.210536969 5.116293263 4.233008066  
H -1.463015611 6.759648533 3.609427031  
C 1.214446239 6.081517205 3.400240930  
H 1.159826976 5.648354480 4.403123282  
H 2.175185529 5.808414804 2.960598771  
H 1.173912259 7.170960477 3.503529653  
C 1.357225635 6.604675000 0.557986471  
H 1.704729028 7.522943530 1.041678134  
H 2.106642764 5.828436322 0.707793982  
H 1.276799955 6.789048971 -0.516398157  
C -1.000763085 7.345689776 0.931585059  
H -2.022170416 7.038921554 1.162707527  
H -0.728575314 8.184498596 1.581091112  
H -0.978647806 7.695595297 -0.104391242  
C -0.076190874 -0.500102901 -1.964857294  
C 0.786168036 -1.622126429 -1.730261349  
C 1.976429275 -1.627041644 -0.942921037  
C 2.707467890 -2.797558565 -0.748829973  
C 2.308635602 -3.998767468 -1.337493583  
C 1.173011202 -4.009400259 -2.158610742  
C 0.437944941 -2.851810441 -2.352522770  
H -0.449044782 -2.877626505 -2.981347117  
H 0.860675961 -4.930225891 -2.643752437  
H 2.883168171 -4.905162028 -1.173611208  
H 3.607792673 -2.757513860 -0.142077722  
S 2.627256417 -0.106838923 -0.252628668  
C 3.120106208 0.718390240 -1.817218167  
H 3.789645418 1.537129187 -1.563429990  
H 3.638080935 -0.015748653 -2.436778582  
H 2.233712470 1.106914513 -2.316293329  
H -0.829844956 -0.650105088 -2.737581921  
H 1.382020703 4.370596529 -1.292849014  
C 1.328350440 1.432611468 4.902455398  
C 2.337149937 2.482791080 4.405792775  
C 2.473950864 2.158373581 2.912910225

H 3.296808492 2.442136057 4.928719574  
H 1.919843497 3.485673340 4.527585482  
C 0.396326848 1.317057365 3.700430114  
H 1.823998143 0.473218535 5.089338506  
H 0.803290252 1.733701474 5.813588507  
O 1.275660340 1.420705592 2.561769803  
H -0.128968794 0.362959547 3.624612576  
H -0.326284517 2.140797199 3.667360875  
H 3.325635768 1.503167721 2.696970555  
H 2.520642692 3.040465573 2.276414144  
N 1.527902858 2.740269421 -0.008169079  
C 2.015397040 3.678079011 -0.695401335  
C 3.466295227 4.038607776 -0.781485096  
C 3.880426423 5.058457534 -1.649572505  
C 4.433470328 3.392520319 0.004859888  
C 5.224885693 5.420246871 -1.740072854  
C 5.776327064 3.752131276 -0.081181078  
C 6.178738190 4.768890041 -0.954402154  
H 3.134441880 5.567810966 -2.257086379  
H 4.105227606 2.600388637 0.670228925  
H 5.530034058 6.210306002 -2.421643661  
H 6.514262252 3.241002098 0.532246421  
H 7.226182407 5.050361254 -1.020554895  
C -0.033874630 -0.530116617 1.138131609  
O -0.497770480 -1.501150007 1.568062044

5

Mn1 1.079667 1.033751 0.470636  
N2 0.014096 0.488897 -1.280328  
C3 -0.574990 1.601515 -1.885283  
C4 -1.183177 2.625719 -1.114315  
C5 -1.738506 3.754399 -1.718816  
C6 -1.693967 3.911686 -3.102960  
C7 -1.095941 2.918187 -3.882119  
C8 -0.552030 1.787229 -3.286606  
H9 -0.050713 1.040512 -3.894101  
H10 -1.040398 3.031257 -4.961917  
H11 -2.119909 4.798159 -3.563036  
H12 -2.194145 4.517599 -1.098841  
S13 -1.278275 2.408749 0.678439  
B14 -0.642316 3.999221 1.336342  
O15 -0.441607 5.130354 0.609523  
C16 0.091214 6.133514 1.535624  
C17 -0.415929 5.593926 2.923236  
O18 -0.463757 4.145680 2.688493  
C19 -1.850066 6.021827 3.252942  
H20 -2.522055 5.830166 2.411622  
H21 -2.205888 5.443932 4.110179  
H22 -1.900494 7.085121 3.504534  
C23 0.507369 5.881967 4.100308  
H24 0.081654 5.466704 5.018444  
H25 1.497825 5.451267 3.955511  
H26 0.614755 6.963216 4.236430  
C27 1.613718 6.119349 1.394976  
H28 2.074898 6.875304 2.037601  
H29 2.030772 5.139630 1.635212  
H30 1.882088 6.335528 0.359165  
C31 -0.467751 7.493608 1.130706

H32 -1.556962 7.481653 1.064688  
H33 -0.167038 8.260906 1.852015  
H34 -0.070521 7.772969 0.151201  
C35 -0.082155 -0.693255 -1.940140  
C36 0.609936 -1.908898 -1.683648  
C37 1.801466 -2.116159 -0.903661  
C38 2.290715 -3.409326 -0.678952  
C39 1.669926 -4.533079 -1.217093  
C40 0.546072 -4.352598 -2.045278  
C41 0.047264 -3.087367 -2.272595  
H42 -0.834033 -2.965630 -2.898458  
H43 0.063523 -5.210578 -2.505839  
H44 2.067433 -5.524513 -1.024052  
H45 3.193868 -3.522549 -0.085275  
S46 2.798039 -0.787011 -0.236004  
C47 3.353749 0.098493 -1.745830  
H48 3.861620 0.998670 -1.395387  
H49 4.024796 -0.540740 -2.322374  
H50 2.482183 0.388464 -2.333312  
H51 -0.861887 -0.761907 -2.701551  
H52 1.375711 3.760204 -1.348643  
C53 1.285309 2.205614 4.663379  
C54 2.505868 2.698587 3.863523  
C55 2.886393 1.466371 3.055400  
H56 3.318249 3.067493 4.496621  
H57 2.208673 3.485697 3.166533  
C58 0.645683 1.158503 3.729280  
H59 1.602110 1.742598 5.603771  
H60 0.584119 3.010219 4.891196  
O61 1.605899 0.913797 2.668019  
H62 0.429492 0.212046 4.237844  
H63 -0.267626 1.527406 3.257918  
H64 3.432121 0.723816 3.654730  
H65 3.420313 1.691450 2.130803  
N66 2.262971 2.590187 0.141668  
C67 2.259306 3.517888 -0.720031  
C68 3.424646 4.408689 -1.003206  
C69 3.334349 5.388832 -1.999648  
C70 4.616170 4.291332 -0.272140  
C71 4.410938 6.237273 -2.262957  
C72 5.691074 5.136199 -0.530903  
C73 5.591440 6.113978 -1.527872  
H74 2.409901 5.481113 -2.567094  
H75 4.662897 3.526090 0.498200  
H76 4.330730 6.994237 -3.039146  
H77 6.610142 5.038968 0.042519  
H78 6.431108 6.774335 -1.728981  
C79 -0.407029 -0.865019 1.350356  
O80 -1.189778 -1.685534 1.285681

=====  
35  
=====

Mn 0.851621863 0.842516116 0.608764693  
N 0.024098702 0.577657340 -1.236809864  
C -0.624752276 1.677578622 -1.817674677  
C -1.257768470 2.679000649 -1.038995452  
C -1.872768747 3.777487608 -1.643245063  
C -1.863717556 3.930929971 -3.027414318  
C -1.230681446 2.965486553 -3.812462476

C -0.623869182 1.865065421 -3.219755118  
H -0.090563053 1.148025630 -3.834827984  
H -1.194415740 3.076091816 -4.893184471  
H -2.340190993 4.794079815 -3.482272369  
H -2.348574159 4.523429178 -1.017171707  
S -1.305577156 2.506073410 0.753234082  
B -0.611743620 4.104349058 1.326569528  
O -0.428035050 5.209533388 0.554260770  
C 0.165022453 6.232789109 1.417392449  
C -0.260978895 5.741919461 2.850738177  
O -0.362122298 4.291838249 2.662648825  
C -1.656005959 6.221009407 3.266636325  
H -2.390719046 6.024320661 2.480664208  
H -1.965452467 5.678634164 4.164155736  
H -1.660357310 7.292346607 3.488082443  
C 0.752810732 6.032363439 3.951528406  
H 0.373382748 5.674507889 4.913060410  
H 1.709734698 5.546650393 3.757639982  
H 0.919714988 7.111433364 4.035139695  
C 1.675305172 6.192731408 1.189622229  
H 2.185497913 6.969103836 1.767314430  
H 2.088800992 5.219958213 1.458874981  
H 1.888250789 6.350907923 0.130444784  
C -0.404173567 7.586216284 1.006614442  
H -1.495551618 7.584297792 1.007453979  
H -0.052925325 8.370448062 1.685634912  
H -0.064791104 7.832696335 -0.003076209  
C -0.007732413 -0.575932590 -1.952513599  
C 0.728446707 -1.784557137 -1.773723658  
C 1.913580717 -2.010278429 -0.997488381  
C 2.468537416 -3.288943980 -0.892355994  
C 1.912555760 -4.383335040 -1.551080457  
C 0.786646376 -4.179534366 -2.364997476  
C 0.223055083 -2.923733383 -2.473725533  
H -0.658671445 -2.787404691 -3.095652019  
H 0.349567512 -5.011950277 -2.910205119  
H 2.358682069 -5.367995003 -1.452050909  
H 3.366333664 -3.413557201 -0.293276097  
S 2.805833081 -0.691848534 -0.184269777  
C 3.471468663 0.202632947 -1.638476508  
H 4.083798461 1.023361822 -1.263006905  
H 4.073828146 -0.483555461 -2.236628019  
H 2.645823349 0.609785274 -2.223422305  
H -0.784111306 -0.635765239 -2.715752733  
H 1.556254538 2.903238010 -1.705297821  
C 1.426164673 2.369580739 4.581359758  
C 2.629544247 2.688054618 3.674271283  
C 2.877880514 1.348694543 2.995294863  
H 3.498375613 3.063166630 4.223339870  
H 2.344853820 3.408277420 2.902087945  
C 0.653233037 1.304370090 3.780213952  
H 1.764798861 1.963583189 5.540645586  
H 0.803189394 3.243868167 4.772764915  
O 1.544242126 0.862991026 2.717200383  
H 0.375800955 0.433075107 4.383519114  
H -0.240366197 1.711445695 3.304733788  
H 3.388840789 0.630774021 3.651834158  
H 3.391348705 1.424333818 2.037467528  
N 1.958120566 2.296219930 0.242112603

C 2.161792812 3.007679090 -0.788836150  
C 3.242855560 4.016005069 -0.900316783  
C 3.288295128 4.868858532 -2.012727780  
C 4.237832954 4.134832704 0.083807844  
C 4.290507724 5.832568723 -2.131020019  
C 5.239647263 5.093039584 -0.034430944  
C 5.268613884 5.949177924 -1.141361248  
H 2.522432814 4.777477758 -2.780358795  
H 4.197082159 3.467008704 0.939236995  
H 4.309727029 6.492325335 -2.994749519  
H 6.004169429 5.176087082 0.734216062  
H 6.051486662 6.697436762 -1.232724384  
C -0.270608384 -0.644344303 1.181060814  
O -1.001536272 -1.501177463 1.421383351

15

Mn 0.756088458 0.811167732 0.526251171  
N 0.086161325 0.590213672 -1.334376772  
C -0.578836198 1.711507141 -1.915526447  
C -1.192399684 2.659965967 -1.077469554  
C -1.859399409 3.762138211 -1.613233365  
C -1.889291304 3.964023967 -2.991682040  
C -1.245233670 3.057170302 -3.835510301  
C -0.595665406 1.946465696 -3.303177340  
H -0.051296517 1.278967318 -3.962001215  
H -1.229866148 3.222188998 -4.908932750  
H -2.396049517 4.833989929 -3.398905571  
H -2.325695689 4.476582129 -0.944882083  
S -1.083274746 2.385796836 0.693182024  
B -0.436656576 4.010159519 1.295155620  
O -0.360181641 5.143986782 0.548211370  
C 0.216530017 6.174284564 1.417865004  
C -0.145589000 5.630945274 2.847656266  
O -0.166829623 4.181544213 2.626320624  
C -1.556340512 6.017236845 3.305543451  
H -2.296335097 5.798811186 2.530299697  
H -1.813091347 5.434750025 4.194488803  
H -1.617063310 7.080376141 3.556528257  
C 0.873087214 5.961338142 3.932617424  
H 0.548019041 5.545515657 4.890527159  
H 1.859064997 5.558602419 3.701617596  
H 0.958331265 7.047232324 4.046936510  
C 1.719889763 6.193755756 1.145862991  
H 2.216960395 6.982722604 1.718140634  
H 2.175375491 5.233322421 1.391415015  
H 1.896332429 6.369148319 0.082459103  
C -0.420382507 7.511738837 1.059564067  
H -1.510474357 7.464756014 1.093750867  
H -0.081034571 8.291519114 1.749830856  
H -0.121971882 7.799518620 0.047871274  
C 0.108302439 -0.507760964 -2.083277836  
C 0.762701795 -1.766316984 -1.801244483  
C 1.806665011 -1.986326356 -0.862367241  
C 2.327542935 -3.266054105 -0.665167693  
C 1.848796936 -4.357846083 -1.390570583  
C 0.848596927 -4.155353623 -2.347407586  
C 0.326990188 -2.885627635 -2.550658830  
H -0.456535870 -2.741135505 -3.290776902

H 0.472565635 -4.989969732 -2.932233289  
H 2.258063560 -5.348349071 -1.217121280  
H 3.121167665 -3.400069325 0.064142985  
S 2.537210388 -0.639321615 0.068427152  
C 3.565527194 0.093802041 -1.262876049  
H 4.110115608 0.928980153 -0.822020235  
H 4.253378132 -0.664615686 -1.641347592  
H 2.919730591 0.474901674 -2.055167278  
H -0.496926170 -0.519244203 -2.988830711  
H 1.665347241 2.809290578 -1.824783185  
C 1.476643078 2.275507572 4.623098442  
C 2.667984318 2.660680919 3.725943067  
C 2.866124069 1.397931750 2.899935483  
H 3.558379226 2.955904191 4.289777191  
H 2.382556307 3.464250748 3.042831492  
C 0.675002687 1.293620739 3.742574098  
H 1.826877133 1.782294598 5.536458490  
H 0.871195977 3.138037111 4.908314715  
O 1.522613352 0.964918815 2.618003664  
H 0.410579286 0.369450197 4.270450808  
H -0.234288653 1.744931330 3.343504086  
H 3.392524471 0.609234215 3.457813912  
H 3.338804624 1.579180619 1.935682847  
N 1.954592459 2.308718695 0.185569304  
C 2.205042326 2.964461605 -0.867585816  
C 3.263665622 4.006249584 -0.980366585  
C 3.301965676 4.849021830 -2.099694074  
C 4.237098067 4.171168510 0.017434308  
C 4.271375922 5.846853439 -2.212000187  
C 5.209916913 5.160090089 -0.094401415  
C 5.229276533 6.006627312 -1.208727185  
H 2.551575076 4.723643618 -2.878495822  
H 4.196572675 3.515496842 0.882541912  
H 4.280371104 6.500279565 -3.081080289  
H 5.958162607 5.276079452 0.686330090  
H 5.987423248 6.780720071 -1.294576347  
C -0.263400166 -0.590771241 1.126340758  
O -0.933875856 -1.474129860 1.469103311

6-TS

Mn1 1.591806 0.980288 0.417515  
N2 0.729391 0.377520 -1.386449  
C3 0.396104 1.482997 -2.183611  
C4 -0.013325 2.710891 -1.600803  
C5 -0.254271 3.834550 -2.396603  
C6 -0.099547 3.773440 -3.782168  
C7 0.299890 2.573164 -4.373306  
C8 0.547617 1.452334 -3.588218  
H9 0.916342 0.543155 -4.049612  
H10 0.441482 2.511873 -5.449830  
H11 -0.284889 4.655791 -4.388161  
H12 -0.543523 4.762364 -1.915064  
S13 -0.205363 2.832942 0.181915  
B14 0.927471 4.407879 0.599768  
O15 0.436789 5.639529 0.098282  
C16 0.694441 6.630942 1.108694  
C17 0.598381 5.781523 2.427062  
O18 1.156597 4.516370 2.009965

C19 -0.853827 5.531709 2.858868  
H20 -1.446487 5.166586 2.015871  
H21 -0.865372 4.766107 3.641465  
H22 -1.324252 6.436563 3.256835  
C23 1.420586 6.313556 3.597059  
H24 1.295519 5.661514 4.467889  
H25 2.483547 6.347837 3.349479  
H26 1.093290 7.320390 3.878315  
C27 2.103864 7.197534 0.873354  
H28 2.329010 8.030649 1.547594  
H29 2.865487 6.424494 1.002678  
H30 2.170225 7.553900 -0.158311  
C31 -0.348479 7.738135 0.977723  
H32 -1.360261 7.328459 0.974206  
H33 -0.259795 8.458057 1.799092  
H34 -0.198400 8.274775 0.035927  
C35 0.586871 -0.836481 -1.955976  
C36 1.219350 -2.080627 -1.674044  
C37 2.220612 -2.426417 -0.701952  
C38 2.802316 -3.702575 -0.694507  
C39 2.411122 -4.700505 -1.578901  
C40 1.406146 -4.404344 -2.518494  
C41 0.842623 -3.148534 -2.556723  
H42 0.081554 -2.933878 -3.303417  
H43 1.077755 -5.161496 -3.225978  
H44 2.876385 -5.680665 -1.544826  
H45 3.584882 -3.910122 0.031314  
S46 2.831683 -1.319605 0.567038  
C47 2.181611 -2.125929 2.087582  
H48 2.247957 -1.384991 2.886869  
H49 1.139303 -2.414002 1.939946  
H50 2.776004 -3.007991 2.331427  
H51 -0.105452 -0.887707 -2.798418  
H52 2.012894 4.027147 0.015596  
C53 1.718147 2.308097 4.684093  
C54 3.071624 2.652546 4.038815  
C55 3.292568 1.448457 3.128790  
H56 3.878563 2.783735 4.765228  
H57 2.964694 3.560979 3.440214  
C58 0.950196 1.665500 3.524598  
H59 1.851853 1.597070 5.507599  
H60 1.196378 3.187711 5.070223  
O61 1.969068 1.127133 2.625859  
H62 0.298113 0.840912 3.826993  
H63 0.383492 2.407928 2.961271  
H64 3.675594 0.581194 3.685200  
H65 3.928199 1.625309 2.259203  
C66 -0.408100 -0.319612 1.183228  
O67 -1.349968 -0.923738 0.975637  
C68 3.441660 3.397575 0.144318  
H69 3.417038 3.676874 1.200695  
C70 5.388906 6.119786 -2.525803  
C71 4.361331 5.289806 -2.989907  
H72 4.052067 5.333847 -4.031070  
C73 3.722072 4.417375 -2.115573  
C74 5.761638 6.084419 -1.181370  
H75 5.889063 6.800567 -3.210101  
H76 6.555120 6.732509 -0.818077  
C77 5.114457 5.215534 -0.299443

H78 2.899735 3.791906 -2.456534  
C79 4.107880 4.366470 -0.766719  
H80 5.403217 5.181434 0.748843  
N81 3.323943 2.109051 -0.174143  
B82 4.081112 1.486349 -1.226191  
C83 4.565194 0.177596 -3.026572  
C84 5.889368 0.617721 -2.302767  
O85 3.563724 0.487192 -2.023784  
C86 4.246155 1.041517 -4.253706  
C87 4.464064 -1.303950 -3.372690  
O88 5.426081 1.702982 -1.453551  
C89 6.983010 1.151050 -3.222587  
C90 6.445876 -0.471613 -1.376484  
H91 7.862784 1.422625 -2.631539  
H92 7.281325 0.388115 -3.950101  
H93 6.650186 2.040581 -3.760228  
H94 5.662742 -0.867657 -0.723113  
H95 6.876418 -1.300593 -1.947181  
H96 7.229437 -0.037141 -0.748883  
H97 4.329575 2.105766 -4.014692  
H98 4.915400 0.814131 -5.089347  
H99 3.216849 0.848900 -4.564657  
H100 3.494879 -1.505311 -3.837480  
H101 5.253317 -1.590252 -4.076287  
H102 4.532736 -1.932479 -2.484007

=====  
6-TS'  
=====

Mn -2.673910423 0.008975325 -1.177273716  
C -4.261847689 0.556733313 0.699917957  
O -4.976157393 1.003107989 1.461969846  
N -1.435307203 -1.401351158 -0.210646064  
C -1.587727486 -1.190495336 1.190266965  
C -2.643520689 -1.737889656 1.960972488  
C -2.656433200 -1.484205744 3.347443519  
C -1.699582865 -0.677749672 3.950083016  
C -0.691869316 -0.089848947 3.175196919  
C -0.648395806 -0.349564921 1.812372751  
H 0.124298776 0.081760400 1.183236009  
H 0.056436162 0.550273537 3.633418469  
H -1.746977234 -0.497452430 5.020301849  
H -3.455625646 -1.912574701 3.946653859  
S -4.079843308 -2.621131891 1.350893557  
C -1.409560919 -2.693343288 -0.593529627  
C -0.916392889 -3.183636573 -1.919896506  
C -0.825702794 -2.470151578 -3.135429907  
C -0.393567819 -3.128733685 -4.296746181  
C -0.045841252 -4.476862194 -4.282721874  
C -0.129745729 -5.191106366 -3.087640577  
C -0.558955276 -4.545300427 -1.934099292  
H -0.639915302 -5.109132670 -1.008258953  
H 0.133061254 -6.244102497 -3.052756617  
H 0.283543024 -4.961817333 -5.196837145  
H -0.337966442 -2.563409486 -5.222143856  
S -1.283276384 -0.744373114 -3.360160198  
C 0.234810345 0.105053451 -2.772166252  
H 0.054098738 1.173905910 -2.902931056  
H 0.386352720 -0.132614338 -1.717638431  
H 1.088344850 -0.210007183 -3.374825084

H -1.175527523 -3.407805537 0.202353525  
H -3.393110409 1.617444500 -3.770868586  
C 0.127895750 4.532270398 -4.102670398  
C -0.072530594 4.656922599 -5.482750664  
C -1.143419552 3.975088222 -6.079424832  
H 0.592307923 5.271080771 -6.083133016  
H 0.956275176 5.053829586 -3.628581937  
C -0.716539584 3.750784202 -3.325530196  
H -0.547597778 3.679762190 -2.257797877  
C -1.811792667 3.054156365 -3.909396506  
H -1.309552180 4.059449395 -7.150722371  
C -1.992135691 3.190704534 -5.315167937  
H -2.817160874 2.663154572 -5.789477735  
C -2.689791836 2.202652149 -3.177805964  
N -2.647219239 1.918310529 -1.834572632  
C -1.949142734 3.460475824 1.377904355  
C -2.587167128 4.660133443 0.579033118  
O -2.478665837 4.217012197 -0.796529333  
C -1.852706168 5.989702289 0.723306645  
C -4.082467368 4.841919245 0.872457218  
O -2.251567762 2.336328313 0.515542421  
C -0.421430877 3.544944360 1.474765913  
C -2.554846439 3.202773639 2.754422974  
B -2.448703404 2.835250393 -0.778851074  
H 0.022001110 3.726258742 0.491052406  
H -0.101980517 4.340132462 2.154839688  
H -0.043978748 2.590505531 1.850512072  
H -2.082268511 2.324611375 3.202134853  
H -2.391043206 4.062768197 3.412438034  
H -3.626506285 3.009089052 2.693015283  
H -2.361960139 6.756520324 0.132470827  
H -1.840807266 6.313779954 1.769631591  
H -0.824175798 5.917510799 0.365225644  
H -4.616193814 3.890411143 0.790448961  
H -4.253143000 5.251895421 1.872558649  
H -4.503173228 5.531527560 0.135572699  
B -3.991293473 -2.824940192 -0.554141639  
O -4.047517951 -1.642996078 -1.433912137  
O -4.974310326 -3.726651091 -0.991175735  
C -5.243553520 -1.772962091 -2.259483137  
C -5.407810952 -3.329782875 -2.306415422  
C -6.386053846 -1.068056171 -1.520731044  
C -4.985786297 -1.103714263 -3.604292505  
C -4.477969308 -3.988164298 -3.336927648  
C -6.845018045 -3.803474380 -2.506742602  
H -3.452805546 -3.622142389 -3.237551688  
H -4.470937507 -5.066707565 -3.159099299  
H -4.816850785 -3.807211701 -4.361745077  
H -6.869893531 -4.896050855 -2.546626083  
H -7.485549900 -3.481093071 -1.683995788  
H -7.253223274 -3.417322125 -3.447195946  
H -7.311596741 -1.090260033 -2.103325303  
H -6.565831770 -1.533259825 -0.548672057  
H -6.112471003 -0.021205381 -1.357891607  
H -4.091192580 -1.496810061 -4.088591585  
H -5.840601122 -1.249918751 -4.272525839  
H -4.850947546 -0.026549046 -3.462309051  
H -2.735982984 -3.249306100 -0.716416578

6-TS"

Mn -2.572215288 0.182683712 -1.143417114  
C -0.702189830 1.193461391 -0.151475974  
O 0.367572675 1.240991858 0.252728154  
N -1.444601949 -1.457898673 -0.654725616  
C -1.660274624 -1.852546798 0.691194775  
C -2.971375981 -1.968714465 1.222334292  
C -3.140279616 -2.355004919 2.558269062  
C -2.046552669 -2.610426826 3.386015188  
C -0.753297488 -2.476958638 2.872787471  
C -0.567398848 -2.105080597 1.544055475  
H 0.435633684 -1.971054139 1.149198934  
H 0.111306171 -2.653853109 3.507009272  
H -2.203476027 -2.903877689 4.419897664  
H -4.151603150 -2.441873724 2.943111612  
S -4.432531780 -1.648308015 0.222132373  
C -0.552709262 -2.187879932 -1.344841168  
C -0.067979094 -2.052817907 -2.687981297  
C -0.230542453 -0.994353208 -3.641612947  
C 0.286688501 -1.116961162 -4.937399657  
C 0.998320199 -2.239429263 -5.349222772  
C 1.199993245 -3.278079004 -4.426598654  
C 0.684695970 -3.179343449 -3.149879703  
H 0.839056218 -4.001166489 -2.454776944  
H 1.754958698 -4.167223917 -4.713750959  
H 1.380781707 -2.307075021 -6.362894150  
H 0.116660540 -0.302827217 -5.636985287  
S -1.008792484 0.588800087 -3.306647313  
C 0.499640660 1.610766619 -3.039020362  
H 0.176908007 2.619118804 -2.767294263  
H 1.120697409 1.194743379 -2.244027035  
H 1.070061009 1.649815506 -3.969053205  
H -0.186654464 -3.082986781 -0.839934315  
H -4.948804001 2.106013464 -1.080036688  
C -8.135454901 1.828302441 -4.085166914  
C -9.228053287 1.928144354 -3.222221052  
C -9.042585048 1.764511396 -1.847668054  
H -10.219269114 2.130984473 -3.618411391  
H -8.271629098 1.956058343 -5.155741836  
C -6.864801307 1.564551106 -3.577666388  
H -6.012787464 1.493633974 -4.245695324  
C -6.672546516 1.400270122 -2.199302770  
H -9.890185405 1.832277905 -1.171327636  
C -7.771609784 1.506730937 -1.338096999  
H -7.626964934 1.358780849 -0.271711283  
C -5.283770886 1.244620358 -1.663006902  
N -4.303321843 0.582824326 -2.283526337  
C -3.845590144 -2.495715879 -4.157208711  
C -5.387700130 -2.247850664 -4.372271147  
O -5.688485604 -1.236624745 -3.371532602  
C -6.275316115 -3.459719483 -4.114986058  
C -5.711686351 -1.620932183 -5.733663793  
O -3.408512301 -1.204015113 -3.653836556  
C -3.547317463 -3.531023945 -3.068329113  
C -3.054851544 -2.813607775 -5.422545288  
B -4.512855041 -0.583865635 -3.095283699  
H -4.090758738 -3.301055641 -2.149345438  
H -3.810871826 -4.540290555 -3.398982614

H -2.479370129 -3.503161661 -2.841644711  
H -2.000025449 -2.947202353 -5.170251220  
H -3.422215461 -3.737856396 -5.881437731  
H -3.125126687 -2.006288718 -6.154123896  
H -7.322439999 -3.190320002 -4.280996628  
H -6.017874481 -4.277935681 -4.796198202  
H -6.174227683 -3.811258417 -3.087065351  
H -5.066666845 -0.758763336 -5.928296614  
H -5.588108998 -2.339490543 -6.549368447  
H -6.748848192 -1.274402072 -5.723326914  
B -4.822769555 0.177440771 0.744597666  
O -3.626254306 1.008702084 0.646536329  
O -5.455157763 0.468842443 1.967075376  
C -3.522104584 1.829690072 1.843205344  
C -4.995823580 1.760368032 2.404618487  
C -2.501320909 1.180061741 2.781766465  
C -3.061021592 3.228134181 1.438367234  
C -5.916076885 2.836478594 1.804721928  
C -5.084462452 1.809406974 3.929246178  
H -5.869587913 2.852431754 0.713494161  
H -6.947237097 2.610663413 2.090344366  
H -5.666047004 3.836098723 2.173720113  
H -6.133805655 1.774226705 4.235218872  
H -4.571697421 0.959506727 4.381729671  
H -4.645699193 2.735725751 4.316147633  
H -2.339214346 1.796000540 3.671698445  
H -2.824837068 0.185846750 3.089311894  
H -1.544093850 1.069253769 2.269146193  
H -3.678539393 3.636496786 0.635848088  
H -3.102433993 3.909870755 2.294385415  
H -2.026597319 3.195382302 1.085028063  
H -5.564657976 0.494035860 -0.326734695

6

Mn1 -1.318165 0.075284 -1.442982  
C2 -1.364095 -2.962047 -1.667899  
O3 -1.854116 -3.944631 -1.282780  
N4 0.482811 -0.838878 -0.259768  
C5 0.300974 -0.624376 1.135824  
C6 -1.021751 -0.560361 1.642945  
C7 -1.166318 -0.421213 3.036409  
C8 -0.066246 -0.326419 3.883540  
C9 1.233062 -0.345871 3.364147  
C10 1.406981 -0.496377 1.991016  
H11 2.406052 -0.481793 1.563243  
H12 2.094313 -0.232063 4.015369  
H13 -0.223469 -0.211941 4.952933  
H14 -2.171795 -0.385999 3.444721  
S15 -2.447096 -0.704070 0.608013  
C16 1.374029 -1.709993 -0.596873  
C17 1.724534 -2.195060 -1.935025  
C18 1.387075 -1.623875 -3.188283  
C19 1.678763 -2.322710 -4.366480  
C20 2.311671 -3.565969 -4.337554  
C21 2.693805 -4.114594 -3.113349  
C22 2.409576 -3.428516 -1.938642  
H23 2.691667 -3.867445 -0.984841  
H24 3.206310 -5.070768 -3.071382

H25 2.525456 -4.086244 -5.266306  
H26 1.418969 -1.867968 -5.317599  
S27 0.548569 -0.060524 -3.406826  
C28 1.663719 1.134196 -2.565714  
H29 1.418526 2.104728 -2.999804  
H30 1.479564 1.151107 -1.491164  
H31 2.698466 0.870168 -2.790534  
H32 1.891333 -2.250688 0.203488  
H33 -2.429986 1.605823 -3.781764  
C34 0.679144 4.839157 -4.747458  
C35 0.392429 4.737966 -6.114328  
C36 -0.617025 3.854571 -6.528162  
H37 0.935814 5.335652 -6.840105  
H38 1.447301 5.530853 -4.408144  
C39 -0.005331 4.076650 -3.808981  
H40 0.207279 4.210419 -2.755586  
C41 -1.019063 3.158082 -4.209255  
H42 -0.857982 3.764671 -7.585046  
C43 -1.306615 3.087351 -5.603206  
H44 -2.079125 2.398621 -5.941215  
C45 -1.708123 2.280734 -3.319945  
N46 -1.442901 2.031769 -2.003779  
C47 -0.018099 3.425041 1.019661  
C48 -0.940831 4.603287 0.530883  
O49 -1.173219 4.265251 -0.858337  
C50 -0.304566 5.988347 0.597190  
C51 -2.310265 4.605872 1.224211  
O52 -0.457501 2.333591 0.180494  
C53 1.467374 3.653035 0.705281  
C54 -0.197969 3.037866 2.483326  
B55 -1.040545 2.888850 -0.962569  
H56 1.606520 3.935901 -0.342937  
H57 1.905293 4.431145 1.338168  
H58 2.005466 2.717027 0.882611  
H59 0.485715 2.226147 2.740477  
H60 0.014323 3.892435 3.135522  
H61 -1.211845 2.686158 2.677321  
H62 -1.012655 6.736462 0.228771  
H63 -0.040568 6.244021 1.629195  
H64 0.594789 6.044025 -0.019410  
H65 -2.762513 3.610239 1.192050  
H66 -2.236068 4.923328 2.268931  
H67 -2.970387 5.298317 0.694317  
C68 -4.946187 -1.584526 -3.568521  
C69 -3.825410 -2.323622 -4.319509  
C70 -2.645787 -1.364440 -4.157049  
H71 -3.605975 -3.278077 -3.826956  
H72 -4.059267 -2.523629 -5.368521  
C73 -4.192475 -1.010549 -2.370614  
H74 -5.768113 -2.238603 -3.265686  
H75 -5.355799 -0.779118 -4.188351  
O76 -2.856938 -0.722610 -2.874349  
H77 -4.101680 -1.733841 -1.552574  
H78 -4.600281 -0.078041 -1.974364  
H79 -1.673512 -1.864051 -4.133078  
H80 -2.624338 -0.587014 -4.929824

36

Mn -0.902484880 -0.248558834 -1.563958274  
C -1.765170375 -2.968952059 -1.292858941  
O -2.074216163 -3.674130712 -0.454833838  
N 0.215241037 -1.082108466 -0.152136427  
C -0.052751837 -0.687085210 1.175263937  
C -1.319337517 -0.113439193 1.455064814  
C -1.642188307 0.225219314 2.773559686  
C -0.721088341 0.048722921 3.809813612  
C 0.544096760 -0.468573518 3.527524391  
C 0.874892959 -0.831602285 2.221584415  
H 1.870479855 -1.204505035 2.001225898  
H 1.280597800 -0.581204740 4.318750446  
H -0.987944918 0.329099712 4.825337284  
H -2.625088013 0.640324919 2.979926689  
S -2.437657683 0.164351471 0.109008600  
C 1.038681065 -2.151517362 -0.316867718  
C 1.514805088 -2.734074779 -1.520503143  
C 1.487062764 -2.166792227 -2.840180879  
C 1.917999975 -2.894134033 -3.954550101  
C 2.410271649 -4.190419888 -3.827720644  
C 2.505892566 -4.752421440 -2.538193379  
C 2.083689977 -4.046011127 -1.431552019  
H 2.149365245 -4.503592837 -0.446996881  
H 2.910745072 -5.753065330 -2.410853349  
H 2.732958754 -4.744716943 -4.703291776  
H 1.876082827 -2.420683127 -4.932376631  
S 0.957512749 -0.488166821 -3.118054202  
C 2.253634895 0.470669030 -2.234497469  
H 1.922792531 1.509031203 -2.204842891  
H 2.329090972 0.097055965 -1.213578014  
H 3.199148615 0.368004225 -2.770183528  
H 1.263002260 -2.722820273 0.582730498  
H -1.453579902 1.333487335 -4.143411856  
C -1.129140212 5.877707690 -4.561538217  
C -1.258060056 5.741250466 -5.947115888  
C -1.380267751 4.471787739 -6.513952120  
H -1.268914080 6.622900238 -6.581756907  
H -1.046717302 6.867039219 -4.120613911  
C -1.114865540 4.756176064 -3.737790846  
H -1.046783770 4.874533500 -2.663769813  
C -1.232679029 3.471018217 -4.298621214  
H -1.483989564 4.359311870 -7.589246508  
C -1.371981876 3.347657978 -5.693060778  
H -1.465432569 2.356260157 -6.130531578  
C -1.216333611 2.211588258 -3.534024183  
N -0.942540002 1.967690830 -2.308262523  
C 0.642760390 3.596033761 0.552178109  
C -0.792891118 4.263940206 0.574553978  
O -1.337241205 3.893877563 -0.731468148  
C -0.787184057 5.787581882 0.664736805  
C -1.731861952 3.671303389 1.625697242  
O 0.487191804 2.529273852 -0.425439729  
C 1.735924404 4.517606902 -0.000507817  
C 1.076290822 2.968741730 1.872870034  
B -0.621309357 2.815089676 -1.175291854  
H 1.444372027 4.940567769 -0.967255137  
H 1.958933018 5.338294188 0.687506666  
H 2.647843959 3.932639246 -0.149284729  
H 2.068769300 2.523950893 1.758087146

H 1.130363702 3.729039135 2.659527407  
H 0.392846500 2.178743160 2.184309063  
H -1.815789434 6.157839749 0.639990179  
H -0.329849371 6.113294543 1.604655639  
H -0.241583231 6.243862732 -0.163738361  
H -1.782911090 2.586387508 1.537945211  
H -1.407980726 3.933387132 2.637135560  
H -2.737617614 4.070118109 1.465615415  
C -4.479447085 -1.112417429 -4.069449662  
C -3.478093428 -2.230345686 -4.406661087  
C -2.137865505 -1.525836229 -4.211881447  
H -3.572100300 -3.052949345 -3.689128467  
H -3.595577336 -2.635275198 -5.415445103  
C -3.792481812 -0.422198105 -2.892303898  
H -5.472362821 -1.485909848 -3.804966205  
H -4.586192516 -0.425307915 -4.917057765  
O -2.365885084 -0.570294546 -3.142381373  
H -4.015130129 -0.905231007 -1.936268658  
H -3.999034836 0.647366797 -2.802852744  
H -1.327375774 -2.188421202 -3.902818161  
H -1.828936950 -0.971317581 -5.107989912

=====  
16  
=====

Mn -1.079457044 -0.726965092 -1.655553113  
C -1.414521633 -2.467010109 -1.512538530  
O -1.684063077 -3.599294246 -1.422328168  
N 0.412533460 -0.950952837 -0.289499305  
C 0.194018020 -0.403738474 1.012634769  
C -1.143133535 -0.134775715 1.400963023  
C -1.369757665 0.201782291 2.755507013  
C -0.324179997 0.342427720 3.659173415  
C 1.002628358 0.186242839 3.232979592  
C 1.249079802 -0.181178329 1.915846880  
H 2.274587474 -0.268865310 1.569672848  
H 1.829751500 0.363750669 3.913733518  
H -0.537973341 0.609167462 4.691225753  
H -2.395158269 0.357226014 3.078513511  
S -2.450275045 -0.208243276 0.246741180  
C 1.425600691 -1.779822481 -0.376383525  
C 1.876679638 -2.561647226 -1.518551268  
C 1.519719493 -2.374044081 -2.875018779  
C 1.977176214 -3.242458626 -3.864841144  
C 2.806446916 -4.318193268 -3.541710644  
C 3.204941760 -4.498864516 -2.216174280  
C 2.753734577 -3.630070714 -1.229532163  
H 3.061071175 -3.785170092 -0.198293765  
H 3.864233636 -5.320005019 -1.949913379  
H 3.146036912 -4.996270428 -4.318859702  
H 1.685286142 -3.063817764 -4.895539825  
S 0.538823442 -0.964787065 -3.377833927  
C 1.814823555 0.345072046 -3.103574023  
H 1.499332058 1.239629272 -3.640716683  
H 1.883672334 0.561417592 -2.036359072  
H 2.768426111 -0.004546580 -3.503005457  
H 1.955333799 -2.028915602 0.541889933  
H -1.403512090 1.051683133 -4.047539419  
C 0.392198682 5.220858236 -4.008311882  
C -0.459776997 5.692271894 -5.010998645



|       |              |              |              |     |           |           |           |
|-------|--------------|--------------|--------------|-----|-----------|-----------|-----------|
| C     | -1.507917921 | 4.887542291  | -5.467270013 | H12 | -1.518742 | 3.829021  | -2.293987 |
| H     | -0.299732575 | 6.675094086  | -5.444856438 | S13 | -0.489841 | 2.545676  | 0.004232  |
| H     | 1.224425998  | 5.830708366  | -3.667765178 | B14 | 0.680917  | 4.001187  | 0.136065  |
| C     | 0.183942147  | 3.961959059  | -3.449448804 | O15 | 0.944456  | 4.926539  | -0.833256 |
| H     | 0.855554364  | 3.584307590  | -2.685638511 | C16 | 0.851500  | 6.232535  | -0.185855 |
| C     | -0.882702109 | 3.159072124  | -3.882565105 | C17 | 1.068965  | 5.902835  | 1.353941  |
| H     | -2.165982885 | 5.246128594  | -6.253656503 | O18 | 0.767750  | 4.477510  | 1.424777  |
| C     | -1.706578773 | 3.621611922  | -4.919964965 | C19 | 0.098005  | 6.616045  | 2.296266  |
| H     | -2.516548828 | 2.991329017  | -5.280118404 | H20 | -0.940951 | 6.373816  | 2.067467  |
| C     | -1.097311282 | 1.811063365  | -3.324117619 | H21 | 0.299056  | 6.305760  | 3.326314  |
| N     | -0.927076974 | 1.426014916  | -2.109177518 | H22 | 0.227989  | 7.701636  | 2.238616  |
| C     | 0.144395285  | 3.744762415  | 0.564862254  | C23 | 2.501196  | 6.108517  | 1.846194  |
| C     | -1.391730212 | 4.094710861  | 0.375695616  | H24 | 2.582900  | 5.732688  | 2.870649  |
| O     | -1.742406447 | 3.373007677  | -0.836671287 | H25 | 3.222561  | 5.576687  | 1.229473  |
| C     | -1.680616161 | 5.576591371  | 0.139838387  | H26 | 2.766656  | 7.170134  | 1.853548  |
| C     | -2.289396774 | 3.548007418  | 1.488203186  | C27 | 1.897728  | 7.163380  | -0.792514 |
| O     | 0.302651306  | 2.519841378  | -0.218254503 | H28 | 1.830008  | 8.157960  | -0.338283 |
| C     | 1.094876247  | 4.785320612  | -0.040421421 | H29 | 2.910761  | 6.788220  | -0.654987 |
| C     | 0.555596728  | 3.454255134  | 2.002665283  | H30 | 1.712163  | 7.264623  | -1.865687 |
| B     | -0.786049186 | 2.417543037  | -1.035590780 | C31 | -0.556785 | 6.752415  | -0.507555 |
| H     | 0.815309255  | 5.049669405  | -1.061162289 | H32 | -1.325702 | 6.074222  | -0.126378 |
| H     | 1.107466572  | 5.700733425  | 0.558212090  | H33 | -0.728882 | 7.748895  | -0.090052 |
| H     | 2.106624258  | 4.369606037  | -0.056509303 | H34 | -0.667525 | 6.807079  | -1.593986 |
| H     | 1.615601892  | 3.187588902  | 2.035054008  | C35 | 0.937441  | -1.307756 | -1.530264 |
| H     | 0.405162549  | 4.341993725  | 2.626935112  | C36 | 1.960465  | -2.239643 | -1.183478 |
| H     | -0.008316864 | 2.623744434  | 2.421454783  | C37 | 3.015810  | -2.156318 | -0.210911 |
| H     | -2.756854543 | 5.720632240  | 0.008863140  | C38 | 4.039166  | -3.113840 | -0.173373 |
| H     | -1.358326985 | 6.175062744  | 0.998416282  | C39 | 4.052631  | -4.209699 | -1.027473 |
| H     | -1.180447741 | 5.947544555  | -0.756776277 | C40 | 2.990062  | -4.361541 | -1.936493 |
| H     | -2.133535842 | 2.477688833  | 1.625832245  | C41 | 1.988176  | -3.417503 | -2.000795 |
| H     | -2.109216188 | 4.065186943  | 2.435391350  | H42 | 1.196464  | -3.537007 | -2.736620 |
| H     | -3.333779158 | 3.697965443  | 1.201086869  | H43 | 2.961984  | -5.217516 | -2.605774 |
| C     | -4.680659115 | 0.228578508  | -3.998761771 | H44 | 4.859142  | -4.934626 | -0.981573 |
| C     | -4.387483210 | -1.158040721 | -4.605266877 | H45 | 4.831483  | -2.990668 | 0.560217  |
| C     | -2.964552264 | -1.474075725 | -4.103304311 | S46 | 3.055324  | -0.975984 | 1.131694  |
| H     | -5.098614837 | -1.893223712 | -4.214546098 | C47 | 2.155149  | -1.931533 | 2.422595  |
| H     | -4.455612168 | -1.174705228 | -5.696437518 | H48 | 1.821184  | -1.224689 | 3.183234  |
| C     | -3.923013693 | 0.151657351  | -2.678596218 | H49 | 1.286104  | -2.413079 | 1.972035  |
| H     | -5.748506840 | 0.423192819  | -3.867160872 | H50 | 2.819337  | -2.682510 | 2.853934  |
| H     | -4.259565327 | 1.025027864  | -4.624506088 | H51 | 0.227769  | -1.707684 | -2.254547 |
| O     | -2.702019317 | -0.530984490 | -3.036034245 | H52 | 3.377704  | 3.146177  | 1.761022  |
| H     | -4.461072526 | -0.437146246 | -1.924858607 | C53 | 0.820494  | 2.777316  | 4.655706  |
| H     | -3.634274028 | 1.106542145  | -2.238415362 | C54 | 2.345527  | 2.762885  | 4.431113  |
| H     | -2.864935185 | -2.489836842 | -3.710306450 | C55 | 2.539410  | 1.423681  | 3.731252  |
| H     | -2.191306436 | -1.316380120 | -4.862135005 | H56 | 2.920456  | 2.845847  | 5.357929  |
| ===== |              |              |              | H57 | 2.639707  | 3.573030  | 3.756928  |
| 7-TS  |              |              |              | C58 | 0.272661  | 1.987945  | 3.447675  |
| ===== |              |              |              | H59 | 0.565932  | 2.276250  | 5.598077  |
| Mn1   | 1.530776     | 0.994120     | 0.502949     | H60 | 0.411482  | 3.792817  | 4.689458  |
| N2    | 0.780345     | -0.002171    | -1.197371    | O61 | 1.419367  | 1.340686  | 2.823419  |
| C3    | 0.065014     | 0.794580     | -2.103874    | H62 | -0.450304 | 1.214616  | 3.734756  |
| C4    | -0.496350    | 2.039421     | -1.716950    | H63 | -0.170406 | 2.643123  | 2.698887  |
| C5    | -1.119902    | 2.880379     | -2.639149    | H64 | 2.495797  | 0.588495  | 4.447244  |
| C6    | -1.225499    | 2.515503     | -3.978508    | H65 | 3.449960  | 1.336821  | 3.137935  |
| C7    | -0.699194    | 1.287150     | -4.381514    | C66 | -0.550382 | -0.518273 | 1.263696  |
| C8    | -0.066804    | 0.452354     | -3.469957    | O67 | -1.633630 | -0.827869 | 1.008522  |
| H9    | 0.402988     | -0.454562    | -3.829926    | C68 | 3.877356  | 2.766150  | 0.859699  |
| H10   | -0.755724    | 0.984997     | -5.424206    | H69 | 4.458481  | 1.880259  | 1.172770  |
| H11   | -1.707041    | 3.178390     | -4.691009    | C70 | 6.745696  | 5.806543  | -0.312291 |

C71 5.527182 5.697359 -0.984537  
H72 5.291954 6.375367 -1.801643  
C73 4.604448 4.717052 -0.615479  
C74 7.032157 4.924443 0.731738  
H75 7.467206 6.566247 -0.601040  
H76 7.980935 4.993993 1.258382  
C77 6.108506 3.942754 1.093144  
H78 3.652583 4.636068 -1.131434  
C79 4.884737 3.824817 0.425896  
H80 6.346534 3.246917 1.896090  
N81 2.847053 2.438962 -0.122717  
B82 3.370393 2.095336 -1.404466  
C83 3.637671 2.044138 -3.672809  
C84 4.793099 1.231978 -2.979415  
O85 2.674295 2.182718 -2.603636  
C86 4.066031 3.462187 -4.081535  
C87 2.979484 1.342925 -4.856959  
O88 4.679242 1.656530 -1.604566  
C89 6.199419 1.557764 -3.477081  
C90 4.548661 -0.282209 -3.008891  
H91 6.929943 0.943430 -2.941574  
H92 6.293527 1.345309 -4.547990  
H93 6.448796 2.605893 -3.300972  
H94 3.535315 -0.519231 -2.676258  
H95 4.695888 -0.698377 -4.010688  
H96 5.247063 -0.771020 -2.324085  
H97 4.578776 3.968768 -3.260455  
H98 4.730389 3.449679 -4.951832  
H99 3.170234 4.037783 -4.332670  
H100 2.153533 1.954440 -5.230576  
H101 3.703127 1.197627 -5.666819  
H102 2.570164 0.373735 -4.572240

=====  
7  
=====

Mn1 1.967688 1.009179 0.264827  
N2 0.910139 0.542188 -1.498346  
C3 0.486741 1.655360 -2.236658  
C4 0.003740 2.824351 -1.588926  
C5 -0.439473 3.934913 -2.305693  
C6 -0.380006 3.941976 -3.699517  
C7 0.129477 2.824343 -4.364760  
C8 0.551440 1.708860 -3.650761  
H9 0.985004 0.870169 -4.181580  
H10 0.210716 2.822841 -5.448558  
H11 -0.720385 4.812786 -4.251658  
H12 -0.809913 4.801065 -1.771531  
S13 -0.027222 2.778578 0.211099  
B14 0.429267 4.446600 0.807157  
O15 0.286938 5.617370 0.136015  
C16 0.780019 6.676151 1.026321  
C17 0.668995 5.992984 2.441488  
O18 0.819641 4.571535 2.114700  
C19 -0.715104 6.141678 3.082154  
H20 -1.506798 5.861375 2.381280  
H21 -0.779985 5.480556 3.950940  
H22 -0.892963 7.168588 3.414286  
C23 1.765993 6.377522 3.426437  
H24 1.613184 5.854587 4.375030

H25 2.754215 6.115962 3.045261  
H26 1.740713 7.454279 3.623587  
C27 2.216785 6.981033 0.607375  
H28 2.616107 7.831631 1.168264  
H29 2.870774 6.121650 0.756246  
H30 2.240811 7.217788 -0.458085  
C31 -0.110115 7.898792 0.832323  
H32 -1.167082 7.655366 0.954194  
H33 0.156030 8.682087 1.549789  
H34 0.033732 8.297355 -0.175493  
C35 0.796403 -0.655889 -2.129027  
C36 1.364227 -1.937511 -1.871994  
C37 2.198818 -2.415319 -0.803059  
C38 2.720031 -3.715216 -0.825996  
C39 2.425603 -4.617214 -1.842683  
C40 1.578499 -4.194070 -2.882211  
C41 1.074769 -2.911677 -2.887652  
H42 0.437675 -2.601177 -3.712518  
H43 1.325226 -4.871668 -3.693581  
H44 2.846094 -5.617774 -1.832338  
H45 3.378240 -4.017585 -0.015655  
S46 2.629423 -1.465695 0.651387  
C47 1.552761 -2.242822 1.923221  
H48 1.487665 -1.533517 2.750943  
H49 0.556078 -2.429755 1.521795  
H50 1.995253 -3.182055 2.261545  
H51 0.147220 -0.656933 -3.004335  
H52 3.483811 3.575779 1.315564  
C53 1.205124 2.329310 4.496068  
C54 2.673245 2.546682 4.073319  
C55 2.977507 1.276245 3.286780  
H56 3.348721 2.693465 4.920942  
H57 2.735566 3.410684 3.407963  
C58 0.636956 1.408334 3.392006  
H59 1.146909 1.840778 5.474046  
H60 0.654020 3.271131 4.548711  
O61 1.756049 1.040006 2.547235  
H62 0.187805 0.494125 3.797782  
H63 -0.095954 1.903243 2.754708  
H64 3.167743 0.419154 3.950073  
H65 3.775676 1.355323 2.546955  
C66 -0.749698 -0.313840 0.862594  
O67 -1.616550 -0.753907 0.258006  
C68 4.188108 3.215288 0.549132  
H69 5.177710 3.193714 1.034466  
C70 4.193983 6.242504 -2.556981  
C71 3.236415 5.224834 -2.560973  
H72 2.467625 5.189749 -3.328406  
C73 3.258270 4.242478 -1.572457  
C74 5.168831 6.264512 -1.557241  
H75 4.185723 7.007217 -3.329647  
H76 5.925252 7.045737 -1.552091  
C77 5.181505 5.278871 -0.567876  
H78 2.528155 3.443010 -1.588080  
C79 4.224354 4.259489 -0.560459  
H80 5.947740 5.296778 0.204824  
N81 3.770110 1.893459 0.112545  
B82 4.551917 1.246266 -0.854109  
C83 4.915800 -0.181010 -2.603108

C84 6.204784 0.683080 -2.333247  
O85 4.186339 -0.006848 -1.370372  
C86 4.040295 0.385648 -3.729958  
C87 5.160200 -1.670418 -2.828506  
O88 5.707165 1.725271 -1.464612  
C89 6.811048 1.334756 -3.573762  
C90 7.275901 -0.088350 -1.551370  
H91 7.693728 1.916469 -3.290480  
H92 7.118099 0.576400 -4.302738  
H93 6.100486 2.014054 -4.048409  
H94 6.836455 -0.567542 -0.671550  
H95 7.756535 -0.856193 -2.166031  
H96 8.040653 0.616073 -1.211411  
H97 3.836651 1.449122 -3.572214  
H98 4.504700 0.255509 -4.712800  
H99 3.086500 -0.147228 -3.717578  
H100 4.206325 -2.180126 -2.988472  
H101 5.792225 -1.828365 -3.709551  
H102 5.640647 -2.130149 -1.963022

=====  
37  
=====

Mn 1.806398420 0.974764260 0.303164440  
N 0.951970538 0.584706092 -1.444446841  
C 0.513234131 1.703677363 -2.183974192  
C -0.047960533 2.829559351 -1.533919414  
C -0.532898591 3.928280337 -2.239150521  
C -0.425214988 3.968031825 -3.629886477  
C 0.177906182 2.899565219 -4.294331176  
C 0.639096679 1.792520200 -3.588823387  
H 1.146455010 0.997832946 -4.121339294  
H 0.305572086 2.930199503 -5.373233747  
H -0.794434571 4.829377274 -4.178435039  
H -0.964977613 4.761477634 -1.699063132  
S -0.088366988 2.747147443 0.258782357  
B 0.424325232 4.404577107 0.850469529  
O 0.313398903 5.564861005 0.155627572  
C 0.834703108 6.630585308 1.020537960  
C 0.720978696 5.977969682 2.452317150  
O 0.813803497 4.545112900 2.155475719  
C -0.645357972 6.190904209 3.111455126  
H -1.457460642 5.915846348 2.432180911  
H -0.716634643 5.557242867 4.000007304  
H -0.784035633 7.232203548 3.416238898  
C 1.847959490 6.338077183 3.412741559  
H 1.697327087 5.825781410 4.367435254  
H 2.819989464 6.042413826 3.015476066  
H 1.860150882 7.416389905 3.601917124  
C 2.273739675 6.900794473 0.586541613  
H 2.693780230 7.753000327 1.129463664  
H 2.911658304 6.032717161 0.746347058  
H 2.296422503 7.116573837 -0.483729822  
C -0.031449432 7.867143936 0.807975075  
H -1.091856729 7.650721736 0.949156624  
H 0.261539206 8.662123567 1.501695799  
H 0.108315759 8.236894790 -0.211387597  
C 0.898914517 -0.593584828 -2.127256592  
C 1.460622450 -1.874088486 -1.875345432  
C 2.217922920 -2.342053547 -0.754065639

C 2.764850715 -3.628038637 -0.736885040  
C 2.567468281 -4.523732323 -1.783880677  
C 1.797500558 -4.107735530 -2.884439784  
C 1.267127544 -2.835133206 -2.922106541  
H 0.689680257 -2.526756667 -3.790722247  
H 1.625170513 -4.784100144 -3.717760326  
H 3.006514060 -5.515826997 -1.751155208  
H 3.364411332 -3.925214537 0.119902717  
S 2.504195196 -1.343426531 0.694684957  
C 1.414434807 -2.182052224 1.912706647  
H 1.293016261 -1.490345407 2.748257631  
H 0.446152975 -2.403338647 1.463591808  
H 1.883916042 -3.108332140 2.249303494  
H 0.306784261 -0.566961724 -3.039033903  
H 3.368069164 3.577214250 1.271478235  
C 1.298699041 2.303925483 4.518227578  
C 2.756641797 2.512126595 4.057436615  
C 3.030023880 1.245865002 3.253521618  
H 3.456546469 2.654031692 4.885698982  
H 2.803534899 3.377222107 3.393132917  
C 0.693227604 1.406461959 3.415553849  
H 1.260169479 1.800591963 5.489836894  
H 0.759566684 3.250616505 4.599872100  
O 1.788977426 1.030659567 2.544413063  
H 0.238068744 0.493976111 3.818630293  
H -0.046076941 1.919366251 2.801502867  
H 3.227231271 0.380946617 3.904705289  
H 3.806273111 1.322723495 2.491258417  
C -0.928930870 -0.322326696 0.806956844  
O -1.616668357 -0.776667964 0.023302494  
C 4.046690485 3.181566403 0.500062836  
H 5.040316267 3.143913470 0.977705428  
C 4.173770089 6.149063084 -2.658583211  
C 3.180646543 5.165895949 -2.650551923  
H 2.418470807 5.142393074 -3.425068141  
C 3.159721836 4.202789990 -1.642745494  
C 5.142378619 6.154967794 -1.652038101  
H 4.199790004 6.898082097 -3.446266445  
H 5.928421603 6.906572200 -1.657288650  
C 5.112349400 5.188438779 -0.644974169  
H 2.407668846 3.424979622 -1.649844514  
C 4.117017895 4.206384352 -0.623726258  
H 5.877986316 5.189625927 0.128644431  
N 3.603659040 1.857548111 0.089848738  
B 4.414051436 1.220163974 -0.866239793  
C 4.886182681 -0.173321871 -2.613139191  
C 6.145063830 0.710474461 -2.278782659  
O 4.102440072 -0.031128749 -1.412186601  
C 4.049535640 0.394452551 -3.769982642  
C 5.168995420 -1.654336502 -2.847712782  
O 5.585951559 1.731607810 -1.424100974  
C 6.796070485 1.388033146 -3.482536189  
C 7.194443054 -0.048382422 -1.456245905  
H 7.656601520 1.978658243 -3.152897655  
H 7.147203097 0.644647652 -4.207217025  
H 6.097359938 2.063802653 -3.979241238  
H 6.724291794 -0.548196465 -0.604288848  
H 7.719953939 -0.797869154 -2.056751757  
H 7.927038834 0.667492503 -1.072201231

H 3.826507194 1.453401616 -3.607685179  
H 4.556899645 0.282884720 -4.733801191  
H 3.103006750 -0.151338264 -3.805407716  
H 4.233351294 -2.180086406 -3.054961858  
H 5.841061887 -1.788018815 -3.702946406  
H 5.621298759 -2.116364338 -1.968479664

17

Mn 1.311748072 0.747833155 0.356036658  
N 0.894451284 0.488708153 -1.579616684  
C 0.601244098 1.662060634 -2.341818336  
C 0.043388953 2.793608360 -1.715191766  
C -0.312825815 3.917345311 -2.462947240  
C -0.038679668 3.964136280 -3.829448417  
C 0.599417161 2.888187581 -4.446001739  
C 0.914325775 1.750375558 -3.708543949  
H 1.459630961 0.942281016 -4.178550264  
H 0.869228929 2.936494178 -5.497031527  
H -0.295221342 4.853255730 -4.398221536  
H -0.758000525 4.769991252 -1.966970234  
S -0.104792816 2.702540263 0.069400472  
B 0.337094352 4.399096507 0.647095501  
O -0.070433151 5.556331214 0.061729271  
C 0.509387972 6.667363066 0.821340400  
C 0.922169562 5.976526526 2.188642152  
O 0.974277653 4.557310619 1.842152345  
C -0.131515786 6.103011755 3.291488509  
H -1.109614793 5.759742250 2.943411805  
H 0.164103859 5.476293200 4.137776700  
H -0.225238604 7.134971485 3.641094759  
C 2.301471305 6.372168764 2.708801286  
H 2.518467411 5.815441271 3.625416126  
H 3.080537127 6.146605759 1.978602184  
H 2.334214192 7.441268099 2.942657697  
C 1.691556057 7.184643597 0.003620540  
H 2.163414196 8.043947029 0.489427958  
H 2.440190602 6.409904130 -0.147994455  
H 1.334421363 7.497220337 -0.981052933  
C -0.560212455 7.748102530 0.951802451  
H -1.478445845 7.363802279 1.398963781  
H -0.191375705 8.578409882 1.562922573  
H -0.802872546 8.138994375 -0.040027500  
C 0.834008676 -0.627235769 -2.249715830  
C 1.311266866 -1.957646354 -1.904676450  
C 2.098661755 -2.352864194 -0.794557479  
C 2.579255385 -3.664417034 -0.714600621  
C 2.270404768 -4.614581659 -1.683533268  
C 1.482214278 -4.248241015 -2.776806777  
C 1.025998761 -2.943528684 -2.879516825  
H 0.433065883 -2.655517467 -3.744187617  
H 1.237572826 -4.971426083 -3.549064505  
H 2.652615627 -5.626996528 -1.591588819  
H 3.216207003 -3.941955293 0.119707012  
S 2.590522238 -1.219368305 0.502073840  
C 1.923690367 -2.134585944 1.952550253  
H 1.920892197 -1.415411627 2.772301191  
H 0.900381565 -2.455524019 1.757122388  
H 2.559035080 -2.986843358 2.199888092

H 0.395803511 -0.588712835 -3.247385675  
H 2.808646548 3.271723222 1.168011218  
C 1.792750241 2.294299983 4.529910125  
C 3.211947801 2.328202638 3.926680984  
C 3.180461449 1.119021613 2.998244842  
H 4.000215292 2.263687425 4.682461596  
H 3.358177751 3.239185767 3.339809048  
C 0.931913920 1.703537742 3.393937593  
H 1.768947795 1.647132430 5.413332208  
H 1.439438503 3.284952117 4.829827361  
O 1.859843229 1.161790128 2.426261512  
H 0.263612728 0.902229729 3.729268103  
H 0.345849053 2.466708567 2.883035752  
H 3.307637682 0.182771932 3.564941788  
H 3.879724947 1.131417936 2.164407320  
C -0.143393131 -0.164427532 0.847953187  
O -1.076759555 -0.814559704 1.130702329  
C 3.551007802 2.944398049 0.434554680  
H 4.482005318 2.779152109 1.008780433  
C 4.425291323 6.321685640 -2.160085744  
C 3.501561830 5.352393128 -2.556232666  
H 2.997736758 5.436044895 -3.516269939  
C 3.219198254 4.265657498 -1.727822019  
C 5.062842202 6.192219989 -0.923605873  
H 4.652458746 7.164469521 -2.808050483  
H 5.793418748 6.933222359 -0.607154285  
C 4.772937026 5.104457711 -0.097907677  
H 2.530438175 3.495159124 -2.049231946  
C 3.846654683 4.125697358 -0.484922254  
H 5.292473003 4.995609746 0.852956130  
N 3.075233370 1.735641399 -0.217101303  
B 3.986775164 1.192156134 -1.116609662  
C 4.852317454 -0.065910125 -2.843989835  
C 6.007263702 0.704715038 -2.103981201  
O 3.762690024 0.049272198 -1.915734113  
C 4.427169777 0.631705111 -4.145111819  
C 5.114413125 -1.547796632 -3.104667732  
O 5.283896264 1.688534466 -1.352793599  
C 7.002408516 1.418340379 -3.018477129  
C 6.753637349 -0.185427880 -1.098297542  
H 7.764897350 1.918000726 -2.412674012  
H 7.505707121 0.709080022 -3.685581628  
H 6.505526551 2.180914370 -3.621422207  
H 6.043348308 -0.707714970 -0.450067144  
H 7.389278865 -0.925977849 -1.595056263  
H 7.384532880 0.450231255 -0.470127414  
H 4.193087892 1.683397373 -3.956581111  
H 5.202181862 0.573501872 -4.916062593  
H 3.527810037 0.141758242 -4.530284984  
H 4.240083585 -1.994411390 -3.588150619  
H 5.980885368 -1.684523277 -3.761189849  
H 5.287323587 -2.089607749 -2.173254782

8

Mn1 1.127143 1.014059 0.580701  
N2 0.728641 0.065940 -1.218888  
C3 -0.118542 0.819358 -2.067323  
C4 -0.914394 1.871856 -1.534513

C5 -1.711061 2.625232 -2.407786  
C6 -1.738302 2.373146 -3.777997  
C7 -0.947818 1.351772 -4.305442  
C8 -0.147801 0.592632 -3.457279  
H9 0.509639 -0.162666 -3.877610  
H10 -0.936575 1.156354 -5.374622  
H11 -2.368969 2.974985 -4.427092  
H12 -2.325014 3.417883 -1.991052  
S13 -0.934492 2.250666 0.207328  
B14 1.939688 3.987057 -0.034902  
O15 1.560925 4.793685 -1.063639  
C16 0.881407 5.953930 -0.519541  
C17 1.180035 5.858208 1.045184  
O18 1.686422 4.506492 1.213402  
C19 -0.055518 6.010265 1.930393  
H20 -0.811716 5.262900 1.684755  
H21 0.230834 5.882006 2.979113  
H22 -0.494513 7.006872 1.819740  
C23 2.299020 6.787223 1.529598  
H24 2.504934 6.573867 2.582874  
H25 3.223341 6.615893 0.972394  
H26 2.018730 7.840592 1.439969  
C27 1.476335 7.187810 -1.201465  
H28 1.025548 8.106032 -0.811161  
H29 2.558346 7.244939 -1.065132  
H30 1.273552 7.136282 -2.274802  
C31 -0.597710 5.817089 -0.886932  
H32 -1.021233 4.906126 -0.461331  
H33 -1.174085 6.683554 -0.547721  
H34 -0.680704 5.745057 -1.974594  
C35 0.956055 -1.214774 -1.586207  
C36 2.012639 -2.097767 -1.223403  
C37 3.046528 -1.945707 -0.237792  
C38 4.126800 -2.839689 -0.181494  
C39 4.213758 -3.939361 -1.025346  
C40 3.171129 -4.160888 -1.945829  
C41 2.118258 -3.276677 -2.031750  
H42 1.342888 -3.446314 -2.775110  
H43 3.200491 -5.023772 -2.606134  
H44 5.060192 -4.616060 -0.963777  
H45 4.903328 -2.664287 0.558818  
S46 2.993252 -0.755563 1.092729  
C47 2.304313 -1.806855 2.439186  
H48 1.966601 -1.148380 3.240360  
H49 1.457135 -2.375981 2.054848  
H50 3.077508 -2.486308 2.801723  
H51 0.272460 -1.631125 -2.327192  
H52 3.397778 2.904780 1.796979  
C53 0.868765 3.094408 4.649402  
C54 2.383288 2.874583 4.495182  
C55 2.410044 1.522022 3.791610  
H56 2.923353 2.867660 5.446079  
H57 2.813238 3.644375 3.845651  
C58 0.306024 2.511466 3.345580  
H59 0.492344 2.547555 5.521076  
H60 0.599454 4.147111 4.768671  
O61 1.332732 1.599377 2.832451  
H62 -0.619033 1.943510 3.476767  
H63 0.162708 3.274107 2.582437

H64 2.215143 0.705597 4.502777  
H65 3.331072 1.301516 3.248882  
C66 -0.533162 -0.715109 1.301093  
O67 -1.436253 -1.379118 1.098414  
C68 3.830042 2.674503 0.823912  
H69 4.192288 1.645850 0.853002  
C70 7.259162 5.263844 0.254810  
C71 6.092481 5.504477 -0.469586  
H72 6.045738 6.335527 -1.168651  
C73 4.976821 4.678429 -0.308560  
C74 7.305247 4.185076 1.141117  
H75 8.126896 5.905016 0.126922  
H76 8.212181 3.980864 1.704283  
C77 6.192813 3.360222 1.296562  
H78 4.086013 4.879677 -0.894685  
C79 5.014050 3.596480 0.578624  
H80 6.240561 2.512409 1.977584  
N81 2.739766 2.769580 -0.181584  
B82 3.153960 2.323622 -1.510525  
C83 3.539254 2.410094 -3.732629  
C84 4.412463 1.266321 -3.083092  
O85 2.575912 2.708762 -2.683212  
C86 4.324659 3.706082 -3.975717  
C87 2.774397 2.007388 -4.988359  
O88 4.269295 1.538178 -1.657899  
C89 5.898753 1.322190 -3.424787  
C90 3.855454 -0.132800 -3.338989  
H91 6.418713 0.497907 -2.927903  
H92 6.048477 1.219324 -4.504895  
H93 6.353167 2.257514 -3.093125  
H94 2.795680 -0.177668 -3.089900  
H95 3.988188 -0.426349 -4.384686  
H96 4.375312 -0.853795 -2.703336  
H97 4.890500 3.999661 -3.087135  
H98 5.020482 3.602573 -4.814148  
H99 3.614566 4.505294 -4.205083  
H100 2.220309 2.870434 -5.368825  
H101 3.463535 1.666781 -5.768503  
H102 2.047396 1.224064 -4.773390

=====  
38  
=====

Mn 0.987421374 0.792714829 0.717401653  
N 0.663594826 0.049428478 -1.083036444  
C -0.148886797 0.811257968 -1.964380648  
C -0.952940243 1.835888899 -1.419511793  
C -1.776234421 2.594744305 -2.258026293  
C -1.788385781 2.378367700 -3.635678857  
C -0.967662072 1.392403088 -4.185246173  
C -0.158294341 0.617239925 -3.358202131  
H 0.499444147 -0.120818171 -3.803861987  
H -0.943315237 1.232438390 -5.259980989  
H -2.423404929 2.985525021 -4.275330573  
H -2.404642158 3.363873678 -1.819333963  
S -0.864110517 2.123049263 0.319645328  
B 2.010406096 4.050266967 -0.109424749  
O 1.606873251 4.876958012 -1.121543742  
C 0.861575804 5.975495445 -0.541051886  
C 1.279249148 5.915032107 0.987914852

O 1.723115171 4.541820119 1.151483928  
 C 0.137541940 6.174516336 1.967832366  
 H -0.685915911 5.474523568 1.817822362  
 H 0.502899679 6.065208531 2.994203465  
 H -0.246139635 7.193483452 1.852084466  
 C 2.485089133 6.796242059 1.335778207  
 H 2.795284142 6.581869242 2.362889556  
 H 3.334665512 6.578080442 0.683879239  
 H 2.244768348 7.860728597 1.261395574  
 C 1.283524270 7.254483679 -1.263580512  
 H 0.796401749 8.129904283 -0.821006790  
 H 2.364995320 7.400071149 -1.229440028  
 H 0.984231345 7.191133069 -2.313574010  
 C -0.622516142 5.698632718 -0.789391632  
 H -0.933118008 4.775184819 -0.297907903  
 H -1.247561079 6.526167005 -0.439169721  
 H -0.777572569 5.569821982 -1.863740697  
 C 0.990345982 -1.188384301 -1.539670418  
 C 2.074654055 -2.040140951 -1.206869576  
 C 3.066212566 -1.857488401 -0.193967086  
 C 4.192740518 -2.685043829 -0.114798952  
 C 4.363559187 -3.756214600 -0.984463998  
 C 3.368823773 -4.004135638 -1.950762726  
 C 2.269714364 -3.178561449 -2.053405947  
 H 1.530829257 -3.365707987 -2.829004210  
 H 3.473112440 -4.842832626 -2.634251695  
 H 5.242217828 -4.389395405 -0.912560453  
 H 4.935988457 -2.485089996 0.653253510  
 S 2.859098492 -0.665954877 1.111875555  
 C 2.321611725 -1.808690097 2.453583809  
 H 1.935358117 -1.214041607 3.280581979  
 H 1.532928000 -2.457136193 2.070799071  
 H 3.176366438 -2.405315123 2.776169371  
 H 0.367288821 -1.569894454 -2.345999031  
 H 3.418733893 2.910157980 1.714343992  
 C 0.752622633 3.074208642 4.524456009  
 C 2.260831191 2.830643062 4.359347853  
 C 2.260428524 1.485190214 3.645743269  
 H 2.807990735 2.802944043 5.305676750  
 H 2.697384827 3.599018171 3.712919814  
 C 0.187156951 2.552162372 3.201482849  
 H 0.364772355 2.504516553 5.376601449  
 H 0.502402161 4.127540620 4.676364087  
 O 1.170995064 1.582362819 2.694584017  
 H -0.770336525 2.034816991 3.293797256  
 H 0.119387297 3.333262930 2.448139146  
 H 2.055615266 0.667415378 4.350449893  
 H 3.170421641 1.258823269 3.090110391  
 C -0.623581793 -0.945963486 1.378156046  
 O -1.531523152 -1.564732634 1.075701587  
 C 3.870608675 2.694172476 0.745559026  
 H 4.195477865 1.651920184 0.753540794  
 C 7.411896678 5.171304009 0.391685671  
 C 6.296872224 5.450506012 -0.397677887  
 H 6.317762081 6.283652908 -1.095575774  
 C 5.147616397 4.661307464 -0.302468837  
 C 7.371211690 4.092248225 1.278232059  
 H 8.306290062 5.783529110 0.315068981  
 H 8.236688708 3.859500231 1.893411589

C 6.224717101 3.305054169 1.368177343  
 H 4.293369065 4.890828661 -0.931734556  
 C 5.098585301 3.578145378 0.582354205  
 H 6.203791951 2.457144232 2.050843530  
 N 2.839520611 2.881953059 -0.289996662  
 B 3.205477056 2.393814891 -1.599122612  
 C 3.575945777 2.446728541 -3.824820115  
 C 4.422629469 1.285113452 -3.175612583  
 O 2.615937826 2.759558580 -2.780070253  
 C 4.394062423 3.724653838 -4.061088491  
 C 2.817578901 2.065258759 -5.091400979  
 O 4.302019535 1.574873948 -1.755188014  
 C 5.905848208 1.290604554 -3.536414160  
 C 3.819391977 -0.098864583 -3.411046107  
 H 6.405279304 0.452457353 -3.041510622  
 H 6.040118382 1.177717158 -4.617727788  
 H 6.393538123 2.212420791 -3.214513342  
 H 2.760394710 -0.105781189 -3.151784369  
 H 3.933182467 -0.412123012 -4.453428088  
 H 4.321565312 -0.826600563 -2.769438313  
 H 4.963132400 3.999543809 -3.168454347  
 H 5.091158694 3.608599574 -4.896771124  
 H 3.704971875 4.542463204 -4.288993948  
 H 2.255388977 2.930543435 -5.454556724  
 H 3.514304635 1.750787074 -5.876216252  
 H 2.104813484 1.263224901 -4.901994054

18

Mn 0.867480576 0.603195944 0.792513226  
 N 0.615442958 0.005531822 -1.137586053  
 C -0.177093463 0.830277706 -1.986767019  
 C -0.943943466 1.857302238 -1.390288749  
 C -1.764249960 2.647572377 -2.222979408  
 C -1.790347125 2.466659818 -3.598103327  
 C -0.977574879 1.489857075 -4.192955750  
 C -0.179537033 0.687732916 -3.390442453  
 H 0.486458629 -0.026601588 -3.862163285  
 H -0.947754889 1.376061358 -5.272562802  
 H -2.422765003 3.100326799 -4.214347150  
 H -2.376827324 3.415801125 -1.761886929  
 S -0.850004704 2.129909528 0.329264883  
 B 1.980231779 4.041919165 -0.110384887  
 O 1.555173056 4.835820883 -1.141475837  
 C 0.851776055 5.971394033 -0.580957358  
 C 1.297833793 5.953455852 0.941393813  
 O 1.739060857 4.586294484 1.136803605  
 C 0.176683920 6.246704345 1.936806576  
 H -0.652394625 5.546039126 1.827552639  
 H 0.565018321 6.164857063 2.957096100  
 H -0.205191077 7.263966796 1.800598279  
 C 2.509063320 6.844949340 1.241628864  
 H 2.839025568 6.659192123 2.267974893  
 H 3.347014076 6.610227271 0.581866912  
 H 2.265092172 7.906636631 1.141666498  
 C 1.292940977 7.215241173 -1.352576754  
 H 0.833077236 8.116920813 -0.934227164  
 H 2.378083404 7.336325406 -1.336482215  
 H 0.978491011 7.123486217 -2.396119955

C -0.643764888 5.725183175 -0.789721435  
 H -0.962765470 4.820362355 -0.268987733  
 H -1.241051606 6.575490374 -0.445700662  
 H -0.825409871 5.575805642 -1.857117970  
 C 0.937412551 -1.169795450 -1.621260628  
 C 2.012350885 -2.070203558 -1.246922811  
 C 2.961596077 -1.912016944 -0.210388099  
 C 4.084468236 -2.745953490 -0.147750716  
 C 4.257301154 -3.795032063 -1.045581448  
 C 3.298846650 -4.007758740 -2.042696405  
 C 2.212423564 -3.152943783 -2.140343262  
 H 1.495891016 -3.292091911 -2.945800459  
 H 3.413233234 -4.822320777 -2.751466662  
 H 5.129438363 -4.437506021 -0.968651862  
 H 4.828403974 -2.569513483 0.623999098  
 S 2.798054437 -0.666640340 1.065605298  
 C 2.553810499 -1.829717120 2.474794119  
 H 2.416801018 -1.229992431 3.372776173  
 H 1.658465587 -2.425830568 2.297049839  
 H 3.431286098 -2.468030100 2.587186329  
 H 0.403008196 -1.508204739 -2.508384030  
 H 3.336746396 2.884383484 1.744989251  
 C 0.858053841 3.142133822 4.504117965  
 C 2.348617850 2.776140497 4.405643457  
 C 2.274280405 1.449651943 3.658436362  
 H 2.842078456 2.686992260 5.377751216  
 H 2.884807841 3.515892564 3.802452134  
 C 0.276561951 2.598006186 3.188698540  
 H 0.402756473 2.649567873 5.370182301  
 H 0.692429564 4.218388609 4.602071103  
 O 1.273428556 1.670650310 2.648860703  
 H -0.661137890 2.050816134 3.317513733  
 H 0.156461436 3.371020894 2.435749835  
 H 1.955407230 0.639566625 4.331442675  
 H 3.199201901 1.158271740 3.156986662  
 C -0.182739302 -0.647259245 1.413634530  
 O -0.891146216 -1.485836286 1.816105121  
 C 3.815919388 2.688040556 0.786964937  
 H 4.156796971 1.651343871 0.792953967  
 C 7.328153818 5.221745556 0.512928361  
 C 6.251166579 5.444755546 -0.344101007  
 H 6.292785465 6.249124499 -1.074314072  
 C 5.112437429 4.638044475 -0.272699382  
 C 7.257962047 4.181532265 1.443190278  
 H 8.214463378 5.847891560 0.456299038  
 H 8.092999911 3.993946894 2.113579480  
 C 6.121609706 3.376787908 1.508256452  
 H 4.285803369 4.828512710 -0.949872173  
 C 5.033047818 3.591990847 0.653587214  
 H 6.079324493 2.560744190 2.227766495  
 N 2.809786556 2.869790054 -0.272067532  
 B 3.200730218 2.376194063 -1.564674655  
 C 3.618530007 2.434603141 -3.783883009  
 C 4.470073870 1.286802301 -3.117443150  
 O 2.626707108 2.719743378 -2.763972397  
 C 4.419964456 3.727835020 -3.994709701  
 C 2.901821886 2.049455280 -5.073850163  
 O 4.312204809 1.568247885 -1.702028286  
 C 5.960697431 1.316247338 -3.447152229

C 3.893624902 -0.106474296 -3.370699781  
 H 6.465271955 0.486260944 -2.943419224  
 H 6.120898753 1.209835341 -4.525664461  
 H 6.424881964 2.245353123 -3.111886689  
 H 2.825991748 -0.122036255 -3.148242524  
 H 4.044313445 -0.422226478 -4.407488241  
 H 4.384582969 -0.824734259 -2.709621404  
 H 4.968391929 4.004766025 -3.090291183  
 H 5.134354046 3.630595179 -4.818116625  
 H 3.721376338 4.535871091 -4.228200755  
 H 2.329013843 2.906019894 -5.440661210  
 H 3.624968916 1.760694414 -5.844472857  
 H 2.202638203 1.228842976 -4.914770954

=====  
 11  
 =====

Mn -0.877034966 0.194203656 -0.881650217  
 C -1.900003173 1.217275471 -2.303603515  
 O -2.544797162 1.794021933 -3.071152613  
 N 1.131557387 -0.396731541 -0.709219026  
 C 1.971678038 0.635218815 -0.206666845  
 C 1.389155238 1.736773916 0.472475006  
 C 2.250111110 2.757360504 0.911828547  
 C 3.625133700 2.693778420 0.701645384  
 C 4.188046959 1.601500249 0.034660370  
 C 3.358808251 0.577853404 -0.414987772  
 H 3.772412363 -0.259860684 -0.970199311  
 H 5.257246534 1.555460910 -0.149246278  
 H 4.258568003 3.503912120 1.052834013  
 H 1.816352187 3.606139282 1.431777044  
 S -0.349385481 1.822209598 0.816738393  
 C 1.512904540 -1.636541103 -0.496680280  
 C 0.897480384 -2.852171114 -0.992785729  
 C -0.026285606 -2.989316069 -2.072215445  
 C -0.582032103 -4.243403079 -2.360457042  
 C -0.243562841 -5.377183451 -1.625363962  
 C 0.692007749 -5.267980328 -0.589259914  
 C 1.250424724 -4.035170554 -0.293964324  
 H 1.967432266 -3.955208745 0.519168945  
 H 0.982199533 -6.143649848 -0.016381720  
 H -0.685687677 -6.337309733 -1.873228194  
 H -1.275231676 -4.323582511 -3.192630722  
 S -0.597565540 -1.639152920 -3.089821381  
 C 0.941155042 -0.963890608 -3.818531428  
 H 0.616367600 -0.224206497 -4.554150532  
 H 1.542109786 -0.474847206 -3.052464984  
 H 1.496500572 -1.761361825 -4.316257376  
 H 2.354518032 -1.798143701 0.182689436  
 C -3.437265019 -2.901556725 1.218241407  
 C -3.345487200 -1.718215288 0.189794394  
 O -1.897164725 -1.406738060 0.244046632  
 C -3.707829356 -2.072433779 -1.245292558  
 C -4.064292179 -0.444369689 0.637997530  
 O -2.325709042 -2.628829059 2.125386486  
 C -3.155402255 -4.270971045 0.593133140  
 C -4.727398542 -2.932273796 2.030494491  
 B -1.421285582 -1.859967958 1.471922216  
 H -0.342837185 -1.593218717 1.872247619  
 H -3.083292212 -2.878708670 -1.631017023

H -4.757695641 -2.376983475 -1.302134948  
H -3.568089829 -1.197293994 -1.885964861  
H -3.045050276 -5.005643741 1.395008424  
H -3.975374971 -4.588046418 -0.057662503  
H -2.229380701 -4.260397020 0.012801537  
H -3.772490927 0.377815225 -0.023279409  
H -5.149557895 -0.563361215 0.582879577  
H -3.785989595 -0.170513513 1.658970041  
H -4.856817367 -2.019329699 2.613499963  
H -5.592764455 -3.055429014 1.371042058  
H -4.702478107 -3.777408469 2.723419415

12

Mn -0.989058914 0.030568623 -1.124116246  
C -1.321926645 1.430045671 -2.514109051  
O -1.538683500 2.207207095 -3.345786138  
N 0.996613425 -0.628276115 -0.761983174  
C 1.694036872 0.308486175 0.060263147  
C 0.972072441 1.065680246 1.012642214  
C 1.674738867 1.992442043 1.792984719  
C 3.048069139 2.177228066 1.635956319  
C 3.751152282 1.428426854 0.691035751  
C 3.073968156 0.495306484 -0.090646979  
H 3.601291913 -0.077146649 -0.848895840  
H 4.818976485 1.573601010 0.555509532  
H 3.566337236 2.907502930 2.250713910  
H 1.126758195 2.568139307 2.532206693  
S -0.797756030 0.894922877 1.230761483  
C 1.466032152 -1.845762362 -0.771420785  
C 0.914816471 -3.024337670 -1.424691823  
C -0.054535536 -3.089011153 -2.462493189  
C -0.573326627 -4.326813478 -2.858133889  
C -0.143534662 -5.514539926 -2.270035474  
C 0.849110680 -5.474300578 -1.287913329  
C 1.369705328 -4.252039750 -0.888530037  
H 2.125038122 -4.224897676 -0.107632819  
H 1.211358319 -6.391136919 -0.832906747  
H -0.563983612 -6.461936721 -2.593322211  
H -1.315788724 -4.351084639 -3.649770569  
S -0.721994977 -1.668370062 -3.315194521  
C 0.773026622 -0.894290281 -4.037891725  
H 0.415288248 -0.041938119 -4.619563737  
H 1.430975033 -0.537461652 -3.245583374  
H 1.281027643 -1.606157516 -4.691453557  
H 2.321476225 -2.059145639 -0.125226273  
C -3.214677269 -2.324880763 1.700840670  
C -3.137569748 -1.899716648 0.193670859  
O -1.713951639 -1.628556650 0.050347882  
C -3.509722679 -2.977525236 -0.819335465  
C -3.917549381 -0.608146054 -0.089190750  
O -2.217646695 -1.498562099 2.315863960  
C -2.808909182 -3.794112791 1.907339088  
C -4.559796672 -2.050682181 2.370837912  
B -1.175449690 -1.283570914 1.393678364  
H -0.060833719 -1.666033057 1.612896309  
H -2.838098698 -3.834686703 -0.749671946  
H -4.539806437 -3.314335517 -0.663718467  
H -3.435058781 -2.573882870 -1.833744089

H -2.665998138 -3.965671962 2.977741777  
H -3.573452530 -4.486808714 1.541553085  
H -1.865134999 -4.012001763 1.398817134  
H -3.699376478 -0.255364488 -1.105877495  
H -4.997210231 -0.770806085 -0.027926306  
H -3.642066515 0.179559229 0.616456618  
H -4.784901697 -0.983102186 2.382952279  
H -5.369893045 -2.580760785 1.857849124  
H -4.527068889 -2.397819870 3.407584056

12-TS

Mn -0.847402469 -0.063001645 -1.606553426  
C -1.411997722 1.391740391 -2.736334152  
O -1.781597096 2.274562072 -3.399572421  
N 0.918249700 -0.709665830 -0.731884716  
C 1.418804084 0.409079105 -0.008657039  
C 1.062846611 0.744054238 1.323682490  
C 1.685937820 1.863280145 1.912704835  
C 2.575237271 2.664612745 1.209812546  
C 2.871043536 2.372810021 -0.126787067  
C 2.294352391 1.257695464 -0.716011423  
H 2.521026733 0.988649892 -1.744227762  
H 3.551536658 3.000402178 -0.694063741  
H 3.021790348 3.526500848 1.697035166  
H 1.429681501 2.116336467 2.938085276  
S -0.170764589 -0.040865220 2.360682175  
C 0.932180765 -1.904032496 -0.118775141  
C 0.705794056 -3.200997008 -0.832071449  
C 0.064074638 -3.407746890 -2.075168617  
C -0.125151191 -4.711520590 -2.555448376  
C 0.311274905 -5.820486740 -1.835112982  
C 0.953605933 -5.629739223 -0.612006798  
C 1.140903123 -4.339507524 -0.129334105  
H 1.624459830 -4.195989891 0.833421578  
H 1.303286793 -6.479448569 -0.033617366  
H 0.149754861 -6.820026341 -2.227378894  
H -0.626581873 -4.846017141 -3.509046833  
S -0.595310969 -2.102730374 -3.135949883  
C 0.947634753 -1.522414960 -3.946995837  
H 0.659176293 -0.719332052 -4.628739784  
H 1.622851992 -1.140599433 -3.179534713  
H 1.401659772 -2.345187338 -4.502134442  
H 1.634930528 -2.008477952 0.714635007  
C -3.239499575 -2.263752989 1.211303797  
C -3.264342707 -1.030692376 0.246612426  
O -1.834624705 -0.784953744 0.074837173  
C -3.878533544 -1.288983822 -1.125173660  
C -3.858991648 0.227169393 0.884907874  
O -2.110647913 -1.974413676 2.055949236  
C -2.963460997 -3.581941169 0.471099915  
C -4.481157985 -2.395636864 2.088806380  
B -1.156345928 -1.270914913 1.299538332  
H -0.192060631 -2.050264530 0.804062510  
H -3.342458892 -2.073888976 -1.662553149  
H -4.927284905 -1.586118455 -1.026344005  
H -3.844725402 -0.376416041 -1.730814483  
H -2.732111650 -4.353765619 1.209752419  
H -3.828716972 -3.908699613 -0.114205969



H -2.104084025 -3.487287276 -0.197389147  
H -3.625134624 1.088904395 0.252276573  
H -4.946111449 0.149536233 0.979534583  
H -3.424279766 0.401170471 1.871696443  
H -4.596559580 -1.528495624 2.741077169  
H -5.381768394 -2.500530200 1.473949091  
H -4.392433322 -3.284654944 2.719394564

13

Mn -0.597989032 -0.469773098 -1.541360456  
C -1.091371619 0.563404157 -3.090374164  
O -1.430269235 1.204399238 -4.008271484  
N 0.913858943 -1.015339320 -0.413570823  
C 1.328177729 0.052779482 0.376730116  
C 0.888368786 0.316231269 1.703578634  
C 1.340620411 1.441707111 2.402293830  
C 2.200828245 2.359255849 1.803528286  
C 2.602193432 2.151633761 0.481218991  
C 2.178795096 1.022373029 -0.208087060  
H 2.505459379 0.832343729 -1.226592066  
H 3.262893300 2.863670686 -0.007613231  
H 2.536874740 3.231434866 2.356079577  
H 0.986770913 1.608848434 3.415629939  
S -0.286407679 -0.743235637 2.572150197  
C 1.004478784 -2.381511408 0.098965367  
C 1.470764342 -3.306820543 -1.012977837  
C 0.632293935 -3.659261569 -2.087960784  
C 1.093192871 -4.486841072 -3.117123173  
C 2.404667889 -4.958678928 -3.099007656  
C 3.250951693 -4.614053740 -2.047256724  
C 2.777341367 -3.799894913 -1.018730102  
H 3.437126559 -3.522283989 -0.201038629  
H 4.274679189 -4.976332197 -2.026208968  
H 2.755482215 -5.596699349 -3.905627736  
H 0.440925549 -4.773663843 -3.934403428  
S -1.061874262 -3.032118945 -2.092130442  
C -1.508264464 -3.046906584 -3.865518825  
H -2.416832258 -2.447515548 -3.948328787  
H -0.714990381 -2.574921925 -4.447567437  
H -1.705864793 -4.060406419 -4.220965065  
H 1.715922623 -2.439997941 0.932719246  
C -3.972058518 -1.274066953 1.139241469  
C -3.481030761 -0.212163802 0.102966347  
O -2.006775964 -0.333915755 0.249794981  
C -3.872682200 -0.502264802 -1.338222832  
C -3.826277930 1.229028860 0.477949522  
O -2.943669211 -1.193599443 2.163921097  
C -3.950111599 -2.703995337 0.590844178  
C -5.318798532 -0.957339303 1.777526447  
B -1.797181728 -0.737387873 1.577554788  
H 0.052515725 -2.761145868 0.504140983  
H -3.467036759 -1.454591749 -1.683740386  
H -4.963169072 -0.542203438 -1.421844243  
H -3.512518534 0.290009528 -1.998621040  
H -4.084087208 -3.399184740 1.422350518  
H -4.753589613 -2.869004860 -0.132572444  
H -2.995449155 -2.929297606 0.109015756  
H -3.252610357 1.906141957 -0.160146790

H -4.891675538 1.428406982 0.330502618  
H -3.571567578 1.438066827 1.520254975  
H -5.292477514 -0.008323374 2.314930545  
H -6.103525897 -0.911505346 1.015427274  
H -5.579353534 -1.744289993 2.490365902

14

Mn -1.097260732 -0.458628016 -1.525754678  
C -0.958995905 0.407003361 -3.241848226  
O -0.898807845 0.945827140 -4.271968092  
N -0.226548270 -1.179411332 0.317198293  
C 0.888456064 -0.274769968 0.481402869  
C 0.767467887 0.663252854 1.529586896  
C 1.786827596 1.599323611 1.732073015  
C 2.907502974 1.604463587 0.900044737  
C 3.016105769 0.690237782 -0.149407177  
C 2.001984924 -0.246149153 -0.364877683  
H 2.070908644 -0.947411002 -1.189249417  
H 3.879021041 0.709245844 -0.808099834  
H 3.692566210 2.336647858 1.065282341  
H 1.695953640 2.323572256 2.536191785  
S -0.714874084 0.534380206 2.475291243  
C 0.073203114 -2.617227388 0.560489445  
C 1.030849696 -3.229485764 -0.439320399  
C 0.705021942 -3.415143858 -1.801195892  
C 1.652100122 -3.935176135 -2.690404475  
C 2.926197031 -4.281548444 -2.239609391  
C 3.257911148 -4.118891128 -0.897204663  
C 2.312300255 -3.596902884 -0.016718832  
H 2.575120425 -3.439390133 1.024768979  
H 4.247440661 -4.385268731 -0.538539488  
H 3.650917510 -4.681133789 -2.943086534  
H 1.409113242 -4.083573997 -3.735772679  
S -0.954701706 -2.984541015 -2.357882061  
C -0.780787805 -2.860304825 -4.171821810  
H -1.719159091 -2.426714966 -4.521632088  
H 0.040770933 -2.190048275 -4.431609653  
H -0.643189464 -3.842864928 -4.627370730  
H 0.481615538 -2.737266120 1.571904750  
C -3.678563072 -1.566548654 1.088495899  
C -3.710963176 -0.157261174 0.381500358  
O -2.311891853 0.041193032 0.072402044  
C -4.503948420 -0.103519536 -0.923165063  
C -4.148504981 0.981692283 1.308697083  
O -2.385170940 -1.611950035 1.705659660  
C -3.777658895 -2.729494663 0.091470954  
C -4.738679291 -1.737176498 2.176930940  
B -1.494595322 -0.658093322 1.138915316  
H -0.890396472 -3.133672367 0.549207043  
H -4.100017367 -0.796823625 -1.667636185  
H -5.554806747 -0.358633532 -0.752756128  
H -4.460748357 0.906965748 -1.341892522  
H -3.553074053 -3.661867969 0.616965359  
H -4.775935556 -2.812999131 -0.350049375  
H -3.051976856 -2.620523069 -0.716058086  
H -3.934972795 1.935501498 0.819935881  
H -5.220209782 0.927108992 1.520865781  
H -3.599834654 0.961299191 2.251648503

H -4.595282583 -1.015144160 2.982035471  
H -5.747687310 -1.617685478 1.766191333  
H -4.660981617 -2.739958369 2.606908618

### Frequencies

#### Benzene

414.09 414.12 620.41 620.45 693.76 717.37  
864.13 864.13 975.64 975.68 1013.80 1015.93  
1020.09 1067.75 1067.85 1189.33 1208.45 1208.57  
1358.35 1378.11 1523.64 1523.80 1654.00 1654.01  
3171.52 3181.53 3181.57 3198.10 3198.20 3209.20

#### Benzonitrile

148.48 167.06 391.82 410.78 465.11 562.93  
572.21 637.02 703.78 774.07 778.23 860.92  
942.85 982.86 1011.12 1015.62 1054.93 1113.23  
1200.40 1212.02 1226.29 1336.89 1364.23 1486.12  
1534.22 1631.88 1658.06 2347.81 3186.78 3197.78  
3206.71 3216.91 3219.82

#### CO

2203.61

#### Diborylamine

20.69 27.27 29.34 31.16 53.56 58.12  
88.06 111.03 114.57 120.82 157.32 193.16  
203.16 225.46 228.66 239.92 243.28 252.89  
284.03 292.76 294.82 305.45 322.52 323.83  
326.82 329.44 337.19 337.83 366.63 370.49  
379.70 379.93 403.03 410.86 419.19 440.60  
454.90 473.52 494.49 511.32 525.71 528.04  
568.64 585.60 587.16 631.05 639.90 657.98  
661.54 677.02 690.36 710.49 713.57 751.06  
807.83 840.85 863.02 867.86 869.12 869.95  
893.66 913.98 939.65 940.71 946.27 947.25  
955.08 976.02 977.81 983.67 991.07 997.23  
1006.57 1013.56 1022.24 1022.34 1033.21 1033.54  
1055.68 1078.51 1112.58 1146.79 1147.21 1151.94  
1182.83 1192.28 1192.44 1193.88 1196.89 1215.89  
1221.25 1249.86 1250.54 1270.26 1270.46 1293.90  
1302.66 1308.20 1323.08 1341.53 1355.08 1364.08  
1398.13 1414.82 1414.93 1416.97 1417.46 1427.30  
1427.41 1436.76 1437.10 1461.26 1485.88 1486.17  
1492.15 1493.05 1493.14 1496.51 1498.17 1499.59  
1501.85 1502.11 1511.98 1517.36 1519.03 1520.64  
1523.02 1523.64 1524.02 1539.43 1540.95 1541.66  
1636.22 1662.53 3048.31 3048.39 3050.27 3050.45  
3052.97 3053.24 3057.08 3057.14 3057.57 3099.95  
3120.74 3121.04 3121.95 3122.29 3127.81 3127.85  
3129.27 3129.96 3132.90 3134.48 3135.02 3135.35  
3148.51 3150.16 3150.50 3151.59 3152.92 3164.41  
3168.55 3183.25 3195.69

### HBpin

95.08 231.19 246.71 285.05 292.10 296.30  
321.41 332.14 361.37 372.42 398.72 449.58  
512.93 523.12 583.09 667.74 748.51 806.37  
867.91 905.22 937.33 946.66 964.64 977.77  
1022.53 1031.00 1065.17 1144.70 1183.05 1190.97  
1206.98 1244.25 1272.06 1301.97 1383.03 1415.48  
1418.64 1428.49 1438.59 1484.91 1494.32 1497.09  
1501.96 1518.11 1520.71 1522.99 1541.89 2714.12  
3051.59 3054.41 3055.97 3060.55 3124.46 3125.12  
3133.34 3133.99 3137.19 3137.85 3153.73 3154.06

#### Off-cycle intermediate, 9

20.06 24.65 36.95 42.78 48.98 53.92  
68.73 73.43 89.66 100.65 109.48 115.05  
131.14 143.16 155.70 158.12 182.00 185.67  
212.15 234.90 237.39 244.69 258.69 271.01  
292.53 296.19 301.96 302.48 308.03 320.91  
333.04 341.54 356.75 371.94 380.94 395.21  
405.45 412.35 432.31 439.61 445.51 448.96  
473.25 490.26 514.41 521.35 534.93 560.56  
580.77 591.31 593.27 651.08 669.91 678.90  
691.18 699.47 707.00 739.91 751.27 764.41  
780.94 795.58 842.70 854.18 869.14 872.85  
880.50 938.30 941.39 944.33 947.40 954.74  
971.33 983.92 986.93 990.91 991.85 999.81  
1005.94 1024.63 1029.34 1050.25 1062.29 1065.63  
1081.83 1091.07 1150.42 1156.76 1166.21 1181.52  
1192.49 1196.42 1204.12 1206.26 1235.11 1244.82  
1269.24 1274.62 1289.53 1295.09 1318.98 1329.95  
1357.88 1365.76 1389.43 1400.94 1404.33 1417.15  
1420.61 1429.85 1440.24 1469.75 1478.33 1484.55  
1485.72 1489.75 1494.22 1496.51 1501.98 1508.05  
1517.12 1518.81 1520.95 1522.21 1525.06 1543.42  
1609.60 1630.31 1639.61 1651.14 2013.76 3051.76  
3055.24 3056.32 3057.53 3060.14 3064.25 3113.62  
3124.58 3126.43 3129.51 3133.70 3139.21 3151.87  
3154.27 3160.29 3162.97 3166.29 3169.04 3177.73  
3184.41 3193.56 3198.57 3206.21 3208.12 3219.17

#### Off-cycle intermediate, 9'

14.57 23.25 33.31 42.36 46.56 49.87  
54.20 57.54 65.26 74.47 98.08 100.29  
112.94 120.16 124.89 132.00 137.81 161.85  
184.50 196.11 217.61 226.35 232.89 253.67  
254.56 267.05 268.04 278.16 288.70 290.63  
300.35 308.28 318.09 320.40 330.47 335.94  
344.25 353.40 371.24 376.03 394.87 405.61  
408.85 416.11 435.72 438.83 449.28 472.30  
485.03 514.50 522.19 524.80 552.78 582.55  
596.23 607.71 648.41 674.53 680.46 686.26  
695.80 718.84 737.44 748.71 760.06 780.64  
801.15 839.87 861.94 869.79 871.82 875.18  
930.34 939.62 940.99 944.21 948.05 974.32  
982.54 983.86 989.23 990.32 994.74 1013.86  
1022.65 1033.20 1056.85 1064.74 1082.21 1087.39

1099.39 1147.14 1154.03 1165.28 1186.56 1192.39  
1195.08 1206.28 1227.84 1236.83 1249.48 1270.64  
1275.81 1289.92 1302.65 1322.28 1323.04 1355.77  
1361.64 1368.64 1406.08 1414.72 1418.18 1428.67  
1438.89 1466.64 1472.63 1477.15 1486.02 1488.74  
1493.67 1495.39 1496.78 1499.99 1506.31 1511.06  
1515.77 1519.66 1520.51 1523.68 1539.84 1609.42  
1632.05 1638.79 1650.66 2038.88 2119.61 3035.05  
3049.84 3051.13 3055.82 3059.40 3065.42 3107.67  
3122.76 3124.51 3127.64 3128.57 3134.62 3137.01  
3151.62 3162.57 3167.08 3167.51 3170.18 3177.31  
3181.99 3190.51 3196.51 3204.67 3207.57 3225.10

Mn-H species, 10

19.83 31.10 33.98 39.81 50.08 52.43  
59.32 72.45 98.99 103.22 114.62 116.68  
120.27 131.86 144.37 159.41 168.89 179.03  
197.18 209.87 235.64 238.58 247.85 254.34  
280.74 283.84 300.03 301.26 317.88 321.60  
326.25 337.27 342.42 351.02 357.08 367.97  
370.72 393.38 419.00 429.04 450.15 455.29  
460.28 480.77 498.62 521.73 528.00 529.31  
553.24 575.76 580.51 604.77 620.68 644.17  
659.71 672.02 673.39 684.22 706.35 714.17  
744.48 750.73 768.40 802.27 815.62 831.02  
853.72 858.11 865.04 875.54 913.85 944.08  
945.66 949.32 953.94 970.66 976.26 982.09  
985.12 1026.59 1037.18 1038.43 1046.99 1064.85  
1080.97 1128.79 1133.83 1134.44 1151.07 1158.19  
1169.96 1193.44 1195.15 1198.16 1205.60 1233.58  
1242.72 1275.24 1279.20 1286.43 1298.15 1302.91  
1320.32 1343.02 1376.65 1381.43 1411.50 1418.54  
1423.89 1431.21 1435.84 1444.87 1448.89 1470.12  
1485.96 1490.54 1495.31 1497.36 1502.76 1506.26  
1510.19 1521.37 1522.48 1524.88 1529.97 1535.23  
1546.88 1560.97 1601.53 1620.97 1636.59 2207.07  
2548.00 2632.13 2692.75 3042.32 3054.05 3057.50  
3061.91 3098.44 3125.35 3127.15 3130.49 3133.87  
3136.43 3138.89 3151.03 3154.07 3168.07 3175.33  
3184.38 3190.24 3190.61 3196.97 3208.76 3210.26

THF

50.37 263.18 583.02 673.58 852.73 891.26  
911.25 922.43 931.06 977.19 1035.46 1112.85  
1176.82 1190.73 1196.11 1262.02 1265.07 1321.31  
1353.47 1375.72 1413.68 1500.75 1511.86 1537.67  
1551.82 2987.21 2993.35 3051.90 3053.98 3067.95  
3068.58 3113.89 3122.63

1

37.57 50.11 56.53 74.09 83.99 87.58  
96.57 100.98 106.61 113.08 141.31 162.22  
173.45 189.50 214.14 222.23 240.11 265.00  
272.90 279.70 311.43 350.54 371.33 395.21  
428.72 443.25 458.55 461.49 471.20 474.43  
476.52 479.64 517.00 525.39 535.50 567.76

579.68 591.64 639.98 645.48 660.00 684.03  
690.43 712.57 718.82 737.92 742.17 763.28  
772.46 847.66 868.22 879.55 919.73 937.18  
950.80 972.19 984.65 987.98 996.53 997.84  
1062.31 1063.14 1082.76 1092.23 1154.36 1164.63  
1195.15 1207.03 1207.80 1264.88 1289.57 1304.01  
1337.12 1347.67 1369.59 1414.08 1473.94 1477.14  
1479.85 1489.30 1492.91 1515.99 1602.25 1615.06  
1629.50 1643.64 1666.18 2045.05 2067.10 2118.60  
3065.78 3114.73 3165.79 3170.91 3178.03 3181.61  
3184.22 3194.96 3201.87 3209.93 3214.19 3228.99

2

25.50 33.15 45.91 48.24 50.77 88.15  
109.92 122.58 150.35 153.58 179.65 194.11  
214.82 229.52 258.20 270.64 282.24 311.20  
321.49 342.62 357.36 392.75 408.71 426.87  
440.18 449.21 479.15 518.71 558.18 573.64  
580.65 652.40 676.96 709.41 713.86 725.73  
736.77 762.74 770.59 846.27 865.11 872.17  
911.82 937.54 941.48 960.41 980.10 986.64  
993.19 994.94 1057.12 1062.99 1079.54 1091.66  
1152.27 1165.94 1197.68 1208.14 1210.38 1260.40  
1291.02 1302.85 1327.89 1343.17 1367.56 1403.64  
1471.87 1473.66 1481.51 1487.09 1492.54 1507.34  
1579.80 1602.11 1618.84 1639.51 1644.71 2008.41  
3057.48 3096.01 3155.91 3159.60 3179.69 3180.27  
3187.83 3195.08 3202.99 3210.29 3214.21 3234.39

32

28.14 41.78 58.16 79.14 90.61 103.49  
132.89 156.80 162.81 186.80 209.64 218.74  
243.18 250.13 265.92 319.39 332.73 339.77  
371.93 399.02 428.87 442.55 463.75 473.88  
496.29 506.06 538.82 559.21 577.33 581.44  
605.74 658.28 682.22 700.48 720.38 731.19  
743.10 764.73 772.98 849.03 867.43 875.14  
924.52 938.48 950.03 969.46 983.75 985.22  
996.25 1002.99 1065.41 1066.72 1083.25 1093.37  
1154.08 1169.77 1191.49 1202.50 1208.53 1253.15  
1289.34 1301.77 1344.04 1357.40 1369.46 1434.17  
1468.24 1474.12 1475.22 1490.29 1496.28 1515.52  
1574.85 1610.62 1617.51 1635.28 1643.73 1989.49  
3073.57 3128.60 3173.51 3178.77 3182.47 3186.65  
3187.02 3195.34 3200.60 3208.78 3211.44 3223.32

12

31.36 47.32 57.10 72.03 85.18 101.24  
128.05 149.52 185.00 190.62 205.96 221.07  
239.98 262.24 267.80 317.19 333.62 349.51  
377.56 400.66 426.02 443.93 457.26 472.22  
497.11 515.34 530.60 551.72 566.11 579.98  
608.23 656.15 678.02 698.04 717.86 731.54  
739.88 764.42 772.37 847.25 865.77 873.52  
919.18 935.01 944.32 960.50 976.66 985.55  
988.29 993.86 1060.34 1064.46 1080.75 1090.44

1152.15 1167.17 1193.59 1205.95 1208.20 1260.11  
1289.06 1302.88 1339.01 1354.19 1361.25 1424.78  
1469.44 1473.28 1474.93 1485.95 1493.44 1514.33  
1585.55 1606.58 1620.46 1638.83 1646.80 1993.94  
3063.91 3127.08 3159.61 3174.71 3180.12 3180.84  
3190.57 3194.04 3202.70 3210.17 3211.22 3220.89

3

26.09 29.82 42.62 51.86 59.20 66.26  
79.56 89.64 92.30 106.80 112.85 118.70  
129.71 139.61 140.93 147.71 158.17 170.19  
185.86 203.99 211.08 245.07 271.34 289.79  
302.09 316.30 323.88 333.22 340.56 358.11  
366.43 412.91 446.60 465.28 480.31 522.09  
558.75 569.80 585.85 588.36 649.21 677.14  
690.00 691.16 706.54 735.30 744.72 764.86  
774.24 842.13 845.38 869.13 879.90 883.09  
901.83 906.89 923.61 925.16 931.35 944.86  
963.50 979.58 981.84 986.48 992.01 998.71  
1047.13 1055.84 1059.38 1072.92 1076.43 1081.41  
1148.81 1160.00 1172.63 1194.11 1194.45 1200.29  
1207.97 1218.27 1256.34 1259.60 1274.24 1285.89  
1293.26 1327.28 1327.71 1348.69 1358.44 1363.93  
1379.54 1397.26 1406.95 1463.50 1467.93 1468.95  
1478.03 1490.93 1502.14 1502.77 1512.90 1532.62  
1544.48 1556.62 1599.75 1605.35 1631.89 1636.83  
2004.15 3019.52 3055.79 3063.99 3070.45 3083.00  
3086.66 3104.59 3121.97 3133.89 3143.30 3169.14  
3172.20 3174.70 3181.93 3185.81 3189.21 3197.69  
3201.69 3205.93 3211.95

33

26.27 46.35 56.51 61.51 70.03 78.07  
94.33 102.48 115.02 120.98 128.55 138.22  
151.55 161.81 176.28 181.74 184.66 201.04  
207.61 216.03 250.37 259.06 280.12 302.80  
315.55 340.61 357.08 364.34 416.03 437.20  
462.69 476.48 482.81 497.17 527.89 549.69  
561.12 570.68 584.39 586.03 652.97 677.60  
688.92 690.64 708.38 739.55 746.85 766.78  
776.73 842.83 851.46 870.40 884.67 886.98  
897.72 910.19 927.20 931.77 934.64 949.65  
967.99 980.12 984.36 985.84 994.04 999.65  
1048.91 1058.00 1058.48 1068.00 1079.15 1082.83  
1147.54 1158.71 1172.78 1193.08 1195.04 1202.03  
1207.87 1214.67 1257.85 1264.61 1272.78 1288.24  
1294.47 1327.63 1331.51 1344.14 1358.97 1361.17  
1383.11 1405.24 1408.51 1463.49 1470.69 1471.75  
1473.06 1487.21 1501.58 1508.74 1511.90 1531.72  
1544.01 1591.75 1602.45 1622.45 1640.34 1650.00  
1966.88 3022.32 3060.12 3072.29 3073.12 3074.56  
3076.07 3111.11 3126.03 3134.11 3154.11 3173.18  
3175.44 3178.10 3179.20 3191.36 3192.63 3196.26  
3203.67 3205.27 3213.52

13

32.52 47.97 61.31 64.36 72.08 86.01  
97.31 104.89 121.56 125.72 135.21 151.22  
163.75 176.60 186.30 192.47 200.66 214.34  
218.70 257.49 266.42 278.22 278.42 304.50  
335.19 347.02 364.82 399.58 426.85 459.09  
476.24 486.97 503.22 529.16 540.79 572.19  
575.85 586.11 588.60 627.76 656.37 677.62  
689.79 691.70 712.89 740.10 747.36 766.38  
776.72 841.54 847.85 870.02 883.66 886.93  
900.03 902.45 926.80 928.26 932.83 944.13  
962.95 979.59 984.26 985.33 992.07 997.78  
1050.21 1058.54 1060.42 1071.39 1080.50 1083.06  
1147.92 1158.14 1172.00 1192.42 1196.08 1201.03  
1204.18 1218.35 1260.94 1264.00 1274.28 1286.48  
1294.96 1327.78 1334.00 1345.12 1358.07 1358.51  
1383.15 1405.62 1408.73 1464.42 1471.60 1473.28  
1473.76 1488.11 1501.79 1510.70 1512.40 1531.34  
1544.09 1589.50 1603.87 1620.94 1635.66 1643.57  
1989.80 3011.96 3058.97 3070.23 3075.51 3077.16  
3110.32 3124.73 3127.42 3134.79 3153.06 3174.51  
3175.33 3175.62 3180.94 3186.59 3189.68 3197.26  
3201.11 3206.22 3211.56

4"

12.79 15.80 18.32 30.58 38.90 43.75  
45.91 54.33 61.37 64.31 69.44 80.87  
86.18 89.30 94.15 102.25 109.29 114.53  
131.83 137.32 143.46 155.12 163.16 173.00  
179.49 192.30 207.75 212.47 234.48 244.17  
252.53 259.76 286.76 319.42 330.16 357.97  
380.02 395.71 409.64 413.93 421.10 425.10  
449.05 463.38 475.53 476.52 528.18 557.52  
567.18 569.01 575.96 601.82 617.92 619.86  
636.09 649.47 673.78 687.94 701.14 709.76  
710.77 714.22 716.23 744.23 745.97 765.29  
774.95 780.77 813.79 849.24 859.46 866.19  
870.06 870.46 886.44 917.40 938.70 943.16  
951.88 966.35 974.37 985.98 986.43 993.39  
993.65 998.69 1012.87 1014.72 1017.39 1020.41  
1022.22 1041.02 1053.78 1060.88 1063.87 1067.00  
1069.39 1078.36 1117.51 1148.68 1159.36 1192.64  
1192.78 1195.25 1201.00 1207.06 1208.75 1210.74  
1214.40 1230.31 1268.40 1279.30 1294.88 1322.97  
1341.89 1343.20 1355.09 1358.15 1371.22 1380.71  
1386.72 1449.86 1466.96 1468.37 1485.91 1486.68  
1492.18 1497.06 1518.21 1521.78 1527.45 1531.48  
1563.67 1605.24 1624.78 1625.15 1626.44 1642.28  
1646.11 1651.44 2182.08 2304.97 3067.93 3110.61  
3166.01 3167.91 3169.45 3177.71 3179.72 3180.23  
3180.34 3182.06 3187.41 3187.72 3189.52 3192.51  
3196.12 3198.60 3200.63 3206.48 3207.01 3209.49  
3209.85 3217.19 3220.29

4-TS'''

-335.13 15.95 30.30 33.00 37.59 42.04  
47.36 50.05 52.37 60.93 73.16 89.31  
90.58 94.87 109.49 126.50 131.39 136.57

139.46 157.18 174.85 180.26 183.70 188.71  
197.58 209.01 219.41 236.50 241.85 254.32  
263.81 268.31 272.82 292.85 301.52 305.46  
318.36 321.26 329.64 335.69 351.14 353.19  
357.06 361.75 384.28 393.15 397.85 406.58  
417.21 430.44 433.35 437.62 464.36 492.58  
496.52 512.03 521.20 531.69 534.21 557.31  
566.72 579.63 582.15 591.10 626.25 642.18  
676.40 678.78 691.58 703.17 710.07 716.26  
727.87 743.68 749.34 767.97 773.81 775.51  
798.20 842.52 856.24 856.93 866.06 872.62  
876.63 896.69 919.89 929.31 938.67 946.15  
947.20 950.70 958.51 965.17 978.16 979.37  
986.89 991.04 993.42 998.40 1001.68 1008.27  
1010.34 1022.30 1033.29 1051.89 1058.84 1061.03  
1077.75 1082.13 1084.37 1117.02 1144.52 1153.90  
1157.94 1187.81 1192.13 1192.92 1197.11 1200.58  
1202.96 1211.81 1218.29 1245.64 1246.17 1259.08  
1266.73 1284.65 1293.78 1307.15 1315.31 1328.70  
1336.05 1350.11 1353.10 1367.06 1412.89 1418.53  
1427.35 1437.86 1451.38 1460.56 1469.43 1477.79  
1485.88 1488.69 1491.05 1492.17 1493.76 1500.07  
1501.24 1510.86 1513.52 1518.13 1522.55 1523.65  
1539.19 1575.07 1609.99 1611.70 1633.17 1636.34  
1642.51 1655.62 2047.42 2129.81 3048.71 3049.96  
3053.93 3059.19 3066.27 3088.35 3115.17 3122.02  
3128.78 3130.96 3138.54 3147.94 3151.81 3155.62  
3165.20 3173.76 3175.80 3178.98 3187.48 3189.31  
3193.59 3194.80 3196.94 3197.65 3206.55 3206.80  
3209.95 3211.82 3214.05

4-TS"

-182.75 18.21 23.57 30.99 37.41 42.34  
45.72 47.61 50.48 53.83 60.12 70.10  
72.02 81.20 91.64 92.54 97.58 98.43  
104.73 108.93 117.18 123.70 124.89 131.54  
140.80 142.37 151.42 171.35 179.94 186.04  
192.62 197.55 219.66 226.28 232.82 238.39  
246.76 250.41 259.09 263.85 274.61 292.54  
305.78 318.93 329.04 333.43 334.63 347.94  
357.53 371.83 376.69 385.77 392.97 407.11  
417.03 420.06 421.75 425.06 432.49 448.83  
450.31 464.65 483.77 504.31 524.09 525.82  
527.18 552.27 574.84 577.10 585.25 599.12  
617.22 618.39 630.08 650.06 669.70 673.49  
688.07 698.26 708.02 709.69 713.62 717.69  
722.56 729.19 748.56 750.11 772.41 774.53  
790.88 811.41 845.79 852.75 861.46 870.36  
873.33 879.31 879.99 899.52 916.99 931.82  
943.72 945.74 952.01 959.44 962.57 976.30  
977.81 985.47 986.26 992.31 995.03 998.86  
1000.51 1008.80 1009.76 1014.37 1016.79 1018.44  
1020.75 1029.91 1040.35 1042.41 1054.87 1056.10  
1061.08 1066.37 1068.33 1071.36 1084.86 1090.13  
1120.47 1153.54 1160.08 1172.01 1184.66 1188.39  
1196.59 1197.53 1199.17 1199.94 1203.33 1206.64  
1212.37 1219.08 1220.46 1244.61 1257.47 1264.38  
1278.20 1281.63 1304.89 1310.05 1327.97 1339.82

1347.97 1356.85 1359.50 1370.33 1372.59 1386.63  
1411.66 1415.58 1425.21 1435.09 1451.32 1464.40  
1473.23 1480.65 1484.40 1487.71 1492.85 1495.01  
1498.65 1501.37 1509.11 1512.33 1516.66 1517.98  
1518.66 1524.60 1526.74 1531.81 1540.15 1566.37  
1609.77 1613.05 1625.04 1633.61 1640.67 1644.37  
1655.44 1656.65 2100.36 2180.72 3046.00 3047.61  
3050.36 3054.25 3068.25 3109.46 3113.09 3115.42  
3121.74 3126.49 3134.94 3138.22 3147.11 3149.68  
3167.08 3168.31 3174.75 3177.44 3180.42 3181.32  
3183.84 3188.35 3188.95 3190.00 3192.34 3196.24  
3200.05 3202.82 3206.18 3207.35 3211.21 3216.86  
3221.34 3229.21 3239.40

4-TS'

-253.20 21.88 26.08 35.89 36.97 43.50  
46.11 48.44 54.86 57.92 70.28 74.88  
76.50 80.52 90.74 92.54 101.83 104.64  
112.73 121.15 134.13 139.02 139.56 148.78  
155.19 159.10 169.96 176.89 188.48 192.92  
198.48 209.90 220.39 231.84 234.39 240.42  
246.27 247.59 258.91 265.97 273.38 280.89  
289.22 298.97 300.75 309.12 322.18 335.73  
338.45 347.67 356.77 365.24 379.81 382.31  
392.00 405.45 418.50 425.35 431.44 444.87  
452.69 457.73 483.42 506.18 519.24 522.51  
523.96 550.03 573.97 578.62 581.98 586.43  
594.76 630.71 650.28 669.66 674.86 681.31  
691.99 704.54 707.28 711.81 714.18 729.57  
739.64 747.46 770.84 774.59 794.58 795.35  
849.28 853.53 855.67 856.44 869.14 874.37  
875.91 881.46 888.34 919.49 928.67 931.10  
931.14 934.34 943.11 948.90 960.37 965.46  
970.92 978.10 981.56 983.58 985.48 990.20  
998.30 1008.34 1014.66 1017.95 1022.61 1029.86  
1041.68 1047.59 1051.88 1055.23 1055.76 1073.07  
1076.84 1082.86 1092.84 1118.05 1151.00 1160.40  
1163.75 1176.74 1187.16 1196.61 1197.56 1197.99  
1198.98 1200.17 1209.94 1214.14 1216.83 1222.74  
1246.93 1264.30 1267.30 1272.13 1277.41 1281.99  
1285.91 1303.07 1307.65 1326.14 1331.53 1332.21  
1340.11 1362.29 1368.01 1372.51 1392.09 1392.85  
1411.80 1414.21 1420.79 1424.74 1434.69 1451.23  
1456.94 1474.17 1480.87 1487.29 1491.14 1492.26  
1496.44 1500.22 1501.63 1502.06 1507.27 1509.19  
1512.31 1518.42 1520.57 1524.30 1525.89 1531.13  
1537.85 1540.90 1556.07 1570.35 1608.72 1623.87  
1632.19 1639.61 1655.74 2065.10 2088.42 3023.06  
3045.03 3047.75 3050.98 3052.37 3055.16 3068.57  
3070.87 3081.91 3113.85 3116.27 3120.08 3122.24  
3124.36 3127.41 3134.34 3137.10 3139.44 3145.64  
3148.14 3150.14 3155.99 3159.21 3168.19 3175.46  
3178.06 3182.95 3184.64 3189.17 3191.02 3193.68  
3200.71 3201.47 3207.77 3209.73 3211.88 3226.19

4-TS

-200.09 19.96 26.30 27.36 34.73 38.12

42.54 47.53 49.20 50.73 56.10 65.16  
72.42 77.45 92.49 95.92 103.59 107.95  
108.99 121.60 128.70 129.67 133.17 141.49  
144.03 156.23 168.33 171.65 176.75 183.23  
185.50 193.43 195.33 207.23 220.49 232.78  
233.55 243.47 250.90 254.92 262.43 274.65  
291.18 298.64 306.24 317.43 328.52 331.32  
336.81 347.20 356.11 369.88 376.89 384.49  
390.01 405.73 418.89 423.46 432.52 446.78  
450.43 463.58 482.44 505.47 519.75 524.67  
527.09 551.59 574.52 578.06 583.34 587.31  
598.61 630.57 649.04 669.48 672.77 685.04  
686.00 704.60 709.40 710.93 715.12 727.66  
743.94 749.66 771.09 774.24 792.30 806.98  
849.83 852.17 853.60 856.26 868.78 873.61  
877.47 884.33 893.78 915.53 929.81 932.07  
933.44 943.25 943.36 949.61 959.99 964.66  
972.29 977.99 982.66 987.27 987.93 989.64  
1001.52 1010.14 1015.31 1016.21 1021.18 1030.02  
1037.53 1049.88 1053.10 1055.56 1061.43 1065.57  
1071.97 1082.99 1089.75 1119.60 1152.11 1158.90  
1167.86 1174.61 1187.47 1193.84 1196.42 1197.12  
1198.90 1200.31 1208.79 1218.14 1218.89 1219.57  
1246.59 1262.70 1264.60 1275.03 1277.07 1279.63  
1282.07 1304.00 1308.49 1327.52 1331.43 1337.18  
1345.31 1358.34 1369.45 1370.01 1389.81 1391.14  
1411.73 1413.82 1417.09 1424.48 1434.38 1448.40  
1462.72 1472.29 1477.09 1484.65 1487.19 1491.69  
1494.00 1496.40 1500.00 1501.39 1507.45 1509.57  
1518.06 1518.47 1521.71 1523.89 1526.60 1537.46  
1540.21 1541.31 1559.76 1591.00 1608.42 1622.60  
1633.83 1645.36 1655.61 2086.34 2209.27 3029.77  
3045.26 3047.82 3051.02 3055.00 3056.25 3067.82  
3069.08 3080.58 3106.58 3113.75 3115.79 3119.85  
3121.96 3128.08 3134.92 3135.26 3136.28 3143.32  
3146.49 3148.12 3149.72 3165.58 3169.65 3173.29  
3179.63 3179.77 3181.46 3187.99 3189.42 3190.87  
3198.79 3201.75 3206.52 3210.92 3212.59 3221.92

<sup>3</sup>4-TS

-368.08 23.95 33.72 34.77 36.36 39.93  
42.57 55.31 59.82 63.85 76.57 83.84  
105.80 112.14 117.45 127.22 134.27 146.23  
152.48 168.88 176.62 177.92 198.58 211.66  
218.12 226.60 240.12 255.09 264.39 266.88  
274.82 280.73 283.78 294.25 303.97 309.45  
313.47 324.34 331.14 339.17 348.60 354.61  
365.81 376.42 381.20 387.74 393.58 406.46  
417.75 426.09 437.53 441.88 456.69 462.54  
485.42 510.21 518.81 534.55 538.54 556.94  
581.53 581.90 585.04 619.39 629.07 648.89  
665.91 674.91 681.24 686.70 705.71 720.97  
723.41 724.85 748.08 748.39 768.57 772.75  
783.71 793.01 853.57 854.55 863.86 868.33  
871.28 873.54 921.64 936.84 940.54 943.09  
947.89 950.88 957.39 976.27 977.18 979.53  
986.50 989.71 999.63 1007.22 1011.50 1015.42  
1022.02 1029.91 1042.97 1054.02 1060.86 1070.90

1075.84 1084.56 1114.20 1126.49 1146.45 1155.63  
1159.68 1184.54 1193.26 1195.64 1197.27 1198.51  
1209.56 1211.81 1235.29 1240.37 1257.32 1265.13  
1275.53 1280.72 1294.83 1299.54 1327.34 1338.12  
1348.00 1357.16 1366.33 1373.57 1411.77 1416.20  
1424.92 1436.13 1453.73 1468.39 1473.51 1482.04  
1484.26 1486.30 1490.30 1495.54 1499.09 1503.88  
1508.03 1515.76 1520.40 1521.22 1524.08 1528.04  
1544.67 1575.29 1611.84 1621.04 1621.49 1631.64  
1653.49 1669.01 2079.05 2095.53 3048.14 3050.45  
3054.38 3061.59 3071.03 3114.60 3118.61 3127.12  
3129.63 3137.04 3143.30 3148.77 3149.98 3170.75  
3175.85 3181.40 3184.00 3185.26 3185.71 3190.87  
3191.71 3195.20 3196.36 3204.06 3208.71 3209.68  
3213.58 3213.69 3216.21

<sup>1</sup>4-TS

-209.33 25.63 31.31 39.86 49.20 58.84  
61.44 66.56 74.57 84.85 89.93 95.95  
111.31 113.83 126.73 128.09 143.87 158.24  
173.90 179.16 182.95 185.38 191.08 203.65  
229.74 244.73 251.94 257.28 262.05 281.56  
288.46 298.61 304.17 309.73 328.22 346.50  
347.92 356.34 362.61 369.38 373.33 383.14  
399.67 404.94 415.83 419.69 423.41 440.82  
450.47 463.35 476.46 496.84 509.60 519.45  
524.53 533.62 540.31 553.84 560.96 568.78  
574.07 582.77 589.42 606.94 630.23 651.95  
666.24 675.93 686.87 697.47 710.02 717.10  
737.99 744.44 754.35 769.86 778.02 778.99  
845.93 847.58 852.75 867.42 867.67 874.75  
879.77 916.94 921.53 938.67 942.71 946.58  
956.40 964.51 966.26 974.55 975.79 981.31  
987.71 989.20 995.77 999.97 1010.99 1018.26  
1022.14 1028.25 1036.98 1053.40 1057.71 1063.22  
1079.19 1083.86 1111.15 1131.40 1156.36 1160.92  
1188.35 1190.07 1194.08 1199.10 1201.37 1202.78  
1212.49 1222.52 1239.78 1264.30 1269.35 1276.16  
1289.97 1293.81 1299.82 1314.20 1341.15 1349.09  
1352.91 1363.86 1404.17 1413.81 1418.53 1419.18  
1426.59 1439.03 1470.83 1471.91 1475.40 1483.81  
1486.95 1490.12 1495.40 1499.51 1500.20 1505.01  
1511.71 1513.49 1519.43 1522.50 1525.37 1541.53  
1545.47 1572.72 1614.52 1619.67 1635.56 1638.59  
1641.24 1654.30 1916.97 2005.96 3052.75 3058.22  
3061.44 3065.55 3068.80 3119.21 3122.81 3129.48  
3132.59 3136.62 3151.40 3156.45 3162.86 3164.55  
3170.32 3171.93 3175.06 3180.02 3183.26 3187.50  
3189.07 3190.35 3195.03 3200.09 3200.60 3205.01  
3210.62 3212.25 3213.41

4

11.15 21.70 23.62 25.73 30.24 41.43  
43.98 46.95 50.81 62.26 67.49 74.08  
86.87 96.64 102.14 106.58 121.64 130.24  
139.97 145.83 150.68 156.15 159.75 167.89  
181.99 189.70 192.90 200.20 206.05 213.46

229.80 257.14 262.65 281.89 285.78 318.21  
326.94 357.49 380.16 396.74 414.31 424.26  
448.23 463.11 475.01 475.61 527.52 557.02  
567.23 569.49 576.47 584.13 602.52 634.65  
648.45 675.51 686.86 687.49 702.74 710.17  
713.68 741.24 743.66 764.04 774.51 780.77  
808.54 848.92 849.62 854.32 866.05 869.50  
886.06 892.44 916.48 926.27 930.36 938.17  
939.54 951.92 963.77 971.21 982.11 986.47  
993.79 999.12 1012.98 1017.49 1040.97 1046.95  
1053.46 1059.99 1065.32 1066.56 1078.04 1116.80  
1147.49 1158.82 1171.20 1191.25 1192.62 1193.73  
1201.00 1205.76 1214.20 1216.87 1231.15 1263.83  
1268.97 1277.24 1279.05 1294.51 1322.00 1328.75  
1340.87 1341.78 1354.20 1357.25 1369.79 1384.11  
1390.31 1412.98 1448.39 1466.23 1468.45 1485.72  
1488.96 1494.61 1496.41 1499.02 1510.89 1527.74  
1531.36 1538.37 1541.96 1558.58 1603.00 1623.86  
1625.12 1625.67 1651.01 2200.33 2312.02 3035.41  
3058.98 3064.71 3065.89 3066.03 3107.48 3110.00  
3121.51 3130.09 3141.62 3164.45 3165.76 3167.90  
3176.07 3176.85 3178.34 3183.50 3185.79 3186.17  
3193.81 3196.82 3198.31 3205.56 3207.06 3213.28

34

11.63 12.08 23.62 30.43 34.44 39.32  
43.80 51.56 58.24 68.26 73.32 81.75  
90.75 94.52 101.39 104.36 119.35 123.52  
141.92 151.77 153.81 163.92 166.81 180.97  
184.37 189.06 199.68 204.12 215.21 220.67  
247.05 270.48 271.59 312.27 318.25 329.80  
347.22 373.75 389.53 394.81 407.20 435.64  
451.07 467.85 471.35 477.05 531.33 559.68  
564.81 571.92 580.45 585.73 610.51 637.21  
651.97 678.37 688.95 698.92 699.83 715.09  
718.82 738.99 746.15 764.11 777.07 779.93  
795.31 851.70 853.71 860.91 864.67 866.81  
883.23 899.68 922.15 925.67 933.36 934.80  
937.85 944.69 961.26 971.90 980.89 986.30  
987.43 996.20 1012.94 1016.41 1041.87 1050.61  
1051.87 1062.64 1064.21 1075.43 1078.84 1116.73  
1148.63 1158.17 1171.19 1189.25 1193.27 1194.41  
1198.59 1201.26 1204.19 1213.19 1229.48 1263.33  
1270.84 1274.05 1280.31 1294.14 1328.63 1331.95  
1339.37 1345.30 1351.33 1358.65 1365.55 1382.58  
1386.07 1407.95 1450.73 1468.27 1471.78 1485.38  
1486.17 1495.60 1496.54 1500.38 1509.78 1530.98  
1531.39 1543.21 1545.94 1560.53 1602.49 1615.75  
1623.82 1628.70 1655.44 2170.50 2332.82 3058.21  
3059.56 3064.42 3067.95 3073.25 3117.68 3122.54  
3131.61 3134.59 3137.64 3166.18 3169.49 3176.04  
3179.14 3181.29 3186.62 3186.79 3187.22 3191.14  
3198.51 3199.99 3207.44 3208.78 3214.76 3255.47

14

19.77 29.81 30.76 34.54 41.10 47.23  
62.51 66.47 70.10 79.47 90.91 100.02

104.25 111.06 114.75 121.76 138.24 156.74  
164.25 173.24 182.62 199.14 205.83 222.90  
237.11 252.05 256.60 270.63 277.16 286.16  
324.93 329.19 338.04 373.90 392.19 406.27  
410.31 417.73 435.04 467.89 477.81 482.87  
496.77 507.32 537.99 541.57 551.75 569.12  
577.62 585.25 587.04 605.85 610.23 635.08  
657.75 676.53 690.93 701.52 722.72 738.07  
743.96 750.10 765.14 771.79 774.12 790.71  
848.79 860.89 864.74 872.35 878.04 890.86  
919.45 921.69 922.79 933.45 941.11 944.27  
960.04 973.19 975.78 981.12 982.17 983.74  
987.45 993.24 1010.17 1013.27 1052.40 1054.07  
1060.57 1063.65 1083.10 1087.70 1091.98 1115.43  
1148.77 1159.19 1175.33 1190.46 1195.07 1199.04  
1199.79 1202.48 1204.90 1214.45 1236.42 1258.67  
1259.95 1269.61 1283.22 1295.05 1326.13 1335.19  
1336.85 1350.21 1351.08 1356.56 1366.60 1380.20  
1408.04 1419.14 1466.58 1470.76 1472.30 1482.97  
1484.59 1484.86 1500.01 1510.45 1511.27 1532.07  
1536.50 1547.47 1572.38 1595.92 1614.98 1625.12  
1631.39 1641.73 1652.54 2008.47 2312.22 3041.47  
3054.05 3056.42 3061.11 3066.41 3102.01 3115.88  
3122.16 3123.30 3131.81 3168.61 3169.89 3172.12  
3174.98 3179.44 3186.38 3187.91 3193.80 3197.06  
3197.92 3203.31 3205.81 3209.95 3213.67 3220.92

4-TSa

-221.21 14.17 18.39 26.79 31.64 35.36  
38.65 42.95 46.47 49.13 53.21 61.69  
68.29 70.20 76.15 80.55 88.34 91.77  
93.05 96.91 101.82 104.49 108.07 111.05  
118.20 126.27 129.08 133.84 138.30 141.25  
143.99 148.20 150.19 165.78 174.88 180.28  
187.32 188.60 197.76 204.34 219.66 223.91  
236.88 239.30 248.60 257.49 261.28 273.53  
278.28 281.32 288.74 294.40 303.54 308.25  
318.55 322.87 335.44 345.28 367.33 373.31  
376.66 382.05 387.39 405.22 419.93 421.14  
434.60 445.01 448.60 463.08 484.88 506.86  
520.28 525.92 535.58 557.51 575.78 578.74  
584.90 584.98 589.14 612.41 626.68 641.03  
673.00 674.03 684.21 693.28 695.89 700.65  
708.35 713.10 721.34 729.66 741.40 747.21  
765.20 771.02 785.05 792.16 851.66 854.16  
856.09 856.84 863.11 866.33 866.87 875.85  
883.57 885.16 896.24 896.31 899.61 924.39  
925.92 930.94 933.46 934.70 943.41 944.85  
945.68 947.79 964.44 968.28 969.68 972.49  
978.87 984.53 988.57 990.81 991.65 1006.23  
1009.74 1015.91 1021.42 1030.61 1042.30 1047.84  
1048.40 1051.95 1053.50 1069.75 1070.86 1072.55  
1076.13 1085.28 1092.40 1118.42 1149.65 1154.31  
1166.39 1175.74 1177.28 1187.66 1189.60 1195.38  
1197.01 1197.36 1198.01 1200.81 1201.89 1203.20  
1209.38 1219.09 1221.21 1246.07 1260.94 1264.20  
1266.01 1267.70 1270.77 1271.61 1275.31 1284.92  
1302.36 1304.65 1324.40 1327.85 1328.97 1335.45

1340.90 1358.15 1359.19 1361.44 1369.47 1379.82  
1381.48 1384.14 1407.33 1409.49 1411.73 1414.07  
1424.45 1434.38 1447.12 1469.07 1473.25 1475.62  
1486.34 1487.42 1490.72 1492.87 1498.65 1500.76  
1502.31 1505.61 1511.41 1512.50 1513.73 1518.03  
1519.93 1521.06 1523.69 1525.05 1525.53 1530.85  
1540.52 1542.30 1549.54 1563.74 1584.42 1604.46  
1617.91 1635.03 1644.64 1655.85 2087.16 2193.64  
3019.47 3044.69 3046.93 3049.59 3050.33 3051.66  
3052.57 3054.09 3059.76 3065.05 3065.83 3066.03  
3081.78 3081.85 3106.39 3110.46 3113.03 3115.01  
3120.50 3120.69 3123.32 3127.88 3135.65 3136.75  
3138.39 3144.40 3147.57 3147.64 3151.68 3152.44  
3154.73 3158.26 3169.62 3176.94 3178.42 3183.55  
3189.53 3191.43 3199.10 3200.18 3201.84 3202.71  
3208.24 3217.49 3222.86

4-TSb

-369.02 21.87 25.00 26.75 31.02 35.81  
41.40 44.37 47.28 53.39 60.04 66.20  
71.53 75.41 78.56 93.47 96.89 111.71  
115.35 120.61 124.47 133.78 137.62 146.21  
152.64 159.08 173.70 179.97 187.71 189.98  
203.95 210.18 215.66 218.00 223.79 236.68  
247.64 253.06 264.03 270.99 274.64 279.90  
283.03 296.98 305.76 314.94 321.87 331.16  
341.71 344.72 368.14 368.91 386.83 395.17  
397.03 411.91 413.83 425.32 429.10 438.53  
452.57 467.49 497.06 500.95 519.44 525.15  
549.09 559.35 565.66 581.03 585.22 587.95  
592.15 630.93 634.13 673.38 676.24 694.78  
696.84 703.18 704.81 708.56 731.50 733.63  
744.21 756.71 765.43 777.21 794.48 804.98  
841.83 853.88 861.39 863.39 866.11 868.12  
873.16 883.40 884.01 887.70 924.90 930.00  
933.65 936.70 939.86 946.18 946.90 948.46  
966.79 968.90 972.55 973.90 978.37 980.94  
981.80 982.54 1005.28 1009.32 1017.45 1023.72  
1032.17 1048.70 1051.41 1054.96 1055.70 1060.09  
1077.18 1087.08 1106.90 1117.98 1143.87 1152.80  
1156.91 1170.67 1186.89 1187.95 1189.88 1194.66  
1196.88 1198.44 1201.22 1212.35 1212.60 1221.37  
1243.26 1251.16 1260.12 1261.91 1266.67 1272.97  
1285.15 1291.81 1296.34 1314.46 1328.03 1334.06  
1336.81 1356.42 1358.01 1366.70 1366.80 1381.13  
1407.21 1411.93 1415.80 1425.21 1435.93 1446.93  
1469.54 1478.60 1482.82 1485.03 1487.95 1492.40  
1495.52 1496.99 1500.33 1501.22 1504.69 1507.13  
1510.70 1517.36 1521.38 1522.29 1524.81 1530.87  
1541.99 1546.02 1567.28 1593.91 1605.24 1625.11  
1633.85 1642.05 1656.78 2033.96 2221.85 3044.32  
3049.51 3051.73 3054.94 3056.16 3059.19 3060.27  
3064.57 3075.30 3079.80 3119.51 3120.11 3122.37  
3128.96 3129.56 3131.10 3131.45 3142.15 3146.13  
3147.16 3148.39 3150.75 3152.07 3158.15 3162.42  
3172.18 3177.93 3179.87 3189.11 3189.41 3195.72  
3198.73 3199.56 3207.26 3208.36 3211.96 3225.32

5-TS

-116.34 20.60 24.33 29.43 37.52 39.84  
47.30 51.68 55.09 64.85 71.07 74.20  
78.25 83.96 91.17 94.88 96.52 106.64  
113.69 119.47 125.40 132.33 146.20 148.46  
154.14 159.62 165.02 168.78 174.45 187.45  
190.05 196.03 210.70 223.71 240.12 242.49  
255.27 263.81 265.79 276.26 296.10 302.36  
306.66 311.28 313.60 317.94 322.80 329.17  
334.48 338.34 358.41 364.81 374.73 382.95  
394.66 407.78 420.52 421.91 442.32 456.20  
466.81 475.42 480.96 514.59 524.28 528.17  
530.08 551.59 571.07 574.17 586.74 591.39  
595.97 629.17 642.47 658.33 668.27 674.51  
685.03 686.19 705.37 708.01 714.57 741.93  
748.59 761.94 764.62 798.28 805.28 830.13  
832.08 841.22 848.64 854.09 866.62 870.15  
872.80 884.85 900.01 911.03 923.71 926.68  
939.04 939.54 942.21 943.03 948.23 970.33  
972.04 974.19 977.10 977.95 981.22 989.99  
990.84 999.92 1004.35 1013.16 1022.30 1032.28  
1032.61 1049.64 1051.54 1051.57 1063.76 1065.76  
1079.74 1105.18 1136.82 1151.88 1158.47 1167.94  
1169.86 1187.87 1190.75 1193.50 1196.54 1197.63  
1201.65 1206.81 1219.74 1221.83 1235.16 1245.15  
1262.48 1270.66 1275.42 1283.25 1284.31 1300.14  
1305.64 1324.61 1326.84 1326.91 1331.96 1345.63  
1351.60 1360.82 1362.56 1379.98 1387.92 1407.21  
1416.47 1416.62 1419.64 1429.19 1439.54 1448.86  
1471.35 1473.68 1485.63 1490.27 1492.37 1493.45  
1493.77 1495.81 1500.05 1501.86 1505.83 1507.80  
1516.08 1519.49 1522.47 1525.39 1530.23 1539.10  
1543.35 1544.91 1559.36 1605.39 1622.84 1634.15  
1636.44 1652.35 1711.37 2116.43 2913.59 3022.05  
3050.93 3053.26 3053.99 3057.09 3063.00 3066.44  
3070.96 3081.25 3104.35 3119.74 3123.23 3126.73  
3132.27 3133.76 3135.26 3140.99 3150.40 3151.99  
3155.08 3160.09 3162.24 3163.91 3165.82 3171.91  
3173.42 3173.70 3179.04 3182.99 3184.85 3185.92  
3192.11 3196.67 3199.63 3203.36 3206.01 3215.80

<sup>35</sup>TS

-263.58 27.20 35.48 37.83 47.89 49.62  
55.10 61.25 65.00 74.13 76.25 81.66  
89.00 92.90 97.85 108.32 111.20 118.46  
124.41 134.17 147.64 150.77 155.42 166.33  
181.22 185.20 190.82 198.55 207.80 228.27  
233.71 240.51 241.74 264.67 265.33 271.55  
275.04 280.70 287.87 298.71 304.41 310.17  
319.84 333.49 335.00 339.96 352.33 356.18  
375.84 380.85 393.69 400.69 401.58 416.02  
424.12 427.05 443.73 455.95 464.73 472.03  
476.70 514.16 520.21 525.24 531.53 533.85  
545.16 552.87 575.14 582.03 586.63 592.27  
606.55 628.13 648.13 669.18 674.77 677.11  
691.17 709.08 710.45 716.79 741.89 748.67  
761.64 762.15 770.56 784.37 804.44 844.61



852.29 855.21 856.87 867.41 869.62 872.64  
878.95 886.97 918.82 926.01 928.76 934.08  
935.88 940.36 942.79 947.47 973.04 973.27  
974.80 982.66 984.74 986.23 986.91 989.81  
991.06 1011.48 1014.35 1016.28 1021.10 1032.52  
1038.42 1050.78 1054.50 1063.69 1070.81 1075.33  
1077.62 1106.93 1120.55 1133.60 1153.63 1159.40  
1177.27 1190.24 1191.12 1191.66 1197.04 1197.55  
1198.46 1202.28 1206.11 1213.70 1228.55 1245.97  
1258.97 1268.91 1275.60 1277.71 1283.02 1291.69  
1304.52 1306.95 1328.17 1330.75 1331.33 1348.60  
1351.59 1359.28 1365.48 1382.19 1384.35 1413.94  
1415.27 1417.19 1426.34 1427.86 1437.00 1451.61  
1475.95 1476.85 1485.89 1489.86 1492.49 1494.19  
1494.95 1497.31 1499.76 1501.61 1507.51 1510.52  
1519.37 1522.21 1522.82 1529.91 1530.61 1536.10  
1544.18 1547.37 1559.39 1604.94 1618.30 1625.46  
1635.63 1649.15 1671.27 2049.55 2958.46 3048.75  
3048.82 3050.73 3054.28 3058.54 3062.19 3067.75  
3076.62 3085.24 3112.92 3116.13 3120.20 3122.90  
3129.17 3129.54 3134.99 3136.29 3144.08 3148.85  
3149.29 3159.83 3167.30 3167.85 3170.50 3174.44  
3174.85 3175.75 3181.49 3185.33 3189.48 3194.18  
3195.88 3202.13 3202.95 3205.08 3208.55 3212.99

15-TS

-260.27 14.13 30.52 38.78 44.58 48.48  
55.88 57.76 66.18 72.84 77.26 83.99  
90.42 98.25 103.36 106.75 117.48 119.60  
126.64 133.61 142.25 152.11 155.54 162.49  
173.29 181.38 185.70 200.95 203.63 213.11  
225.13 242.92 247.86 259.96 262.31 272.41  
276.26 283.66 285.10 299.99 306.90 321.43  
326.82 333.62 334.99 345.93 362.50 368.64  
373.77 383.90 396.97 403.09 405.68 420.97  
427.78 429.17 449.05 465.39 472.66 478.68  
491.13 510.36 517.45 521.56 534.43 541.44  
564.23 568.66 573.47 583.38 587.96 589.89  
607.21 628.45 648.87 652.89 671.34 673.44  
687.77 711.67 713.36 728.09 748.71 753.35  
754.26 760.30 768.50 796.25 815.95 817.57  
847.85 851.25 862.41 869.68 872.80 876.06  
877.38 892.68 916.71 923.52 926.03 935.04  
940.54 944.35 945.29 948.85 968.43 969.76  
975.94 979.31 981.01 982.24 983.00 990.71  
992.20 994.36 1009.99 1012.73 1022.41 1031.51  
1045.26 1049.96 1055.37 1058.33 1071.70 1078.12  
1085.25 1105.54 1137.20 1153.06 1157.03 1164.01  
1175.83 1183.98 1188.89 1193.01 1193.44 1194.08  
1196.53 1208.41 1209.32 1214.33 1216.89 1241.37  
1253.13 1270.03 1274.84 1279.06 1281.32 1296.76  
1301.26 1312.53 1320.97 1325.46 1327.76 1345.04  
1355.31 1355.99 1360.49 1362.69 1379.37 1412.51  
1414.64 1418.63 1421.31 1427.39 1438.57 1449.54  
1468.28 1474.62 1478.04 1484.56 1487.51 1492.31  
1494.50 1496.70 1498.42 1502.80 1508.14 1509.27  
1514.74 1519.17 1521.54 1522.16 1528.13 1530.83  
1543.76 1545.31 1582.99 1616.60 1623.06 1632.66

1636.91 1650.52 1723.73 2009.44 2857.44 3050.17  
3051.04 3053.54 3055.93 3056.17 3060.02 3063.29  
3081.20 3081.51 3113.37 3120.30 3122.50 3128.38  
3130.86 3131.70 3132.19 3134.60 3137.27 3150.83  
3151.61 3160.18 3164.63 3168.79 3172.20 3175.14  
3178.75 3181.96 3183.70 3184.06 3190.94 3196.18  
3197.83 3204.99 3207.68 3208.76 3214.22 3216.33

5

15.61 19.50 22.99 25.74 28.50 31.59  
39.24 43.10 45.31 50.26 54.04 64.26  
67.92 76.55 82.60 87.30 93.59 103.31  
106.88 115.78 121.74 130.02 134.54 142.37  
144.41 151.20 154.21 162.22 170.90 173.98  
179.45 186.00 193.36 197.02 218.65 225.94  
231.47 239.22 242.91 252.40 262.17 268.02  
291.24 301.05 307.14 312.10 321.69 325.97  
332.02 334.68 345.75 359.76 373.30 382.09  
389.98 413.75 422.27 428.36 441.70 458.17  
470.00 478.96 484.17 516.46 525.89 529.23  
536.12 550.27 572.95 584.53 593.52 595.79  
606.57 627.24 642.56 669.03 677.26 679.03  
684.57 692.31 703.80 708.67 714.87 742.09  
746.25 761.35 764.78 800.20 821.60 824.12  
828.88 834.55 848.84 854.35 869.70 869.90  
871.05 882.27 904.99 909.48 920.13 925.22  
940.00 941.50 943.82 945.53 951.12 970.28  
971.68 975.31 977.64 982.11 982.60 984.43  
989.45 1002.34 1004.42 1007.04 1023.65 1032.13  
1033.18 1046.81 1048.93 1054.47 1065.17 1065.49  
1082.50 1103.52 1140.33 1151.90 1158.24 1167.55  
1172.90 1186.24 1192.40 1194.49 1194.89 1199.70  
1204.47 1206.32 1219.57 1239.16 1245.37 1251.29  
1257.74 1275.54 1276.31 1285.63 1292.25 1302.70  
1308.60 1326.40 1327.70 1330.31 1345.43 1345.78  
1356.17 1363.37 1371.30 1378.24 1391.77 1413.24  
1417.13 1419.10 1421.94 1432.36 1442.61 1448.08  
1466.40 1474.00 1484.90 1485.22 1492.29 1493.03  
1494.07 1494.94 1498.24 1501.80 1505.05 1508.95  
1513.68 1517.63 1521.00 1525.71 1528.56 1537.83  
1540.94 1544.94 1559.13 1602.86 1621.58 1635.02  
1636.76 1652.87 1709.97 2200.92 2886.16 3020.20  
3049.99 3052.69 3056.06 3059.02 3065.70 3067.21  
3069.08 3081.22 3099.79 3121.46 3124.33 3127.30  
3133.51 3135.34 3136.11 3142.68 3144.72 3148.48  
3151.85 3159.60 3159.68 3164.40 3167.60 3169.62  
3172.57 3174.76 3178.55 3179.09 3179.83 3187.38  
3190.10 3194.94 3196.84 3202.88 3206.37 3223.25

35

26.61 31.38 36.86 39.95 46.32 49.06  
52.93 59.91 62.37 63.75 70.87 75.47  
76.96 81.06 93.32 98.92 104.86 112.43  
115.93 122.97 132.68 144.55 151.84 158.76  
165.91 172.46 174.45 187.29 187.46 198.75  
225.40 233.70 237.20 246.59 253.68 261.70  
268.34 276.80 286.68 298.60 306.81 313.91  
329.87 330.97 332.66 339.22 340.93 349.43  
363.58 373.30 379.93 382.95 394.31 417.46  
420.30 429.75 432.83 447.48 462.11 469.18  
472.06 484.30 518.98 526.20 528.83 533.32  
553.54 560.42 579.46 584.10 590.21 598.74  
606.79 629.67 644.24 672.99 677.72 688.53  
691.52 704.22 710.65 712.10 720.88 746.09  
747.90 767.21 768.92 799.61 821.84 829.61

838.42 843.35 850.75 860.08 865.87 872.03  
 873.69 883.49 898.40 914.07 920.18 925.11  
 939.37 941.91 946.65 948.01 950.84 971.82  
 972.24 974.20 975.21 978.29 978.32 982.96  
 984.10 995.09 999.73 1013.52 1023.73 1033.55  
 1038.96 1051.30 1052.52 1052.93 1063.05 1070.23  
 1085.45 1108.31 1141.91 1153.16 1159.03 1164.04  
 1173.23 1191.71 1193.14 1195.16 1199.99 1200.39  
 1202.23 1204.26 1233.04 1235.54 1244.76 1250.59  
 1258.38 1276.09 1277.30 1279.83 1288.89 1301.88  
 1307.81 1324.46 1325.04 1329.58 1341.32 1346.46  
 1354.78 1363.25 1368.32 1377.95 1387.85 1402.46  
 1408.39 1418.42 1421.55 1431.38 1441.78 1451.67  
 1470.37 1472.26 1484.52 1487.80 1490.89 1492.25  
 1492.69 1495.37 1497.18 1499.80 1500.98 1508.15  
 1511.36 1517.48 1521.07 1523.51 1523.80 1532.82  
 1537.34 1541.31 1569.11 1606.12 1622.07 1630.37  
 1636.74 1650.41 1689.76 2055.05 2977.05 3026.82  
 3051.80 3055.43 3056.02 3057.98 3067.33 3068.03  
 3068.64 3075.70 3115.31 3121.34 3126.59 3132.75  
 3132.82 3135.47 3137.01 3145.45 3150.94 3155.55  
 3160.56 3161.21 3164.42 3166.09 3166.56 3169.07  
 3171.48 3176.96 3177.75 3182.15 3182.43 3188.74  
 3195.58 3196.69 3202.68 3206.41 3206.86 3221.80

15

27.26 28.13 35.81 39.72 45.32 53.22  
 56.32 61.27 62.47 70.55 79.60 81.46  
 83.68 87.46 101.58 103.10 113.10 118.92  
 129.33 134.10 141.96 149.24 166.00 173.24  
 175.88 182.61 192.05 195.31 215.80 225.15  
 234.53 236.21 254.19 259.78 262.38 268.98  
 270.53 281.05 289.97 304.45 305.91 311.88  
 323.51 333.32 341.41 347.06 353.27 363.13  
 371.92 382.99 390.48 392.88 412.70 420.48  
 422.26 433.07 452.22 470.64 475.11 486.70  
 495.65 510.12 518.64 527.25 532.54 545.04  
 565.57 576.22 583.09 585.78 592.00 605.35  
 608.70 627.26 651.05 676.89 678.51 680.72  
 687.48 697.85 712.65 715.73 730.76 748.19  
 758.98 767.18 772.07 819.80 823.58 826.60  
 829.21 836.09 847.69 867.10 869.77 873.36  
 881.25 888.90 911.51 919.87 920.32 926.10  
 940.74 941.75 951.33 952.28 954.82 973.11  
 973.54 975.91 979.66 981.66 982.83 983.95  
 984.34 986.69 998.62 1007.58 1023.42 1034.02  
 1047.65 1050.42 1054.63 1062.10 1078.57 1082.01  
 1083.11 1105.27 1141.86 1155.61 1160.83 1163.03  
 1173.22 1189.44 1189.79 1195.52 1196.97 1199.94  
 1202.09 1203.62 1223.28 1232.47 1245.33 1250.44  
 1256.72 1259.61 1277.23 1284.00 1288.66 1294.78  
 1309.47 1320.22 1325.80 1329.19 1345.38 1346.81  
 1353.86 1359.47 1362.52 1371.90 1377.32 1406.61  
 1410.36 1418.79 1421.80 1432.14 1442.17 1450.76  
 1469.50 1470.28 1478.61 1483.01 1484.90 1486.17  
 1489.14 1492.62 1494.89 1498.73 1500.87 1510.49  
 1514.90 1517.73 1520.53 1520.95 1523.87 1531.03  
 1538.85 1540.83 1596.98 1621.60 1626.79 1631.75  
 1637.14 1652.24 1697.50 1991.11 2897.86 3009.11  
 3044.43 3051.98 3055.05 3058.78 3063.80 3065.61  
 3068.71 3075.67 3122.33 3126.09 3128.22 3132.81  
 3134.05 3135.98 3136.98 3144.04 3145.11 3148.76  
 3158.13 3158.69 3162.04 3167.07 3169.35 3171.25  
 3171.47 3177.95 3181.35 3183.41 3186.10 3192.43  
 3194.89 3198.45 3199.20 3209.15 3211.79 3223.92

6-TS

=====

-205.01 12.23 22.30 27.63 30.08 38.72  
 39.29 42.07 45.93 48.26 55.39 57.74  
 63.64 70.11 71.79 74.50 82.29 83.20  
 91.44 99.01 105.99 108.60 113.24 122.24  
 125.26 127.63 131.25 136.35 140.70 155.39  
 160.12 162.37 168.59 169.32 179.06 186.06  
 198.73 201.82 205.93 218.35 224.61 228.65  
 231.07 237.65 242.90 244.11 249.32 253.64  
 266.01 270.96 284.49 287.77 299.39 301.23  
 303.56 310.51 324.24 326.80 330.31 336.45  
 338.94 340.27 347.49 362.14 367.77 373.15  
 377.52 387.43 392.83 404.63 410.66 417.43  
 420.10 425.95 441.75 451.46 464.89 478.40  
 489.50 498.69 519.22 522.23 524.96 525.64  
 551.94 556.49 577.90 581.64 585.37 586.21  
 604.11 609.14 628.52 641.53 648.17 655.46  
 669.20 674.38 681.53 682.05 683.32 706.48  
 709.81 711.92 717.96 732.27 741.85 747.88  
 766.05 771.61 784.83 815.13 850.03 852.14  
 853.11 857.57 860.48 863.49 869.31 875.18  
 877.52 879.00 882.49 891.08 913.69 925.85  
 929.06 931.17 936.18 937.47 937.82 941.89  
 943.13 948.81 959.37 971.60 974.59 977.62  
 978.18 979.04 979.45 979.98 985.38 992.68  
 998.90 1001.30 1014.75 1018.71 1022.83 1028.82  
 1036.72 1040.68 1048.02 1050.66 1054.36 1058.20  
 1069.22 1071.41 1082.99 1097.75 1114.86 1129.60  
 1143.50 1153.90 1160.40 1175.62 1184.88 1186.98  
 1191.59 1191.99 1192.94 1196.31 1196.51 1200.81  
 1210.83 1212.45 1216.65 1220.37 1222.94 1249.14  
 1250.38 1263.55 1270.21 1273.80 1274.90 1278.06  
 1278.87 1288.63 1302.39 1305.49 1306.72 1311.28  
 1329.85 1330.35 1334.72 1337.79 1346.74 1357.50  
 1366.74 1370.13 1390.94 1411.08 1412.29 1413.00  
 1414.63 1416.00 1419.30 1423.33 1429.01 1429.46  
 1433.42 1439.12 1446.86 1465.48 1471.60 1475.40  
 1486.07 1487.04 1491.69 1491.83 1492.81 1495.86  
 1496.63 1499.41 1499.69 1501.50 1504.09 1506.96  
 1510.04 1514.35 1517.11 1518.28 1519.37 1519.68  
 1522.34 1522.82 1527.91 1538.44 1539.34 1540.79  
 1546.65 1548.80 1561.49 1604.97 1626.21 1633.23  
 1639.43 1657.78 1911.81 2169.77 3018.52 3042.76  
 3046.06 3046.12 3047.86 3051.15 3051.89 3052.82  
 3055.02 3057.49 3065.00 3075.07 3080.67 3090.65  
 3098.61 3109.31 3115.01 3117.36 3117.51 3118.56  
 3124.03 3126.30 3126.50 3129.44 3130.35 3134.67  
 3135.45 3139.02 3142.95 3143.60 3145.66 3147.14  
 3150.91 3153.88 3159.99 3162.50 3164.51 3166.14  
 3169.52 3169.75 3171.52 3172.09 3179.74 3185.22  
 3189.39 3191.78 3199.29 3205.42 3209.94 3220.19

6-TS'

=====

-565.40 15.20 19.86 26.74 37.00 41.20  
 41.56 46.48 54.05 58.36 61.71 65.85  
 68.96 73.40 80.95 88.86 101.37 104.34  
 115.41 117.63 124.72 130.97 140.65 144.20  
 144.51 155.01 160.82 179.32 184.02 191.38  
 199.28 205.56 214.37 219.07 230.09 230.38  
 235.87 239.60 248.28 255.26 257.58 261.18  
 263.95 280.49 298.34 300.84 303.19 305.39  
 317.67 323.26 329.67 330.85 339.60 340.97  
 343.20 348.50 374.97 377.86 379.76 382.59  
 395.84 399.00 406.60 419.94 423.08 438.06  
 452.08 466.17 478.24 483.28 495.34 501.10  
 507.41 520.89 524.31 529.05 555.16 557.78  
 568.62 578.02 585.57 591.69 599.96 618.35

629.76 656.15 661.42 675.10 677.98 678.28  
679.76 687.99 696.31 705.14 712.25 734.87  
739.28 741.30 762.77 773.27 776.01 822.91  
834.11 843.30 854.36 860.41 862.31 868.86  
871.88 874.49 878.18 890.09 923.99 926.04  
937.28 942.26 947.39 947.73 949.33 954.36  
954.52 966.35 973.06 974.82 977.33 979.72  
985.23 994.06 996.72 1000.81 1001.13 1017.13  
1021.41 1023.72 1032.69 1035.69 1047.21 1048.00  
1061.46 1066.36 1084.82 1088.66 1117.64 1139.20  
1140.56 1148.78 1160.10 1185.00 1187.19 1188.50  
1190.28 1191.33 1192.03 1194.23 1195.00 1206.52  
1223.13 1225.64 1231.05 1248.33 1248.63 1255.13  
1266.83 1269.59 1281.02 1284.59 1292.83 1302.59  
1309.33 1309.90 1327.85 1336.54 1348.04 1360.70  
1367.04 1381.63 1413.99 1414.53 1416.56 1416.64  
1427.09 1428.22 1437.03 1437.89 1448.27 1457.04  
1466.84 1474.23 1479.27 1486.59 1487.86 1490.82  
1493.29 1494.01 1496.08 1498.02 1498.89 1500.83  
1502.37 1504.46 1510.63 1517.50 1517.72 1518.06  
1519.66 1521.60 1524.78 1526.02 1529.98 1539.58  
1542.27 1595.15 1600.91 1617.27 1626.97 1640.17  
1645.18 1761.90 2214.60 3048.69 3050.34 3051.42  
3051.46 3053.94 3054.78 3058.19 3059.22 3062.18  
3067.70 3115.96 3121.49 3121.76 3122.28 3126.77  
3127.44 3127.71 3131.48 3131.70 3134.08 3140.20  
3143.77 3144.86 3149.29 3151.29 3158.59 3159.14  
3159.32 3166.31 3168.14 3174.53 3175.43 3177.55  
3179.39 3184.37 3189.03 3195.42 3198.49 3200.37  
3205.92 3211.56 3222.29

6-TS"

-388.12 20.42 21.35 28.02 30.85 40.52  
42.35 51.36 54.38 61.40 65.87 68.41  
75.07 77.37 82.94 88.84 93.03 94.59  
102.20 116.59 119.45 128.80 137.49 140.02  
149.31 159.71 170.32 173.44 175.81 184.38  
212.02 218.54 230.35 237.94 240.78 245.16  
252.26 254.14 257.21 266.03 267.04 275.75  
292.51 298.66 302.01 306.63 312.95 318.33  
326.31 329.34 331.20 336.46 338.00 340.20  
349.80 358.66 371.41 376.65 382.67 385.24  
393.86 394.87 416.22 417.46 422.01 438.31  
451.32 458.63 463.06 474.58 489.23 493.40  
515.23 521.64 522.73 528.86 552.00 561.41  
573.17 577.21 583.37 587.03 602.98 624.20  
633.07 649.55 672.34 674.06 677.84 681.42  
685.18 702.50 709.98 710.24 719.13 730.07  
749.47 751.06 758.38 772.58 777.38 812.32  
849.28 854.35 861.66 863.06 864.42 865.14  
872.01 876.81 883.10 923.84 925.30 938.68  
942.39 943.23 946.13 946.96 950.12 952.09  
963.42 973.85 975.51 977.40 979.19 980.20  
984.06 986.11 998.24 999.85 1003.86 1016.13  
1019.53 1026.11 1027.76 1038.08 1045.15 1057.74  
1059.32 1074.69 1077.65 1116.56 1129.02 1146.73  
1150.15 1158.10 1163.31 1185.68 1186.60 1187.45  
1190.71 1193.72 1196.20 1196.52 1205.72 1217.33  
1219.99 1225.98 1244.49 1248.94 1258.81 1264.68  
1273.04 1281.68 1293.58 1294.56 1295.39 1305.64  
1317.22 1318.80 1335.37 1337.36 1353.43 1363.05  
1365.37 1402.82 1412.85 1415.39 1418.18 1420.85  
1426.61 1429.22 1438.13 1440.21 1449.85 1453.02  
1457.87 1467.69 1474.57 1485.06 1485.65 1488.57  
1491.88 1493.81 1494.49 1496.68 1497.89 1500.02  
1501.56 1501.71 1502.05 1518.66 1518.76 1519.85  
1520.59 1521.06 1524.46 1529.69 1537.79 1542.12

1542.16 1570.60 1602.48 1624.94 1629.88 1632.77  
1660.01 1705.68 2083.84 3047.91 3050.50 3052.89  
3053.30 3054.62 3057.61 3059.97 3061.91 3069.11  
3086.08 3112.96 3120.58 3121.06 3121.87 3125.56  
3129.75 3131.33 3133.07 3140.09 3140.36 3144.81  
3146.13 3149.47 3153.22 3154.22 3154.45 3157.83  
3165.45 3167.62 3174.52 3175.94 3176.37 3178.21  
3184.14 3188.47 3189.25 3194.70 3197.91 3203.58  
3206.97 3208.61 3209.72

6

17.57 22.99 27.50 31.88 35.55 36.97  
46.47 53.79 55.25 56.55 65.05 67.22  
74.91 77.25 80.14 89.90 98.90 104.48  
107.40 115.75 117.17 125.72 133.93 135.82  
150.14 156.43 157.61 172.46 180.17 190.54  
195.23 199.95 203.96 223.69 228.30 240.17  
252.91 259.26 274.53 278.67 286.09 299.58  
301.78 317.36 323.13 329.74 333.29 340.08  
341.31 354.52 358.21 374.40 377.72 385.77  
398.01 419.67 423.51 433.72 456.67 467.44  
485.61 489.34 501.64 522.14 529.55 558.20  
564.43 567.60 583.02 586.06 586.75 596.59  
630.69 652.18 654.04 678.31 679.39 685.53  
689.95 694.78 714.13 716.77 733.59 738.22  
748.19 768.00 771.08 778.70 828.12 830.50  
845.03 859.90 860.94 867.57 869.64 878.18  
884.31 890.59 892.39 918.48 921.76 923.10  
931.49 937.02 941.01 947.47 954.95 966.06  
972.71 979.22 979.93 983.63 993.41 997.08  
1000.41 1005.77 1006.85 1021.58 1023.58 1035.42  
1045.63 1046.01 1061.61 1064.76 1066.71 1081.37  
1089.94 1116.14 1139.79 1152.78 1160.98 1173.19  
1186.00 1189.03 1190.64 1195.02 1196.09 1196.22  
1197.55 1200.19 1205.16 1226.10 1250.30 1254.35  
1266.11 1267.99 1269.34 1287.98 1288.31 1295.74  
1303.37 1311.29 1327.93 1331.65 1346.61 1350.52  
1360.09 1366.86 1375.68 1382.45 1409.22 1412.30  
1416.14 1427.83 1437.55 1446.20 1458.20 1468.15  
1470.28 1479.55 1486.03 1489.96 1491.15 1493.64  
1499.12 1499.51 1500.53 1502.26 1509.90 1513.93  
1514.34 1518.12 1522.18 1523.29 1533.89 1539.18  
1543.22 1544.87 1589.91 1595.28 1607.12 1624.39  
1626.65 1639.63 1659.52 2001.97 3043.88 3047.49  
3050.19 3051.90 3056.77 3059.15 3062.13 3065.99  
3066.57 3069.38 3109.40 3119.18 3120.73 3121.68  
3121.90 3124.40 3126.16 3128.04 3131.77 3135.71  
3138.40 3144.60 3150.82 3163.71 3164.72 3172.35  
3172.55 3174.26 3177.68 3178.82 3179.28 3191.42  
3197.45 3198.35 3202.07 3205.43 3213.64 3230.80

36

16.04 20.87 25.85 30.43 34.03 39.21  
42.01 48.92 55.05 60.67 61.86 64.46  
75.22 79.71 86.99 88.66 92.70 98.34  
106.72 113.82 120.53 126.59 128.92 132.72  
145.60 150.73 161.78 163.67 173.71 181.58  
191.59 197.25 209.33 216.06 229.65 242.43  
243.24 254.99 271.01 272.93 284.15 300.86  
302.33 303.64 315.07 317.09 331.58 336.30  
351.52 354.18 365.51 373.38 392.09 396.75  
404.51 415.50 431.81 435.05 447.97 462.68  
475.59 484.96 491.06 521.43 531.39 558.96  
562.53 568.80 579.21 582.83 583.62 606.26  
632.61 649.99 650.79 672.06 674.99 683.25  
688.53 700.39 712.53 717.83 720.12 736.80

743.82 764.20 771.80 801.42 839.02 851.63  
853.07 854.71 858.80 863.39 866.95 867.81  
882.32 889.68 914.21 923.13 925.13 932.76  
934.84 936.60 939.76 944.94 949.49 961.06  
970.31 976.56 981.87 983.06 992.71 995.62  
996.63 1003.94 1012.83 1018.70 1026.90 1035.74  
1041.66 1048.00 1059.39 1063.72 1064.71 1067.57  
1079.54 1125.23 1148.59 1149.55 1158.15 1171.87  
1178.53 1189.09 1192.51 1193.45 1195.56 1200.50  
1202.16 1203.96 1217.80 1231.64 1241.87 1265.86  
1273.55 1276.41 1277.33 1278.40 1291.82 1295.82  
1329.17 1331.52 1335.60 1348.02 1354.25 1357.64  
1359.49 1370.30 1379.38 1385.21 1389.89 1413.10  
1417.14 1421.76 1432.52 1443.28 1449.56 1467.71  
1471.09 1474.86 1478.73 1483.37 1493.78 1495.74  
1497.31 1499.10 1499.24 1501.13 1509.32 1516.39  
1517.23 1521.97 1523.06 1530.22 1540.12 1541.56  
1542.32 1549.97 1557.13 1608.65 1620.00 1624.48  
1635.06 1656.36 1739.27 2189.60 3028.50 3047.04  
3054.93 3055.56 3055.81 3063.41 3065.39 3073.02  
3073.74 3097.69 3116.76 3120.81 3122.36 3122.70  
3125.83 3130.81 3132.51 3134.96 3135.03 3135.29  
3143.94 3164.80 3168.09 3172.60 3174.32 3175.26  
3179.36 3179.93 3183.91 3183.95 3185.58 3190.41  
3191.67 3195.62 3199.54 3205.69 3207.36 3238.91

16

20.11 34.74 39.29 43.45 47.01 54.80  
56.95 62.95 65.45 70.25 74.40 85.28  
88.65 92.67 97.05 98.86 109.83 115.21  
122.27 127.31 138.86 146.92 153.16 155.08  
167.49 175.48 180.09 198.42 205.68 214.05  
215.10 235.39 243.96 248.62 270.11 274.47  
281.17 294.62 301.31 309.28 312.78 317.67  
326.97 331.22 337.51 355.22 362.26 379.64  
384.21 407.27 410.83 413.41 423.84 433.87  
444.05 468.28 475.14 478.13 493.54 504.30  
514.29 518.71 541.02 553.25 565.46 568.58  
575.86 584.69 587.02 595.20 603.61 615.57  
631.48 640.11 654.77 664.46 672.99 694.38  
706.53 710.87 723.72 736.89 738.76 743.96  
765.54 768.24 774.51 840.34 847.30 850.20  
858.43 862.24 867.62 873.90 875.37 887.38  
907.09 917.09 922.96 924.81 926.44 936.06  
937.43 945.53 947.07 949.78 958.09 971.10  
976.01 981.07 983.90 985.84 987.09 991.03  
991.69 1000.06 1009.90 1015.69 1026.58 1035.20  
1047.74 1057.10 1063.97 1066.70 1082.69 1086.07  
1088.76 1117.90 1147.96 1152.42 1161.19 1167.66  
1180.63 1189.74 1191.03 1196.95 1197.30 1199.07  
1201.53 1217.59 1226.65 1239.78 1241.61 1253.16  
1257.23 1274.48 1275.92 1281.24 1289.49 1293.61  
1326.03 1326.87 1340.74 1348.66 1349.47 1354.47  
1355.75 1368.34 1379.71 1385.25 1407.35 1415.28  
1421.28 1421.68 1432.35 1443.57 1458.04 1466.05  
1469.22 1480.26 1483.85 1487.83 1489.01 1491.87  
1496.05 1498.54 1499.01 1504.11 1512.48 1513.68  
1518.75 1519.12 1525.47 1535.33 1537.39 1545.63  
1548.05 1562.74 1597.97 1615.06 1630.71 1631.46  
1640.42 1655.86 1677.67 1982.75 3044.76 3052.18  
3053.33 3054.32 3060.12 3061.39 3063.73 3068.02  
3069.66 3105.50 3117.08 3119.89 3120.44 3123.37  
3127.51 3130.80 3133.43 3136.10 3145.20 3155.29  
3159.63 3170.13 3172.41 3172.86 3175.00 3175.30  
3180.43 3181.67 3183.12 3187.24 3192.35 3193.56  
3196.81 3197.54 3202.71 3206.01 3209.75 3213.77

7-TS

-97.30 14.83 25.91 27.92 35.31 36.56  
38.63 44.19 51.76 54.80 58.59 63.43  
71.74 74.06 80.10 82.58 85.00 88.43  
93.60 98.88 100.70 105.46 109.37 111.74  
114.12 122.03 123.02 128.34 132.58 142.77  
149.17 157.88 165.89 171.63 179.11 184.24  
195.76 200.53 212.24 229.04 232.61 241.68  
245.97 250.17 257.99 274.14 275.99 281.94  
283.39 289.57 306.27 308.21 311.90 313.59  
318.12 326.64 327.28 332.29 333.89 337.80  
342.59 345.39 353.93 362.77 365.33 378.58  
382.02 387.48 392.67 395.54 410.57 427.89  
429.16 441.23 446.86 465.57 468.03 482.12  
491.36 502.46 514.48 516.50 520.91 523.60  
542.75 551.68 564.39 579.24 582.31 587.16  
590.19 594.91 595.93 633.44 645.59 647.81  
667.55 673.92 678.46 680.92 689.19 712.79  
714.36 715.42 732.05 744.31 745.44 751.66  
762.26 794.00 812.51 818.12 834.63 842.92  
851.55 856.70 858.63 870.21 871.64 873.15  
874.38 882.59 896.78 912.64 914.65 925.67  
927.45 934.90 939.03 939.90 941.14 942.73  
944.67 944.76 969.93 974.06 975.18 975.48  
978.59 980.00 981.76 983.42 989.86 998.84  
1012.90 1015.18 1021.84 1025.71 1030.55 1033.94  
1039.70 1040.74 1050.69 1054.19 1059.50 1063.41  
1069.66 1084.03 1101.48 1124.29 1141.21 1143.14  
1153.31 1159.38 1163.40 1164.50 1187.61 1188.25  
1189.63 1191.06 1193.37 1201.67 1203.01 1207.17  
1211.71 1214.09 1218.01 1233.21 1235.66 1247.94  
1261.76 1266.62 1268.38 1271.44 1275.30 1276.14  
1283.11 1291.71 1298.91 1299.34 1303.60 1325.13  
1326.99 1329.21 1343.65 1350.13 1351.71 1354.81  
1366.13 1379.94 1383.77 1401.85 1410.31 1412.39  
1415.24 1415.79 1420.50 1422.01 1425.63 1430.04  
1435.35 1441.58 1447.73 1471.67 1473.59 1484.60  
1486.19 1487.07 1490.74 1492.21 1493.56 1494.10  
1497.71 1498.40 1499.64 1500.11 1502.44 1503.84  
1507.93 1511.18 1518.87 1520.34 1522.19 1522.99  
1523.40 1525.59 1528.25 1539.37 1540.76 1541.58  
1543.33 1547.77 1563.33 1606.42 1625.21 1639.87  
1640.80 1661.37 2046.41 2939.13 3003.46 3030.13  
3040.88 3045.29 3048.14 3049.13 3052.08 3052.39  
3053.14 3056.04 3056.40 3061.45 3069.24 3075.60  
3099.01 3113.40 3115.11 3116.33 3119.25 3121.21  
3124.91 3125.56 3127.93 3129.25 3130.80 3134.33  
3142.20 3146.38 3147.84 3151.76 3153.08 3154.51  
3163.40 3166.20 3166.34 3166.69 3168.08 3174.97  
3178.66 3179.22 3179.78 3180.88 3187.36 3192.43  
3193.24 3194.50 3201.14 3207.60 3207.99 3220.45

7

15.13 22.14 27.54 34.01 35.05 35.67  
40.38 44.83 48.07 55.08 56.11 61.40  
64.58 68.98 71.43 73.15 77.18 81.85  
84.85 87.41 95.33 97.60 101.86 106.85  
114.23 117.99 121.82 126.24 127.58 135.88  
145.08 151.96 157.96 165.10 169.52 181.44  
193.47 200.95 210.18 213.40 216.91 230.56  
236.77 237.88 248.50 255.05 258.86 262.95  
268.18 277.52 293.02 298.94 300.13 308.87  
311.15 315.89 320.01 322.74 328.05 331.31  
333.53 334.73 341.26 358.98 368.77 372.46  
376.33 388.39 392.50 397.39 418.52 420.00  
424.05 433.11 443.68 465.78 471.95 473.21

479.18 492.74 517.67 520.44 525.03 527.75  
544.77 549.76 574.21 582.45 585.44 596.66  
597.39 598.80 609.47 627.64 647.55 670.22  
673.52 676.21 679.64 685.86 690.34 696.32  
708.88 710.29 711.21 740.49 741.46 748.28  
762.87 795.19 800.23 814.95 825.12 833.51  
849.75 853.35 853.68 864.30 867.21 869.19  
875.69 881.44 906.77 908.79 915.32 921.45  
925.05 939.08 939.73 940.48 942.48 944.39  
946.05 951.09 968.92 969.29 974.94 975.83  
976.50 978.74 980.26 981.66 984.06 991.74  
995.98 999.33 1023.45 1024.18 1032.86 1033.86  
1039.97 1041.78 1048.20 1049.00 1052.79 1065.46  
1071.35 1083.63 1109.60 1136.19 1141.54 1142.21  
1151.91 1159.99 1164.10 1171.71 1186.11 1191.13  
1191.79 1192.53 1194.84 1202.34 1203.97 1207.08  
1210.13 1215.48 1241.16 1243.04 1249.97 1251.66  
1256.37 1267.23 1273.61 1277.38 1277.96 1278.66  
1289.10 1297.27 1302.18 1304.05 1306.25 1326.08  
1327.94 1332.56 1339.66 1346.69 1351.22 1363.72  
1375.25 1382.03 1384.35 1407.78 1411.77 1413.90  
1415.41 1418.66 1422.60 1425.31 1431.60 1435.12  
1442.46 1447.98 1471.47 1474.10 1475.27 1484.86  
1486.42 1490.17 1490.63 1492.27 1492.66 1494.74  
1495.61 1498.60 1500.39 1500.69 1502.91 1505.13  
1508.73 1510.15 1516.48 1518.32 1520.27 1520.78  
1521.44 1523.66 1528.19 1533.58 1540.28 1540.57  
1541.95 1549.63 1561.37 1599.60 1624.29 1634.41  
1640.25 1659.43 2134.59 2966.00 2994.17 3009.55  
3043.82 3046.31 3046.70 3048.58 3051.21 3053.69  
3056.04 3057.76 3063.30 3067.79 3069.05 3083.42  
3114.02 3117.17 3121.30 3122.84 3122.86 3123.74  
3127.33 3127.79 3128.53 3131.22 3134.66 3138.93  
3139.75 3144.91 3147.13 3147.28 3149.13 3149.23  
3150.93 3154.41 3157.65 3157.82 3163.96 3170.42  
3170.64 3171.98 3176.13 3178.49 3183.03 3185.26  
3194.53 3198.47 3206.62 3224.10 3235.80 3238.81

---

---

37

-36.46 3.70 14.10 25.00 30.45 37.99  
40.10 44.06 44.73 51.14 54.99 56.27  
62.29 66.67 69.76 71.92 77.12 80.69  
83.25 88.24 92.57 96.70 102.78 105.95  
112.37 115.01 117.91 124.45 125.37 135.28  
136.71 148.30 152.53 159.33 167.40 174.05  
183.67 191.87 210.58 217.55 225.22 227.91  
235.45 235.82 238.67 251.44 257.46 269.32  
276.95 280.83 295.35 298.70 300.14 307.16  
314.76 315.68 321.61 322.82 330.97 332.87  
336.04 342.80 346.73 362.05 372.88 375.87  
377.95 392.49 393.79 398.96 418.76 420.95  
429.27 431.86 448.28 464.61 471.08 473.76  
482.01 492.73 518.35 520.75 526.19 529.93  
543.85 553.46 578.72 582.65 587.03 594.86  
597.38 608.44 612.12 627.90 650.37 668.05  
673.34 679.48 683.79 687.26 689.71 695.49  
709.35 713.78 715.07 739.16 744.01 747.91  
764.21 791.63 795.35 813.25 824.38 834.05  
850.86 853.02 855.85 863.78 868.82 870.56  
876.83 882.89 907.07 908.39 920.81 922.68  
924.80 936.18 938.49 939.91 943.05 945.58  
946.21 950.21 967.44 969.17 975.43 976.03  
976.98 978.79 979.79 982.01 984.84 990.73  
995.84 998.82 1023.55 1023.79 1032.28 1032.85  
1039.53 1047.91 1048.27 1051.78 1055.40 1068.06  
1073.69 1083.89 1105.92 1132.11 1139.04 1143.14  
1154.12 1161.51 1163.65 1171.41 1189.58 1190.71

1191.54 1193.28 1195.03 1203.05 1204.37 1206.02  
1209.49 1215.65 1239.04 1242.03 1250.63 1252.14  
1255.63 1266.40 1268.21 1273.06 1278.32 1279.78  
1285.99 1299.07 1301.54 1303.61 1306.48 1325.81  
1330.42 1331.34 1342.70 1345.42 1348.34 1363.47  
1374.80 1382.20 1385.05 1404.79 1408.63 1411.54  
1414.70 1418.68 1422.80 1425.29 1431.64 1434.85  
1442.59 1451.99 1455.42 1475.30 1476.33 1484.51  
1486.82 1489.69 1491.06 1491.88 1493.25 1494.82  
1495.67 1498.50 1499.66 1500.85 1500.99 1507.78  
1508.95 1510.61 1516.55 1519.16 1520.26 1520.64  
1521.62 1523.85 1526.45 1533.69 1539.53 1540.77  
1541.21 1550.15 1566.63 1606.45 1624.06 1635.47  
1640.33 1659.60 2188.42 2961.18 2996.68 3008.18  
3042.97 3045.15 3045.84 3047.93 3051.21 3052.96  
3056.22 3058.05 3067.83 3067.94 3068.83 3085.87  
3112.48 3121.68 3121.80 3123.41 3123.52 3127.20  
3127.51 3128.71 3130.93 3134.84 3134.99 3143.49  
3144.94 3146.23 3147.08 3150.42 3150.75 3151.65  
3154.53 3155.23 3156.37 3162.70 3163.67 3169.10  
3173.30 3178.52 3178.81 3181.18 3182.21 3184.47  
3193.89 3198.61 3205.48 3229.05 3235.82 3251.46

---

---

17

28.72 31.44 33.31 38.94 40.42 43.41  
51.75 55.05 57.71 61.72 66.80 71.11  
77.70 83.07 87.23 94.34 95.98 102.06  
104.45 107.07 113.51 117.14 122.24 129.84  
131.64 145.61 153.96 156.51 165.94 171.08  
177.82 182.76 193.37 204.20 208.53 224.04  
226.13 232.66 239.92 244.04 251.20 251.71  
261.36 278.35 281.40 284.62 293.21 299.77  
301.93 307.92 313.84 318.85 321.27 324.97  
330.93 333.17 339.03 340.41 349.14 362.46  
366.81 373.60 383.09 385.50 399.12 404.97  
415.57 422.19 424.74 431.24 434.90 452.34  
476.46 478.72 481.63 489.50 495.64 519.00  
520.61 522.91 526.11 541.05 548.82 562.38  
578.37 582.67 588.05 592.58 598.07 605.97  
616.71 617.86 622.68 636.16 658.16 665.76  
671.74 679.74 680.09 691.66 695.41 710.94  
714.32 718.16 735.59 744.79 750.87 768.84  
778.24 817.59 821.63 831.41 841.15 847.89  
853.23 869.29 872.02 872.35 877.97 883.08  
890.46 912.95 915.61 925.91 926.86 928.61  
934.19 938.41 938.76 942.26 946.89 949.04  
957.77 964.01 971.59 976.70 978.23 982.28  
985.90 987.00 987.90 991.72 994.71 995.55  
1005.00 1017.83 1020.20 1027.98 1031.21 1033.13  
1043.90 1047.70 1056.11 1064.08 1069.38 1086.56  
1087.24 1093.69 1101.63 1128.49 1131.38 1149.27  
1161.56 1168.05 1168.30 1172.13 1187.58 1189.60  
1194.40 1196.52 1198.75 1201.38 1204.02 1205.85  
1211.97 1214.82 1228.69 1237.01 1248.77 1253.50  
1255.99 1261.49 1263.74 1266.65 1275.19 1279.87  
1295.37 1296.45 1298.15 1301.18 1312.28 1323.64  
1327.01 1343.47 1347.17 1360.54 1362.56 1363.80  
1381.42 1382.99 1395.33 1406.92 1408.61 1410.95  
1417.55 1423.01 1423.04 1431.92 1432.12 1443.88  
1450.14 1468.50 1477.90 1478.68 1480.54 1483.53  
1486.28 1487.40 1491.42 1492.23 1494.56 1496.70  
1497.25 1497.81 1500.92 1501.15 1510.21 1512.95  
1516.86 1517.27 1518.12 1521.70 1522.02 1523.16  
1523.44 1525.77 1531.85 1536.79 1540.49 1543.97  
1545.51 1591.29 1620.33 1624.46 1637.17 1642.88  
1650.52 1658.03 1958.95 2915.99 2990.55 3041.03  
3043.96 3046.07 3051.03 3051.28 3052.51 3055.19

3058.30 3064.32 3068.08 3072.77 3077.93 3095.06  
 3109.14 3111.62 3113.29 3118.39 3119.71 3121.41  
 3122.75 3126.31 3126.73 3131.30 3131.73 3133.41  
 3134.95 3138.56 3145.46 3148.59 3150.58 3152.42  
 3155.20 3158.67 3166.62 3170.76 3174.25 3176.07  
 3177.04 3184.66 3185.92 3186.15 3192.89 3198.07  
 3201.73 3205.04 3209.87 3237.99 3245.43 3251.17

8

20.07 22.29 26.80 30.12 33.36 36.12  
 41.43 46.01 48.48 52.12 56.78 59.31  
 64.73 68.88 72.06 75.62 81.57 82.85  
 85.97 92.57 99.37 101.69 108.07 110.66  
 114.70 123.19 129.30 133.92 136.46 144.36  
 149.84 157.26 166.48 169.36 179.16 186.51  
 195.16 200.49 204.26 207.31 210.34 236.85  
 238.06 240.39 256.90 260.61 262.93 276.64  
 289.12 292.45 300.12 303.53 305.41 310.21  
 314.68 319.02 326.74 329.95 331.97 335.70  
 339.68 348.54 358.63 362.41 366.31 380.63  
 388.94 390.85 397.58 413.69 422.38 424.16  
 431.65 448.05 452.25 464.63 469.54 477.77  
 482.22 494.25 511.58 520.71 523.74 526.08  
 556.27 574.46 579.07 583.79 586.13 587.34  
 606.13 613.26 630.68 646.63 652.91 658.48  
 669.77 673.27 677.59 680.38 686.33 711.81  
 713.00 714.35 722.34 743.50 748.68 751.48  
 764.46 809.43 818.21 841.10 844.19 847.84  
 857.60 858.78 864.61 869.34 870.10 871.63  
 881.55 891.17 892.15 915.56 919.44 930.41  
 934.52 940.81 943.19 943.96 944.84 946.43  
 949.13 950.86 967.49 972.75 973.43 977.07  
 979.34 979.64 984.14 985.46 991.14 1000.17  
 1009.54 1011.31 1025.20 1027.44 1033.33 1035.68  
 1040.81 1046.16 1057.47 1057.77 1063.03 1067.75  
 1081.13 1081.66 1103.55 1129.31 1151.26 1152.29  
 1158.06 1159.46 1168.14 1178.99 1188.06 1189.01  
 1191.41 1194.08 1194.35 1196.71 1196.91 1206.35  
 1216.35 1221.78 1227.90 1238.57 1246.19 1258.94  
 1267.71 1273.56 1274.37 1274.75 1276.03 1281.23  
 1289.38 1295.72 1301.45 1325.78 1327.04 1327.20  
 1342.45 1350.64 1353.10 1359.82 1374.48 1375.96  
 1385.74 1402.36 1407.38 1414.46 1415.51 1416.67  
 1420.48 1420.62 1428.71 1430.02 1430.75 1439.46  
 1441.14 1442.29 1446.14 1467.32 1467.89 1482.77  
 1484.03 1487.31 1493.52 1493.85 1494.65 1495.81  
 1497.76 1498.51 1499.28 1501.32 1502.19 1503.22  
 1506.97 1512.31 1519.78 1520.49 1521.36 1522.90  
 1523.07 1524.07 1533.26 1543.62 1543.94 1545.22  
 1545.78 1550.03 1561.20 1606.62 1625.56 1629.51  
 1642.55 1665.29 2168.82 3009.39 3048.22 3049.46  
 3052.79 3052.80 3053.30 3056.14 3059.42 3060.18  
 3064.93 3068.75 3071.48 3087.76 3106.31 3111.37  
 3115.89 3117.74 3120.80 3121.61 3124.98 3127.19  
 3128.18 3130.63 3132.92 3134.62 3135.79 3137.68  
 3138.74 3146.70 3147.54 3149.51 3156.77 3160.37  
 3162.14 3166.46 3167.50 3169.40 3171.73 3175.32  
 3175.35 3178.05 3181.15 3181.20 3183.08 3185.53  
 3186.76 3191.81 3199.76 3201.24 3206.51 3207.57

38

14.12 22.27 25.62 28.24 32.08 37.90  
 39.28 42.16 44.21 49.50 58.57 60.78  
 65.20 66.09 71.52 77.28 84.25 88.40  
 92.84 99.49 109.36 114.37 115.73 120.42

126.31 128.34 132.36 135.92 153.73 158.62  
 166.21 167.77 171.36 178.58 190.92 192.81  
 199.91 204.88 209.74 213.80 230.98 237.39  
 239.56 251.90 254.16 257.58 277.57 281.40  
 289.69 300.96 301.82 303.96 312.37 316.27  
 321.35 326.13 327.76 331.46 335.66 337.93  
 347.43 354.33 354.84 366.75 377.38 385.10  
 389.13 392.80 400.97 408.19 418.04 424.75  
 444.17 447.08 458.25 460.99 465.31 476.29  
 481.05 493.37 511.74 524.02 525.21 528.37  
 559.22 572.22 584.59 584.80 586.00 587.66  
 617.04 618.78 631.25 653.05 656.39 664.32  
 671.96 675.42 685.84 687.71 688.52 712.02  
 716.87 719.97 723.83 742.44 747.50 750.90  
 762.75 806.12 814.94 840.64 851.92 853.51  
 857.01 861.32 866.48 869.72 870.92 871.21  
 883.57 890.26 893.66 919.61 922.73 935.62  
 936.63 939.44 940.09 941.96 942.19 947.91  
 949.10 952.93 966.10 973.33 977.48 978.23  
 980.27 983.88 985.08 987.03 992.86 1001.36  
 1010.60 1012.21 1024.07 1026.05 1034.77 1035.13  
 1046.54 1049.89 1054.74 1057.57 1069.13 1071.97  
 1080.43 1082.95 1115.29 1141.61 1150.60 1153.69  
 1156.79 1162.56 1169.40 1180.96 1190.78 1191.47  
 1193.09 1194.71 1195.43 1196.16 1197.65 1205.78  
 1212.38 1220.05 1223.76 1243.36 1247.71 1259.68  
 1271.20 1273.94 1274.47 1275.45 1277.40 1282.35  
 1293.02 1296.09 1301.39 1324.13 1330.31 1334.94  
 1347.56 1351.12 1355.09 1358.19 1364.33 1371.94  
 1388.12 1397.24 1399.82 1413.00 1415.88 1416.24  
 1419.12 1420.03 1428.70 1430.71 1438.78 1441.24  
 1444.01 1450.14 1458.59 1467.96 1472.28 1483.74  
 1485.01 1485.29 1493.55 1493.71 1494.61 1496.35  
 1497.55 1498.23 1501.51 1502.07 1504.67 1506.07  
 1507.69 1511.27 1520.36 1521.03 1521.37 1522.06  
 1522.52 1524.54 1531.07 1542.15 1542.74 1543.62  
 1546.79 1547.11 1566.35 1615.19 1625.46 1628.22  
 1642.19 1664.81 2157.46 3022.28 3047.86 3048.59  
 3050.89 3051.51 3053.63 3055.26 3057.95 3058.34  
 3063.04 3071.80 3075.44 3096.32 3100.00 3114.08  
 3117.93 3119.43 3120.19 3122.93 3127.96 3129.71  
 3131.09 3132.83 3134.67 3137.78 3141.11 3142.06  
 3146.90 3147.13 3147.65 3149.54 3151.34 3154.31  
 3156.98 3166.94 3167.30 3169.94 3172.64 3173.55  
 3173.58 3175.07 3183.52 3184.77 3186.79 3190.69  
 3194.23 3196.92 3198.68 3203.92 3206.23 3206.62

18

18.35 25.20 29.34 34.56 40.41 42.31  
 43.66 46.12 54.15 59.09 60.45 62.25  
 66.48 69.03 80.10 86.45 88.25 94.82  
 100.17 107.35 111.28 118.83 120.69 125.00  
 130.43 136.03 144.06 162.08 163.76 169.14  
 169.80 177.35 181.03 198.15 201.13 209.18  
 213.92 228.81 230.84 239.80 240.91 253.77  
 255.07 265.66 281.41 287.39 291.38 301.12  
 304.82 314.05 315.43 317.22 329.06 329.30  
 332.54 338.41 341.18 349.47 356.77 361.38

366.76 376.43 385.35 390.06 395.11 405.00  
410.37 419.89 426.83 439.45 444.41 459.39  
461.94 473.75 477.79 488.91 493.89 512.19  
520.70 523.10 525.77 538.08 545.43 557.10  
569.95 573.94 581.06 585.10 587.53 595.70  
604.53 620.20 631.46 655.52 657.63 662.83  
672.15 674.98 688.53 691.52 697.02 712.56  
719.23 723.24 738.11 745.07 751.32 765.60  
773.68 804.98 840.76 845.37 850.66 862.29  
863.93 867.91 870.07 872.52 876.01 892.25  
894.41 895.73 919.45 922.26 933.74 936.69  
941.43 941.52 941.81 947.74 947.93 951.10  
953.05 964.94 977.90 978.96 981.22 984.89  
987.77 988.79 992.66 993.93 996.01 1002.30  
1010.32 1013.69 1023.47 1026.04 1035.31 1035.75  
1054.86 1057.56 1063.25 1069.03 1070.69 1080.74  
1087.49 1091.55 1115.03 1143.15 1149.89 1154.38  
1155.30 1166.73 1166.97 1181.68 1189.77 1191.27  
1192.63 1195.04 1195.78 1198.92 1202.62 1205.70  
1219.26 1221.21 1223.46 1242.82 1248.28 1253.26  
1262.22 1273.08 1273.23 1276.62 1281.34 1285.28  
1292.75 1295.06 1301.38 1323.34 1328.08 1347.33  
1349.04 1350.04 1356.23 1365.04 1366.63 1371.64  
1380.77 1393.37 1409.09 1414.78 1415.66 1417.84  
1419.73 1427.45 1430.15 1431.56 1437.63 1440.97  
1442.23 1462.25 1463.88 1470.58 1477.47 1483.99  
1484.50 1484.69 1492.49 1493.12 1494.12 1494.87  
1497.09 1497.54 1498.31 1501.51 1502.05 1508.95  
1513.02 1517.30 1520.16 1520.30 1521.72 1522.26  
1522.75 1525.13 1532.30 1542.38 1543.34 1544.75  
1547.95 1566.63 1603.72 1614.08 1637.01 1641.48  
1642.90 1664.82 1977.10 3003.99 3048.24 3049.45  
3051.07 3052.08 3054.03 3056.49 3059.44 3060.76  
3062.86 3069.63 3080.83 3089.06 3103.92 3113.38  
3115.96 3118.94 3122.03 3122.43 3125.11 3128.45  
3129.52 3130.72 3131.59 3132.96 3136.95 3138.32  
3141.57 3147.22 3150.92 3151.04 3155.61 3156.34  
3162.51 3165.45 3170.96 3172.25 3175.53 3177.74  
3178.54 3182.47 3184.57 3190.06 3196.97 3197.32  
3199.53 3202.82 3204.65 3204.87 3209.18 3211.10

11

22.48 27.53 35.69 40.92 44.42 48.15  
61.99 67.27 80.45 90.71 96.66 106.62  
120.49 124.70 131.17 139.72 149.02 171.91  
193.13 202.92 219.30 237.87 251.28 261.17  
271.08 283.48 289.63 293.76 298.97 310.04  
317.41 321.94 328.28 332.06 340.76 367.85  
369.42 377.55 380.97 400.63 419.80 457.06  
459.08 464.73 480.44 515.92 525.08 532.74  
560.97 573.29 586.37 595.36 646.73 668.42  
671.03 695.59 709.12 731.82 744.70 745.51  
763.76 769.76 793.02 845.65 862.48 865.79  
874.81 887.69 915.72 921.33 939.68 941.77  
953.12 963.46 966.44 977.73 979.12 981.41  
988.95 998.45 1027.60 1035.47 1048.23 1052.44  
1061.47 1078.31 1080.83 1121.66 1151.87 1161.28  
1176.02 1189.74 1194.94 1197.38 1200.03 1206.99

1243.56 1255.81 1278.82 1285.16 1295.24 1307.84  
1328.94 1350.93 1355.57 1371.65 1402.42 1420.35  
1423.02 1433.19 1442.57 1459.36 1467.51 1468.72  
1483.95 1486.29 1493.19 1493.30 1494.82 1497.01  
1503.58 1516.60 1521.80 1525.37 1535.90 1543.15  
1592.81 1603.59 1631.37 1633.78 1996.91 2772.77  
3051.20 3056.59 3058.79 3062.58 3064.25 3091.67  
3124.19 3128.93 3130.65 3137.51 3143.49 3147.34  
3157.11 3159.44 3163.02 3173.63 3177.17 3181.22  
3182.87 3187.54 3197.33 3197.93 3205.80 3210.80

12

23.77 30.58 33.29 44.95 49.16 54.21  
58.78 67.90 89.26 102.00 115.22 119.07  
128.76 141.48 154.54 162.79 172.63 178.78  
193.75 206.97 214.43 233.78 246.10 251.18  
270.34 293.55 296.56 309.08 312.35 324.99  
332.79 333.02 340.31 352.80 359.19 367.43  
382.24 386.90 391.21 413.80 423.66 462.79  
465.14 480.60 492.35 521.10 529.60 555.70  
565.56 576.55 587.78 592.05 651.44 672.25  
675.20 696.65 703.89 714.44 735.20 747.80  
769.41 773.38 824.35 845.22 856.53 874.22  
879.84 912.23 918.87 934.98 939.89 944.12  
951.63 962.63 967.67 978.46 983.80 987.22  
995.13 1004.40 1008.00 1020.91 1030.67 1055.63  
1063.82 1079.75 1085.96 1090.50 1122.57 1155.17  
1162.89 1187.97 1190.85 1197.30 1202.10 1209.80  
1231.77 1251.64 1258.25 1264.71 1290.62 1298.93  
1305.27 1329.00 1351.71 1361.69 1412.54 1415.73  
1426.09 1430.16 1436.09 1465.23 1470.93 1473.87  
1485.32 1487.19 1491.79 1496.23 1498.78 1503.39  
1505.68 1516.68 1521.23 1525.06 1540.81 1560.85  
1607.58 1614.90 1636.61 1640.60 2002.99 2587.05  
3026.64 3046.79 3051.00 3053.90 3066.28 3097.86  
3102.64 3117.82 3119.72 3126.59 3133.39 3141.88  
3151.59 3153.44 3163.47 3177.77 3180.39 3180.77  
3187.52 3191.23 3200.07 3201.89 3209.76 3213.16

12-TS

-571.79 21.88 35.49 41.74 46.37 54.94  
64.71 75.10 80.04 108.46 121.14 130.40  
133.93 141.55 159.22 178.53 184.85 193.79  
202.30 211.18 226.68 240.24 245.86 258.16  
261.89 297.31 304.56 312.95 317.60 320.21  
334.15 338.92 349.40 368.38 372.52 376.89  
391.86 395.63 425.40 437.54 456.32 463.97  
480.15 494.32 507.33 522.94 527.86 555.67  
568.00 575.15 591.37 612.55 655.47 675.80  
677.11 687.66 702.71 711.36 736.73 741.49  
769.90 775.83 842.41 857.95 861.48 867.93  
878.99 890.39 920.17 937.33 943.79 947.63  
949.42 966.27 971.89 979.18 983.91 991.74  
1000.65 1006.63 1020.93 1034.06 1054.35 1059.04  
1070.47 1083.10 1090.78 1140.04 1149.89 1159.01  
1185.90 1190.65 1191.05 1194.52 1205.50 1221.88  
1234.07 1247.95 1254.82 1267.68 1281.45 1293.12

1308.50 1326.36 1335.14 1353.87 1383.58 1414.43  
1417.29 1427.08 1436.82 1447.21 1465.39 1467.75  
1487.27 1490.97 1494.08 1498.03 1498.68 1500.96  
1502.57 1514.55 1517.66 1519.45 1523.66 1539.29  
1600.62 1615.86 1641.56 1645.04 1745.30 2024.72  
3046.33 3050.97 3053.81 3057.46 3060.74 3066.67  
3112.90 3122.21 3126.83 3131.53 3142.97 3146.87  
3147.55 3153.26 3165.10 3170.92 3175.68 3179.84  
3180.81 3190.19 3193.32 3201.34 3207.70 3212.66

1417.89 1426.02 1437.41 1470.35 1481.05 1483.39  
1485.11 1489.03 1494.10 1496.17 1498.90 1501.52  
1509.19 1516.90 1519.41 1521.92 1523.14 1540.82  
1619.06 1625.77 1634.37 1648.34 2028.29 3039.46  
3043.17 3047.89 3056.56 3062.30 3063.72 3109.12  
3115.28 3117.72 3121.13 3127.16 3136.59 3152.23  
3155.16 3158.06 3161.58 3169.41 3180.57 3185.85  
3192.92 3195.84 3203.37 3209.65 3214.22 3224.51

=====  
13  
=====

18.55 34.17 38.90 46.71 48.05 51.29  
66.61 76.27 88.85 91.19 111.72 121.37  
127.82 136.18 143.83 162.32 170.42 185.07  
212.35 227.33 230.10 250.04 257.29 270.84  
289.59 298.05 302.47 310.90 318.93 324.72  
338.12 348.54 352.74 374.00 377.52 384.49  
391.38 402.17 427.36 431.34 446.82 455.99  
475.08 491.01 497.74 519.91 530.67 542.60  
565.62 583.61 594.94 611.21 638.77 679.66  
682.89 688.78 713.09 739.33 744.96 764.19  
772.68 812.69 826.12 830.99 857.87 875.34  
877.33 895.26 940.99 945.19 948.51 953.76  
970.17 980.06 981.87 982.91 988.11 996.20  
1000.41 1023.81 1036.20 1046.52 1050.62 1056.36  
1080.81 1089.60 1119.71 1146.54 1163.30 1175.69  
1190.95 1197.30 1203.81 1224.15 1224.91 1236.76  
1248.04 1277.12 1277.70 1301.79 1314.05 1316.65  
1326.48 1340.00 1352.73 1367.85 1381.86 1419.73  
1421.22 1431.05 1441.01 1469.22 1469.30 1484.20  
1487.29 1488.05 1494.63 1495.34 1501.02 1501.51  
1509.53 1518.64 1519.53 1522.09 1525.96 1541.99  
1597.33 1627.78 1634.29 1649.28 1997.53 2954.31  
3042.80 3055.83 3058.22 3061.57 3061.99 3066.14  
3129.12 3133.13 3137.86 3141.07 3141.70 3149.53  
3156.81 3157.50 3157.78 3169.80 3170.75 3177.39  
3184.46 3185.99 3193.90 3202.08 3204.91 3214.84

=====  
14  
=====

21.33 27.06 38.51 49.24 53.42 66.82  
84.04 90.22 97.33 120.54 130.08 138.48  
147.47 166.36 173.60 197.23 211.51 218.73  
227.95 238.90 243.90 250.40 259.13 274.62  
287.47 300.21 304.53 312.46 315.91 337.34  
339.51 369.23 372.59 375.41 388.72 406.07  
412.27 423.46 432.37 444.96 457.93 467.78  
476.64 486.71 521.39 531.97 541.21 571.11  
577.31 584.73 608.28 662.09 676.24 684.46  
697.98 714.03 733.56 742.51 743.85 763.85  
766.09 806.12 827.65 854.38 869.97 874.93  
879.44 890.02 915.39 938.25 941.82 947.39  
951.27 975.29 976.36 982.70 985.13 992.54  
994.65 1010.91 1020.37 1031.07 1042.51 1059.27  
1063.90 1088.63 1098.15 1129.60 1161.63 1166.03  
1188.27 1191.85 1194.69 1205.73 1210.48 1227.32  
1234.32 1243.37 1267.73 1275.54 1293.70 1296.88  
1318.44 1343.80 1356.28 1368.80 1396.70 1412.16



## VIII. References

- (1) S. Stoll and A. Schweiger. EasySpin, a Comprehensive Software Package for Spectral Simulation and Analysis in EPR. *J. Magn. Reson.* 2006, **178**, 42-55.
- (2) U. K. Das, S. L. Daifuku, T. E. Iannuzzi, S. I. Gorelsky, I. Korobkov, B. Gabidullin, M. L. Neidig and R. T. Baker. *Inorg. Chem.*, 2017, **56**, 13766-13776.
- (3) T. T. Ngyuen, J. H. Kim, S. Kim, C. Oh, M. Flores, T. L. Groy, M. H. Baik and R. J. Trovitch. *Chem. Commun.* 2020, **56**, 3959-3962.
- (4) R. K. Sahoo, M. Mahato, A. Jana and S. Nembenna. *J. Org. Chem.* 2020, **85**, 11200-11210.
- (5) APEX 2, Bruker AXS Inc., Madison, Wisconsin, USA, 2012
- (6) Sheldrick, G. M. SADABS, Program for empirical absorption correction of area detector data, University of Göttingen, Germany, 1996.
- (7) G. M. Sheldrick *Acta Cryst.* 2015, **C71**, 3-8.
- (8) P. G. Parr and W. Yang. *Density Functional Theory of Atoms and Molecules*, Oxford University Press: New York, 1989, pp 1-325.
- (9) A. D. Bochevarov, E. Harder, T. F. Hughes, J. R. Greenwood, D. A. Braden, D. M. Philipp, D. Rinaldo, M. D. *Int. J. Quantum Chem.* 2013, **113** (18), 2110-2142.
- (10) J. C. Slater. *The Self-Consistent Field for Molecules and Solids: Quantum Theory of Molecules and Solids*; McGraw-Hill Book Company, 1974.
- (11) S. H. Vosko, L. Wilk and M. Nusair. *Can. J. Phys.* 1980, **58**, 80-159.
- (12) A. D. Becke. *Phys. Rev. A Gen. Phys.* 1988, **38** (6), 3098-3100.
- (13) C. Lee, W. Yang, and R. G. Parr. *Phys. Rev. B Condens. Matter.* 1988, **37** (2), 785-789.
- (14) A. D. Becke. *J. Chem. Phys.* 1993, **98**, 5648-5652.
- (15) S. Grimme, J. Antony, S. Ehrlich and H. Krieg. *J. Chem. Phys.* 2010, **132** (15), 154104.
- (16) T. H. Dunning. *J. Chem. Phys.* 1989, **90** (2), 1007-1023.
- (17) B. Marten, K. Kim, C. Cortis, R. A. Friesner, R. B. Murphy, M. N. Ringnalda, D. Sitkoff and B. Honig. *J. Phys. Chem.* 1996, **100** (28), 11775-11788.
- (18) M. Friedrichs, R. Zhou, S. R. Edinger and R. A. Friesner. *J. Phys. Chem. B.* 1999, **103** (16), 3057-3061.
- (19) S. R. Edinger, C. Cortis, P. S. Shenkin, and R. A. Friesner. *J. Phys. Chem. B.* 1997, **101**, 1190-1197.
- (20) A. A. Rashin and B. Honig. *J. Phys. Chem.* 1985, **89** (26), 5588-5593. Edinger, S. R.; Cortis, C.; Shenkin, P. S.; Friesner, R. A. Solvation Free Energies of Peptides: Comparison of Approximate Continuum Solvation Models with Accurate Solution of the Poisson-Boltzmann Equation. *J. Phys. Chem. B.* **1997**, *101*, 1190-1197.
- (21) Rashin, A. A.; Honig, B. Reevaluation of the Born Model of Ion Hydration. *J. Phys. Chem.* **1985**, *89* (26), 5588-5593.
